# Supplementary material for: Asymmetric synthesis of dihydrocoumarins via the organocatalytic hetero-Diels–Alder reaction of ortho-quinone methides
Source: Royal Society of Chemistry journal article supplement (doi:10.1039/c7ob02325a), 2017-01-01
Supplement: c7ob02325a1.pdf [file c7ob02325a1.pdf]

# Supporting Information

Lili Zhang, Yang Liu, Kun Liu, Zhantao Liu, Ningning He, Wenjun Li\*

Department of Medicinal Chemistry, School of Pharmacy, Qingdao University,  
Qingdao, 266021, China.

|                                                        |    |
|--------------------------------------------------------|----|
| A: General Information and Starting Materials .....    | 1  |
| B: General Procedure for Cascade Reactions .....       | 2  |
| C: Characterization Data.....                          | 3  |
| D: De- <i>tert</i> -butylation reaction .....          | 12 |
| E: Mechanistic study.....                              | 15 |
| F: HPLC Analysis .....                                 | 16 |
| G: NMR Analysis .....                                  | 39 |
| H: Absolute Configuration and X-Ray Analysis Data..... | 62 |
| I: Reference .....                                     | 64 |

## A: General Information and Starting Materials

**General Information.** Proton nuclear magnetic resonance ( $^1\text{H}$  NMR) spectra and carbon nuclear magnetic resonance ( $^{13}\text{C}$  NMR) spectra were recorded on a Bruker ACF300 spectrometer (500 MHz and 125 MHz). Chemical shifts for protons are reported in parts per million downfield from tetramethylsilane and are referenced to residual protium in the NMR solvent ( $\text{CDCl}_3$ :  $\delta$  7.26,  $(\text{CD}_3)_2\text{SO}$ :  $\delta$  2.50). Chemical shifts for carbon are reported in parts per million downfield from tetramethylsilane and are referenced to the carbon resonances of the solvent ( $\text{CDCl}_3$ :  $\delta$  77.16,  $(\text{CD}_3)_2\text{SO}$ :  $\delta$  39.6). Data are represented as follows: chemical shift, integration, multiplicity (br = broad, s = singlet, d = doublet, t = triplet, q = quartet, m = multiplet), coupling constants in Hertz (Hz). All high resolution mass spectra were obtained on a Finnigan/MAT 95XL-T mass spectrometer. For thin layer chromatography (TLC), Merck pre-coated TLC plates (Merck 60 F254) were used, and compounds were visualized with a UV light at 254 nm. Flash chromatography separations were performed on Merck 60 (0.040-0.063 mm) mesh silica gel.

**Starting Materials.** All solvents, inorganic reagents were from commercial sources and used without purification unless otherwise noted and catalysts **4a-h** were purchased from Sigma-Aldrich. The quinone methides and azlactones were prepared following the literature procedures.<sup>1-2</sup>

## B: General Procedure for Cascade Reactions

To a solution of  $\text{CCl}_4$  (0.6 mL) were added quinone methides **1** (0.05 mmol), azlactones **2** (0.075 mmol) and catalyst **4e** (0.0025 mmol). The reaction mixture was stirred at room temperature for 48 h and then the solvent was removed under vacuum. The residue was purified by silica gel chromatography to yield the desired products.

### C: Characterization Data

#### *N*-((3*R*,4*S*)-4-(3,5-di-*tert*-butyl-4-hydroxyphenyl)-3-ethyl-2-oxochroman-3-yl)-4-methoxybenzamide (3aa)

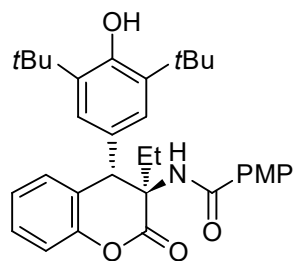

White solid, 91% yield.  $^1\text{H}$  NMR ( $\text{CDCl}_3$ , 500 MHz):  $\delta$  (ppm) 7.65 (d,  $J = 10.0$  Hz, 2H), 7.29-7.26 (m, 1H), 7.14-7.04 (m, 3H), 6.97 (s, 2H), 6.88 (d,  $J = 10.0$  Hz, 2H), 5.74 (s, 1H), 5.54 (s, 1H), 5.21 (s, 1H), 3.84 (s, 3H), 2.07-2.03 (m, 1H), 1.65-1.61 (m, 1H), 1.31 (s, 18H), 0.97 (t,  $J = 10.0$  Hz, 3H).  $^{13}\text{C}$  NMR ( $\text{CDCl}_3$ , 125 MHz):  $\delta$  (ppm) 166.6, 166.4, 162.5, 153.4, 150.9, 135.5, 129.0, 128.7, 128.4, 127.6, 126.3, 125.1, 124.7, 124.1, 116.6, 113.7, 61.9, 55.4, 46.9, 34.3, 30.2, 24.1, 8.0. HRMS (ESI): exact mass calculated for  $\text{M}^+$  ( $\text{C}_{33}\text{H}_{40}\text{NO}_5$ ) requires  $m/z$  530.2906, found  $m/z$  530.2901. The enantiomeric ratio was determined to be 97:3 by HPLC. [IC column, 254 nm, *n*-hexane:EtOH = 85:15, 0.8 mL/min]: 14.3 min (major), 21.4 min (minor).

#### *N*-((3*R*,4*S*)-4-(3,5-di-*tert*-butyl-4-hydroxyphenyl)-3-ethyl-6-fluoro-2-oxochroman-3-yl)-4-methoxybenzamide (3ba)

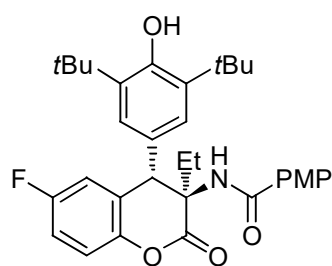

White solid, 82% yield.  $^1\text{H}$  NMR ( $\text{CDCl}_3$ , 500 MHz):  $\delta$  (ppm) 7.66 (d,  $J = 10.0$  Hz, 2H), 7.09-7.06 (m, 1H), 6.99-6.96 (m, 1H), 6.95 (s, 2H), 6.89 (d,  $J = 10.0$  Hz, 2H), 6.87-6.85 (m, 1H), 5.73 (s, 1H), 5.58 (s, 1H), 5.24 (s, 1H), 3.85 (s, 3H), 2.02-1.96 (m, 1H), 1.68-1.61 (m, 1H), 1.32 (s, 18H), 0.97 (t,  $J = 10.0$  Hz, 3H).  $^{13}\text{C}$  NMR ( $\text{CDCl}_3$ , 125 MHz):  $\delta$  (ppm) 166.6, 164.3 (d,  $J = 1700.0$  Hz), 158.0, 153.6, 146.8 (d,  $J = 10.0$  Hz), 135.7, 129.0, 127.5, 126.8 (d,  $J = 30.0$  Hz), 126.2, 124.4, 117.8 (d,  $J = 35.0$  Hz), 115.3, 115.1 (d,  $J = 25.0$  Hz), 114.9, 113.7, 61.7, 55.4, 46.7, 34.3, 30.2, 24.3, 8.0. HRMS (ESI): exact mass calculated for  $\text{M}^+$  ( $\text{C}_{33}\text{H}_{39}\text{FNO}_5$ ) requires  $m/z$  548.2812, found  $m/z$  548.2808. The enantiomeric ratio was determined to be 94:6 by HPLC. [IC column, 254 nm, *n*-hexane:EtOH = 85:15, 0.8 mL/min]: 11.8 min (major), 15.6 min (minor).

#### *N*-((3*R*,4*S*)-6-chloro-4-(3,5-di-*tert*-butyl-4-hydroxyphenyl)-3-ethyl-2-oxochroman-3-yl)-4-methoxybenzamide (3ca)

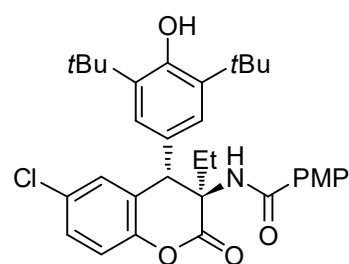

White solid, 77% yield.  $^1\text{H}$  NMR ( $\text{CDCl}_3$ , 500 MHz):  $\delta$  (ppm) 7.66 (d,  $J = 10.0$  Hz, 2H), 7.25-7.23 (m, 1H), 7.14-7.13 (m, 1H), 7.05 (d,  $J = 10.0$  Hz, 1H), 6.94 (s, 2H), 6.89 (d,  $J = 10.0$  Hz, 2H), 5.74 (s, 1H), 5.53 (s, 1H), 5.25 (s, 1H), 3.84 (s, 3H), 2.04-1.96 (m, 1H), 1.67-1.61 (m, 1H), 1.32 (s, 18H), 0.97 (t,  $J = 10.0$  Hz, 3H).  $^{13}\text{C}$  NMR ( $\text{CDCl}_3$ , 125 MHz):  $\delta$  (ppm) 166.6, 165.8, 162.6, 153.6, 149.4, 135.7, 129.3, 129.0, 128.6, 128.4, 127.5, 126.7, 126.1, 124.3, 117.9,

113.7, 61.7, 55.4, 46.8, 34.3, 30.2, 24.2, 8.0. HRMS (ESI): exact mass calculated for  $M^+$  ( $C_{33}H_{39}ClNO_5$ ) requires  $m/z$  564.2517, found  $m/z$  564.2513. The enantiomeric ratio was determined to be 98:2 by HPLC. [IC column, 254 nm, *n*-hexane:EtOH = 85:15, 0.8 mL/min]: 11.4 min (major), 15.0 min (minor).

***N*-((3*R*,4*S*)-6-bromo-4-(3,5-di-*tert*-butyl-4-hydroxyphenyl)-3-ethyl-2-oxochroman-3-yl)-4-methoxybenzamide (3da)**

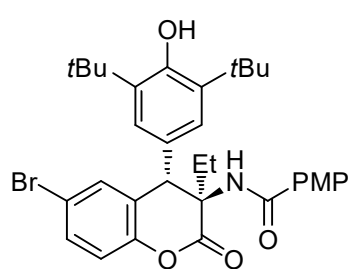

White solid, 74% yield.  $^1H$  NMR ( $CDCl_3$ , 500 MHz):  $\delta$  (ppm) 7.66 (d,  $J = 10.0$  Hz, 2H), 7.40-7.38 (m, 1H), 7.29 (s, 1H), 7.00 (d,  $J = 5.0$  Hz, 1H), 6.94 (s, 2H), 6.88 (d,  $J = 10.0$  Hz, 2H), 5.76 (s, 1H), 5.53 (s, 1H), 5.25 (s, 1H), 3.84 (s, 3H), 2.02-1.96 (m, 1H), 1.66-1.59 (m, 1H), 1.32 (s, 18H), 0.96 (t,  $J = 10.0$  Hz, 3H).  $^{13}C$  NMR ( $CDCl_3$ , 125 MHz):  $\delta$  (ppm) 166.6, 165.8, 162.6, 153.6, 150.0, 135.7, 131.5, 131.3, 129.0, 127.5, 127.1, 126.1, 124.3, 118.3, 116.8, 113.7, 61.7, 55.4, 46.7, 34.3, 30.2, 24.2, 7.9. HRMS (ESI): exact mass calculated for  $M^+$  ( $C_{33}H_{39}BrNO_5$ ) requires  $m/z$  608.2012, found  $m/z$  608.2009. The enantiomeric ratio was determined to be 97:3 by HPLC. [IC column, 254 nm, *n*-hexane:EtOH = 85:15, 0.8 mL/min]: 11.7 min (major), 15.6 min (minor).

***N*-((3*R*,4*S*)-4-(3,5-di-*tert*-butyl-4-hydroxyphenyl)-3-ethyl-6-methyl-2-oxochroman-3-yl)-4-methoxybenzamide (3ea)**

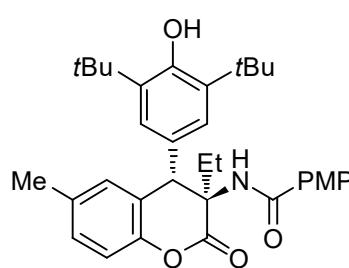

White solid, 87% yield.  $^1H$  NMR ( $CDCl_3$ , 500 MHz):  $\delta$  (ppm) 7.65 (d,  $J = 10.0$  Hz, 2H), 7.07-7.05 (m, 1H), 7.00-6.99 (m, 1H), 6.97 (s, 2H), 6.95 (s, 1H), 6.88 (d,  $J = 10.0$  Hz, 2H), 5.72 (s, 1H), 5.46 (s, 1H), 5.21 (s, 1H), 3.84 (s, 3H), 2.25 (s, 3H), 2.09-2.01 (m, 1H), 1.64-1.56 (m, 1H), 1.32 (s, 18H), 0.96 (t,  $J = 10.0$  Hz, 3H).  $^{13}C$  NMR ( $CDCl_3$ , 125 MHz):  $\delta$  (ppm) 166.6, 166.5, 162.4, 153.4, 148.8, 135.4, 133.7, 129.1, 129.0, 128.8, 127.5, 126.4, 125.2, 124.2, 116.3, 113.7, 62.0, 55.4, 46.9, 34.3, 30.3, 24.0, 20.8, 8.0. HRMS (ESI): exact mass calculated for  $M^+$  ( $C_{34}H_{42}NO_5$ ) requires  $m/z$  544.3063, found  $m/z$  544.3059. The enantiomeric ratio was determined to be 97:3 by HPLC. [IC column, 254 nm, *n*-hexane:EtOH = 85:15, 0.8 mL/min]: 17.4 min (major), 20.1 min (minor).

***N*-((3*R*,4*S*)-4-(3,5-di-*tert*-butyl-4-hydroxyphenyl)-3-ethyl-7-methoxy-2-oxochroman-3-yl)-4-methoxybenzamide (3fa)**

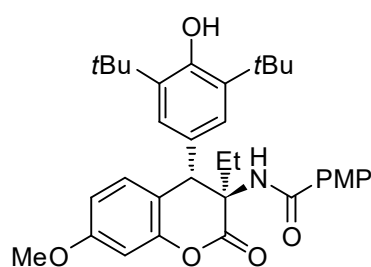

White solid, 85% yield.  $^1H$  NMR ( $CDCl_3$ , 500 MHz):  $\delta$  (ppm) 7.65 (d,  $J = 10.0$  Hz, 2H), 7.02 (d,  $J = 10.0$  Hz, 1H), 6.95 (s, 2H), 6.88 (d,  $J = 10.0$  Hz, 2H), 6.67 (s, 1H), 6.62-6.60 (m, 1H), 5.73 (s, 1H), 5.41 (s, 1H), 5.20 (s, 1H), 3.84 (s, 3H), 3.80 (s, 3H), 2.10-2.03 (m, 1H),

1.61-1.55 (m, 1H), 1.31 (s, 18H), 0.96 (t,  $J = 10.0$  Hz, 3H).  $^{13}\text{C}$  NMR ( $\text{CDCl}_3$ , 125 MHz):  $\delta$  (ppm) 166.5, 166.4, 162.5, 159.7, 153.3, 151.6, 135.4, 129.3, 129.0, 127.5, 126.4, 125.5, 116.4, 113.7, 110.2, 102.0, 62.0, 55.5, 55.4, 46.3, 34.3, 30.2, 24.6, 8.0. HRMS (ESI): exact mass calculated for  $\text{M}^+$  ( $\text{C}_{34}\text{H}_{42}\text{NO}_6$ ) requires  $m/z$  560.3012, found  $m/z$  560.3010. The enantiomeric ratio was determined to be 94:6 by HPLC. [IC column, 254 nm, *n*-hexane:EtOH = 85:15, 0.8 mL/min]: 14.7 min (major), 26.3 min (minor).

***N*-((1*S*,2*R*)-1-(3,5-di-*tert*-butyl-4-hydroxyphenyl)-2-ethyl-3-oxo-2,3-dihydro-1*H*-benzo[*f*]chromen-2-yl)-4-methoxybenzamide (3ga)**

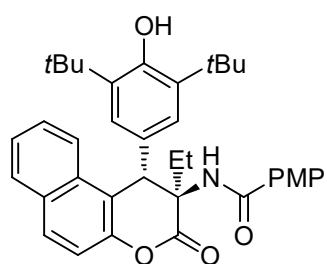

White solid, 89% yield.  $^1\text{H}$  NMR ( $\text{CDCl}_3$ , 500 MHz):  $\delta$  (ppm) 7.94-7.92 (m, 1H), 7.83-7.79 (m, 2H), 7.52-7.49 (m, 1H), 7.42-7.39 (m, 1H), 7.33-7.28 (m, 3H), 7.05 (s, 2H), 6.71-6.67 (m, 2H), 5.88 (s, 1H), 5.16 (s, 1H), 4.90 (s, 1H), 3.73 (s, 3H), 2.64-2.57 (m, 1H), 1.65-1.58 (m, 1H), 1.36 (s, 18H), 1.10 (t,  $J = 10.0$  Hz, 3H).  $^{13}\text{C}$  NMR ( $\text{CDCl}_3$ , 125 MHz):  $\delta$  (ppm) 166.6, 166.3, 162.3, 153.5, 149.6, 136.2, 131.5, 130.9, 129.9, 128.9, 128.7, 127.3, 126.2, 125.8, 125.1, 124.9, 122.8, 117.0, 113.7, 113.6, 61.1, 55.3, 48.2, 34.3, 30.2, 22.8, 7.6. HRMS (ESI): exact mass calculated for  $\text{M}^+$  ( $\text{C}_{37}\text{H}_{42}\text{NO}_5$ ) requires  $m/z$  580.3063, found  $m/z$  580.3059. The enantiomeric ratio was determined to be 82:18 by HPLC. [IC column, 254 nm, *n*-hexane:EtOH = 85:15, 0.8 mL/min]: 9.9 min (minor), 17.1 min (major).

***N*-((3*R*,4*S*)-4-(3,5-di-*tert*-butyl-4-hydroxyphenyl)-2-oxo-3-propylchroman-3-yl)-4-methoxybenzamide (3ab)**

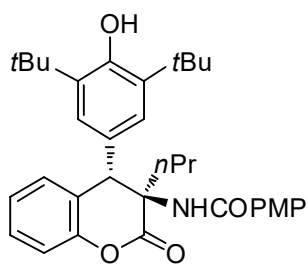

White solid, 87% yield.  $^1\text{H}$  NMR ( $\text{CDCl}_3$ , 500 MHz):  $\delta$  (ppm) 7.64 (d,  $J = 10.0$  Hz, 2H), 7.30-7.26 (m, 1H), 7.14-7.10 (m, 2H), 7.08-7.05 (m, 1H), 6.97 (s, 2H), 6.88 (d,  $J = 10.0$  Hz, 2H), 5.76 (s, 1H), 5.50 (s, 1H), 5.22 (s, 1H), 3.84 (s, 3H), 1.99-1.92 (m, 1H), 1.54-1.48 (m, 1H), 1.44-1.36 (m, 2H), 1.32 (s, 18H), 0.86 (t,  $J = 10.0$  Hz, 3H).  $^{13}\text{C}$  NMR ( $\text{CDCl}_3$ , 125 MHz):  $\delta$  (ppm) 166.7, 166.5, 162.5, 153.4, 150.9, 135.5, 129.0, 128.6, 128.4, 127.5, 126.3, 125.1, 124.7, 124.2, 116.6, 113.7, 61.6, 55.4, 47.0, 34.3, 33.8, 30.2, 16.8, 14.1. HRMS (ESI): exact mass calculated for  $\text{M}^+$  ( $\text{C}_{34}\text{H}_{42}\text{NO}_5$ ) requires  $m/z$  544.3063, found  $m/z$  544.3061. The enantiomeric ratio was determined to be 92:8 by HPLC. [IA column, 254 nm, *n*-hexane:EtOH = 9:1, 0.8 mL/min]: 12.1 min (minor), 14.9 min (major).

***N*-((3*R*,4*S*)-4-(3,5-di-*tert*-butyl-4-hydroxyphenyl)-3-isopropyl-2-oxochroman-3-yl)-4-methoxybenzamide (3ac)**

White solid, 72% yield.  $^1\text{H}$  NMR ( $\text{CDCl}_3$ , 500 MHz):  $\delta$  (ppm) 7.62 (d,  $J = 10.0$  Hz, 2H), 7.24-7.21 (m, 1H), 7.09-7.07 (m, 2H), 7.04-7.01 (m, 3H), 6.88 (d,  $J = 10.0$  Hz,

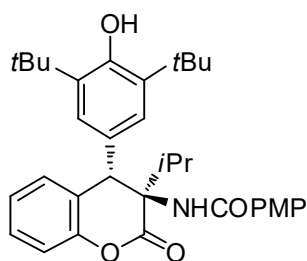

2H), 5.85 (s, 1H), 5.36 (s, 1H), 5.23 (s, 1H), 3.84 (s, 3H), 2.16-2.10 (m, 1H), 1.32 (s, 18H), 1.05 (d,  $J = 10.0$  Hz, 3H), 1.01 (d,  $J = 10.0$  Hz, 3H).  $^{13}\text{C}$  NMR ( $\text{CDCl}_3$ , 125 MHz):  $\delta$  (ppm) 166.0, 165.7, 162.5, 153.4, 151.2, 135.7, 128.8, 128.2, 127.3, 127.2, 126.2, 125.9, 125.3, 124.1, 116.4, 113.8, 63.6, 55.4, 48.0, 34.3, 31.9, 30.2, 18.8, 18.0. HRMS (ESI): exact mass calculated for  $\text{M}^+$  ( $\text{C}_{34}\text{H}_{42}\text{NO}_5$ ) requires  $m/z$  544.3063, found  $m/z$  544.3058. The enantiomeric ratio was determined to be 96:4 by HPLC. [IC column, 254 nm,  $n$ -hexane:EtOH = 85:15, 0.8 mL/min]: 16.3 min (major), 19.1 min (minor).

***N*-((3*R*,4*S*)-4-(3,5-di-*tert*-butyl-4-hydroxyphenyl)-3-isobutyl-2-oxochroman-3-yl)-4-methoxybenzamide (3ad)**

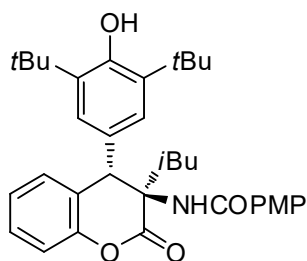

White solid, 87% yield.  $^1\text{H}$  NMR ( $\text{CDCl}_3$ , 500 MHz):  $\delta$  (ppm) 7.64 (d,  $J = 10.0$  Hz, 2H), 7.30-7.27 (m, 1H), 7.12-7.10 (m, 2H), 7.08-7.05 (m, 1H), 6.96 (s, 2H), 6.89 (d,  $J = 10.0$  Hz, 2H), 5.74 (s, 1H), 5.64 (s, 1H), 5.21 (s, 1H), 3.84 (s, 3H), 1.98-1.94 (m, 2H), 1.87-1.79 (m, 1H), 1.31 (s, 18H), 1.00 (d,  $J = 5.0$  Hz, 3H), 0.88 (d,  $J = 5.0$  Hz, 3H).  $^{13}\text{C}$  NMR ( $\text{CDCl}_3$ , 125 MHz):  $\delta$  (ppm) 166.4, 166.2, 162.4, 153.4, 150.8, 135.3, 128.9, 128.7, 128.4, 127.8, 126.5, 124.9, 124.8, 124.1, 116.5, 113.7, 61.8, 55.4, 47.0, 40.1, 34.3, 30.3, 24.3, 24.2, 24.1. HRMS (ESI): exact mass calculated for  $\text{M}^+$  ( $\text{C}_{34}\text{H}_{44}\text{NO}_5$ ) requires  $m/z$  558.3219, found  $m/z$  558.3215. The enantiomeric ratio was determined to be 91:9 by HPLC. [IC column, 254 nm,  $n$ -hexane:EtOH = 85:15, 0.8 mL/min]: 10.8 min (minor), 13.9 min (major).

***N*-((3*S*,4*S*)-4-(3,5-di-*tert*-butyl-4-hydroxyphenyl)-2-oxo-3-phenylchroman-3-yl)-4-methoxybenzamide (3ae)**

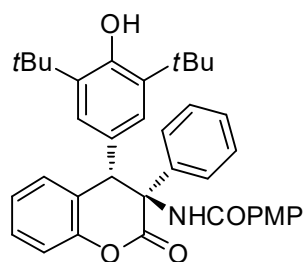

White solid, 88% yield.  $^1\text{H}$  NMR ( $\text{CDCl}_3$ , 500 MHz):  $\delta$  (ppm) 7.74 (d,  $J = 10.0$  Hz, 2H), 7.31-7.29 (m, 1H), 7.26-7.25 (m, 1H), 7.18-7.15 (m, 2H), 7.02-7.00 (m, 2H), 6.93 (d,  $J = 10.0$  Hz, 2H), 6.78 (d,  $J = 10.0$  Hz, 2H), 6.50-6.49 (m, 3H), 5.90 (s, 1H), 5.19 (s, 1H), 3.86 (s, 3H), 1.21 (s, 18H).  $^{13}\text{C}$  NMR ( $\text{CDCl}_3$ , 125 MHz):  $\delta$  (ppm) 167.9, 167.4, 162.7, 153.5, 151.1, 135.1, 134.7, 129.1, 128.9, 128.7, 128.5, 128.4, 126.7, 126.4, 124.5, 124.3, 124.0, 116.8, 113.8, 66.4, 55.4, 48.4, 34.1, 30.1. HRMS (ESI): exact mass calculated for  $\text{M}^+$  ( $\text{C}_{37}\text{H}_{40}\text{NO}_5$ ) requires  $m/z$  578.2906, found  $m/z$  578.2902. The enantiomeric ratio was determined to be 97:3 by HPLC. [IC column, 254 nm,  $n$ -hexane:EtOH = 85:15, 0.8 mL/min]: 15.6 min (major), 25.5 min (minor).

***N*-((3*R*,4*S*)-3-benzyl-4-(3,5-di-*tert*-butyl-4-hydroxyphenyl)-2-oxochroman-3-yl)-4-methoxybenzamide (3af)**

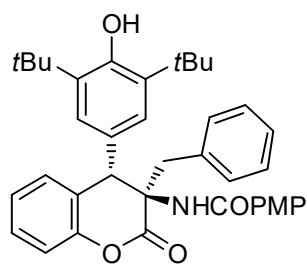

White solid, 83% yield.  $^1\text{H}$  NMR ( $\text{CDCl}_3$ , 500 MHz):  $\delta$  (ppm) 7.47 (d,  $J = 10.0$  Hz, 2H), 7.31-7.27 (m, 4H), 7.19-7.16 (m, 2H), 7.10 (s, 2H), 7.08-7.05 (m, 3H), 6.83 (d,  $J = 10.0$  Hz, 2H), 5.81 (s, 1H), 5.40 (s, 1H), 5.26 (s, 1H), 3.82 (s, 3H), 3.47 (d,  $J = 15.0$  Hz, 1H), 2.92 (d,  $J = 15.0$  Hz, 1H), 1.37 (s, 18H).  $^{13}\text{C}$  NMR ( $\text{CDCl}_3$ , 125 MHz):  $\delta$  (ppm) 166.7, 166.2, 162.4, 153.5, 150.9, 135.7, 134.1, 130.4, 128.9, 128.8, 128.7, 128.6, 127.7, 127.3, 126.4, 125.6, 124.7, 124.2, 116.6, 113.7, 61.8, 55.4, 48.1, 36.2, 34.4, 30.3. HRMS (ESI): exact mass calculated for  $\text{M}^+$  ( $\text{C}_{38}\text{H}_{42}\text{NO}_5$ ) requires  $m/z$  592.3063, found  $m/z$  592.3057. The enantiomeric ratio was determined to be 99:1 by HPLC. [IC column, 254 nm,  $n$ -hexane:EtOH = 85:15, 0.8 mL/min]: 13.7 min (major), 16.7 min (minor).

***N*-((3*R*,4*S*)-4-(3,5-di-*tert*-butyl-4-hydroxyphenyl)-3-(2-(methylthio)ethyl)-2-oxochroman-3-yl)-4-methoxybenzamide (3ag)**

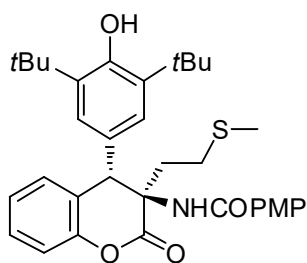

White solid, 86% yield.  $^1\text{H}$  NMR ( $\text{CDCl}_3$ , 500 MHz):  $\delta$  (ppm) 7.68 (d,  $J = 10.0$  Hz, 2H), 7.30-7.27 (m, 1H), 7.16-7.06 (m, 3H), 6.97 (s, 2H), 6.88 (d,  $J = 10.0$  Hz, 2H), 6.70 (s, 1H), 5.58 (s, 1H), 5.23 (s, 1H), 3.84 (s, 3H), 2.67-2.56 (m, 2H), 2.27-2.21 (m, 1H), 2.01 (s, 3H), 1.98-1.92 (m, 1H), 1.31 (s, 18H).  $^{13}\text{C}$  NMR ( $\text{CDCl}_3$ , 125 MHz):  $\delta$  (ppm) 166.5, 166.4, 162.5, 153.5, 150.7, 135.6, 129.1, 128.7, 128.5, 127.6, 126.0, 124.7, 124.4, 124.3, 116.6, 113.7, 62.0, 55.4, 47.0, 34.3, 30.2, 29.3, 28.0, 15.6. HRMS (ESI): exact mass calculated for  $\text{M}^+$  ( $\text{C}_{34}\text{H}_{42}\text{NO}_5\text{S}$ ) requires  $m/z$  576.2784, found  $m/z$  576.2780. The enantiomeric ratio was determined to be 91:9 by HPLC. [IC column, 254 nm,  $n$ -hexane:EtOH = 85:15, 0.8 mL/min]: 13.5 min (major), 15.6 min (minor).

***N*-((3*R*,4*S*)-4-(3,5-di-*tert*-butyl-4-hydroxyphenyl)-3-ethyl-2-oxochroman-3-yl)-4-fluorobenzamide (3ah)**

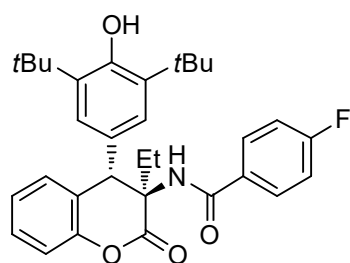

White solid, 72% yield.  $^1\text{H}$  NMR ( $\text{CDCl}_3$ , 500 MHz):  $\delta$  (ppm) 7.71-7.68 (m, 2H), 7.30-7.27 (m, 1H), 7.14-7.10 (m, 2H), 7.08-7.05 (m, 3H), 6.97 (s, 2H), 5.81 (s, 1H), 5.54 (s, 1H), 5.23 (s, 1H), 2.10-2.02 (m, 1H), 1.68-1.64 (m, 1H), 1.32 (s, 18H), 0.97 (t,  $J = 10.0$  Hz, 3H).  $^{13}\text{C}$  NMR ( $\text{CDCl}_3$ , 125 MHz):  $\delta$  (ppm) 166.2, 166.0, 164.9 (d,  $J = 1000.0$  Hz), 153.5, 150.8, 135.6, 130.2 (d,  $J = 10.0$  Hz), 129.5 (d,  $J = 35.0$  Hz), 128.6 (d,  $J = 100.0$  Hz), 127.5, 124.9, 124.6, 124.2, 116.6, 115.7, 115.5, 62.2, 46.8, 34.3, 30.2, 24.1, 8.0. HRMS (ESI): exact mass calculated for  $\text{M}^+$  ( $\text{C}_{32}\text{H}_{37}\text{FNO}_4$ ) requires  $m/z$  518.2707, found  $m/z$  518.2701. The enantiomeric ratio was determined to be 96:4 by HPLC. [IC column, 254 nm,  $n$ -hexane:EtOH = 85:15, 0.8 mL/min]: 6.5 min (major), 9.1 min (minor).

**4-Chloro-*N*-((3*R*,4*S*)-4-(3,5-di-*tert*-butyl-4-hydroxyphenyl)-3-ethyl-2-oxochroman-3-yl)benzamide (3ai)**

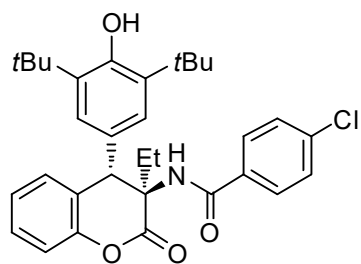

White solid, 85% yield.  $^1\text{H}$  NMR ( $\text{CDCl}_3$ , 500 MHz):  $\delta$  (ppm) 7.62-7.60 (m, 2H), 7.37-7.35 (m, 2H), 7.30-7.26 (m, 1H), 7.14-7.10 (m, 2H), 7.08-7.05 (m, 1H), 6.96 (s, 2H), 5.84 (s, 1H), 5.52 (s, 1H), 5.23 (s, 1H), 2.10-2.03 (m, 1H), 1.69-1.63 (m, 1H), 1.32 (s, 18H), 0.97 (t,  $J = 5.0$  Hz, 3H).  $^{13}\text{C}$  NMR ( $\text{CDCl}_3$ , 125 MHz):  $\delta$  (ppm) 166.2, 166.1, 153.5, 150.8, 138.1, 135.6, 132.5, 128.8, 128.7, 128.6, 128.5, 127.5, 124.9, 124.6, 124.3, 116.6, 62.2, 46.8, 34.3, 30.2, 24.1, 8.0. HRMS (ESI): exact mass calculated for  $\text{M}^+$  ( $\text{C}_{32}\text{H}_{37}\text{ClNO}_4$ ) requires  $m/z$  534.2411, found  $m/z$  534.2407. The enantiomeric ratio was determined to be 97:3 by HPLC. [IC column, 254 nm, *n*-hexane:EtOH = 85:15, 0.8 mL/min]: 6.5 min (major), 9.1 min (minor).

***N*-((3*R*,4*S*)-4-(3,5-di-*tert*-butyl-4-hydroxyphenyl)-3-ethyl-2-oxochroman-3-yl)-4-methylbenzamide (3aj)**

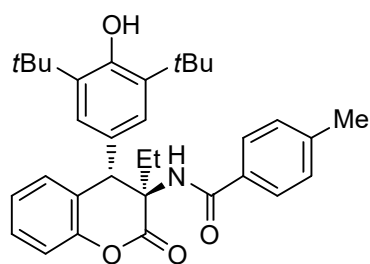

White solid, 87% yield.  $^1\text{H}$  NMR ( $\text{CDCl}_3$ , 500 MHz):  $\delta$  (ppm) 7.57 (d,  $J = 10.0$  Hz, 2H), 7.29-7.28 (m, 1H), 7.19 (d,  $J = 10.0$  Hz, 2H), 7.14-7.10 (m, 2H), 7.07-7.04 (m, 1H), 6.97 (s, 2H), 5.79 (s, 1H), 5.53 (s, 1H), 5.21 (s, 1H), 2.38 (s, 3H), 2.10-2.02 (m, 1H), 1.67-1.63 (m, 1H), 1.32 (s, 18H), 0.97 (t,  $J = 10.0$  Hz, 3H).  $^{13}\text{C}$  NMR ( $\text{CDCl}_3$ , 125 MHz):  $\delta$  (ppm) 167.1, 166.3, 153.4, 150.9, 142.3, 135.5, 131.2, 129.1, 128.7, 128.4, 127.6, 127.1, 125.1, 124.7, 124.1, 116.6, 62.0, 46.9, 34.3, 30.2, 24.1, 24.5, 8.0. HRMS (ESI): exact mass calculated for  $\text{M}^+$  ( $\text{C}_{33}\text{H}_{40}\text{NO}_4$ ) requires  $m/z$  514.2957, found  $m/z$  514.2950. The enantiomeric ratio was determined to be 95:5 by HPLC. [IC column, 254 nm, *n*-hexane:EtOH = 85:15, 0.8 mL/min]: 10.3 min (major), 12.9 min (minor).

**3-Chloro-*N*-((3*R*,4*S*)-4-(3,5-di-*tert*-butyl-4-hydroxyphenyl)-3-ethyl-2-oxochroman-3-yl)benzamide (3ak)**

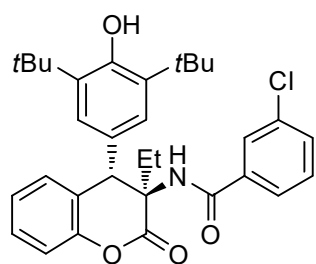

White solid, 91% yield.  $^1\text{H}$  NMR ( $\text{CDCl}_3$ , 500 MHz):  $\delta$  (ppm) 7.62 (s, 1H), 7.57-7.55 (m, 1H), 7.47-7.45 (m, 1H), 7.35-7.26 (m, 2H), 7.14-7.10 (m, 2H), 7.08-7.05 (m, 1H), 6.97 (s, 2H), 5.85 (s, 1H), 5.52 (s, 1H), 5.24 (s, 1H), 2.09-2.04 (m, 1H), 1.70-1.66 (m, 1H), 1.33 (s, 18H), 0.97 (t,  $J = 10.0$  Hz, 3H).  $^{13}\text{C}$  NMR ( $\text{CDCl}_3$ , 125 MHz):  $\delta$  (ppm) 166.1, 165.9, 153.5, 150.8, 135.9, 135.6, 134.6, 131.9, 129.9, 128.7, 128.5, 127.5, 127.3, 125.4, 124.9, 124.5, 124.3, 116.6, 62.3, 46.7, 34.3, 30.2, 24.1, 8.0. HRMS (ESI): exact mass calculated for  $\text{M}^+$  ( $\text{C}_{32}\text{H}_{37}\text{ClNO}_4$ ) requires  $m/z$  534.2411, found  $m/z$  534.2406. The enantiomeric ratio was determined to be 92:8



by HPLC. [IC column, 254 nm, *n*-hexane:EtOH = 9:1, 0.8 mL/min]: 9.0 min (major), 12.5 min (minor).

**3-Bromo-*N*-((3*R*,4*S*)-4-(3,5-di-*tert*-butyl-4-hydroxyphenyl)-3-ethyl-2-oxochroman-3-yl)benzamide (3al)**

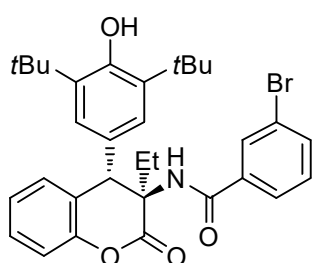

White solid, 87% yield. <sup>1</sup>H NMR (CDCl<sub>3</sub>, 500 MHz): δ (ppm) 7.77 (s, 1H), 7.63-7.61 (m, 2H), 7.30-7.26 (m, 2H), 7.14-7.10 (m, 2H), 7.08-7.05 (m, 1H), 6.97 (s, 2H), 5.82 (s, 1H), 5.52 (s, 1H), 5.24 (s, 1H), 2.09-2.04 (m, 1H), 1.69-1.64 (m, 1H), 1.33 (s, 18H), 0.97 (t, *J* = 10.0 Hz, 3H). <sup>13</sup>C NMR (CDCl<sub>3</sub>, 125 MHz): δ (ppm) 166.0, 165.8, 153.5, 150.8, 136.2, 135.6, 134.8, 130.2, 130.1, 128.7, 128.5, 127.5, 125.9, 124.9, 124.5, 124.3, 122.6, 116.6, 62.3, 46.7, 34.3, 30.2, 24.1, 8.0. HRMS (ESI): exact mass calculated for M<sup>+</sup> (C<sub>32</sub>H<sub>37</sub>BrNO<sub>4</sub>) requires *m/z* 578.1906, found *m/z* 578.1901. The enantiomeric ratio was determined to be 93:7 by HPLC. [IC column, 254 nm, *n*-hexane:EtOH = 9:1, 0.8 mL/min]: 9.5 min (major), 13.5 min (minor).

***N*-((3*R*,4*S*)-4-(3,5-di-*tert*-butyl-4-hydroxyphenyl)-3-ethyl-2-oxochroman-3-yl)-3-methylbenzamide (3am)**

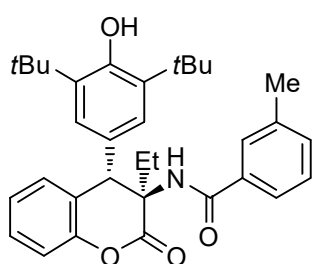

White solid, 94% yield. <sup>1</sup>H NMR (CDCl<sub>3</sub>, 500 MHz): δ (ppm) 7.50 (s, 1H), 7.44-7.42 (m, 1H), 7.31-7.25 (m, 3H), 7.14-7.11 (m, 2H), 7.08-7.05 (m, 1H), 6.98 (s, 2H), 5.79 (s, 1H), 5.55 (s, 1H), 5.22 (s, 1H), 2.36 (s, 3H), 2.10-2.02 (m, 1H), 1.68-1.62 (m, 1H), 1.32 (s, 18H), 0.98 (t, *J* = 10.0 Hz, 3H). <sup>13</sup>C NMR (CDCl<sub>3</sub>, 125 MHz): δ (ppm) 167.4, 166.2, 153.4, 150.9, 138.4, 135.5, 134.1, 132.6, 128.7, 128.4, 128.3, 127.8, 127.6, 125.1, 124.7, 124.2, 124.1, 116.6, 62.0, 46.8, 34.3, 30.2, 24.1, 21.3, 8.0. HRMS (ESI): exact mass calculated for M<sup>+</sup> (C<sub>33</sub>H<sub>40</sub>NO<sub>4</sub>) requires *m/z* 514.2957, found *m/z* 514.2952. The enantiomeric ratio was determined to be 92:8 by HPLC. [IC column, 254 nm, *n*-hexane:EtOH = 85:15, 0.8 mL/min]: 9.3 min (major), 11.4 min (minor).

**2-Bromo-*N*-((3*R*,4*S*)-4-(3,5-di-*tert*-butyl-4-hydroxyphenyl)-3-ethyl-2-oxochroman-3-yl)benzamide (3an)**

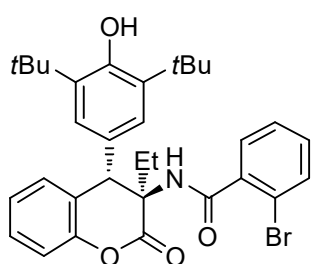

White solid, 92% yield. <sup>1</sup>H NMR (CDCl<sub>3</sub>, 500 MHz): δ (ppm) 7.55-7.52 (m, 2H), 7.33-7.28 (m, 2H), 7.25-7.23 (m, 1H), 7.14-7.13 (m, 1H), 7.08-7.04 (m, 2H), 7.00 (s, 2H), 6.06 (s, 1H), 5.24 (s, 1H), 5.22 (s, 1H), 2.24-2.17 (m, 1H), 1.74-1.66 (m, 1H), 1.37 (s, 18H), 1.02 (t, *J* = 10.0 Hz, 3H). <sup>13</sup>C NMR (CDCl<sub>3</sub>, 125 MHz): δ (ppm) 166.3, 165.9, 153.5, 151.1, 136.2, 135.8, 133.7, 131.8, 130.7, 129.0, 128.6,

127.5, 126.9, 125.6, 125.0, 124.3, 119.3, 116.5, 62.7, 48.1, 34.3, 30.3, 23.9, 8.1. HRMS (ESI): exact mass calculated for  $M^+$  ( $C_{32}H_{37}BrNO_4$ ) requires  $m/z$  578.1906, found  $m/z$  578.1900. The enantiomeric ratio was determined to be 93:7 by HPLC. [IC column, 254 nm, *n*-hexane:EtOH = 85:15, 0.8 mL/min]: 9.2 min (major), 13.6 min (minor).

***N*-((3*R*,4*S*)-4-(3,5-di-*tert*-butyl-4-hydroxyphenyl)-3-ethyl-2-oxochroman-3-yl)-2-naphthamide (3ao)**

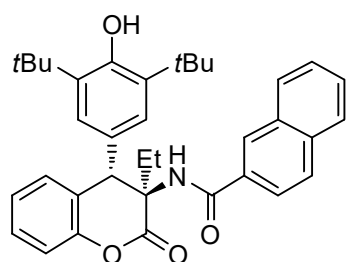

White solid, 91% yield.  $^1H$  NMR ( $CDCl_3$ , 500 MHz):  $\delta$  (ppm) 8.15 (s, 1H), 7.86-7.84 (m, 3H), 7.74-7.72 (m, 1H), 7.57-7.50 (m, 2H), 7.31-7.28 (m, 1H), 7.17-7.13 (m, 2H), 7.09-7.06 (m, 1H), 7.03 (s, 2H), 6.01 (s, 1H), 5.60 (s, 1H), 5.22 (s, 1H), 2.16-2.08 (m, 1H), 1.75-1.68 (m, 1H), 1.31 (s, 18H), 1.02 (t,  $J$  = 10.0 Hz, 3H).  $^{13}C$  NMR ( $CDCl_3$ , 125 MHz):  $\delta$  (ppm) 167.4, 166.3, 153.5, 150.9, 135.6, 134.9, 132.4, 131.4, 128.8, 128.7, 128.5, 128.4, 127.8, 127.7, 127.6, 127.5, 126.8, 125.1, 124.7, 124.2, 123.6, 116.6, 62.2, 47.0, 34.3, 30.2, 24.2, 8.1. HRMS (ESI): exact mass calculated for  $M^+$  ( $C_{36}H_{40}NO_4$ ) requires  $m/z$  550.2957, found  $m/z$  550.2951. The enantiomeric ratio was determined to be 94:6 by HPLC. [IC column, 254 nm, *n*-hexane:EtOH = 85:15, 0.8 mL/min]: 9.6 min (major), 12.7 min (minor).

***N*-((3*R*,4*S*)-4-(3,5-di-*tert*-butyl-4-hydroxyphenyl)-3-ethyl-2-oxochroman-3-yl)furan-2-carboxamide (3ap)**

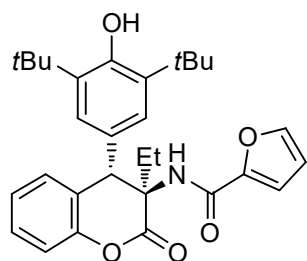

White solid, 91% yield.  $^1H$  NMR ( $CDCl_3$ , 500 MHz):  $\delta$  (ppm) 7.37 (s, 1H), 7.30-7.27 (m, 1H), 7.21-7.20 (m, 1H), 7.18-7.16 (m, 1H), 7.11 (d,  $J$  = 10.0 Hz, 1H), 7.08-7.05 (m, 1H), 6.96 (s, 2H), 6.51 (s, 1H), 6.04 (s, 1H), 5.52 (s, 1H), 5.21 (s, 1H), 2.04-1.97 (m, 1H), 1.62-1.55 (m, 1H), 1.31 (s, 18H), 0.96 (t,  $J$  = 10.0 Hz, 3H).  $^{13}C$  NMR ( $CDCl_3$ , 125 MHz):  $\delta$  (ppm) 166.1, 157.7, 153.4, 150.8, 147.5, 143.8, 135.4, 128.7, 128.4, 127.6, 124.7, 124.3, 124.2, 116.6, 115.2, 112.4, 61.8, 46.7, 34.3, 30.2, 24.0, 7.9. HRMS (ESI): exact mass calculated for  $M^+$  ( $C_{30}H_{36}NO_5$ ) requires  $m/z$  490.2593, found  $m/z$  490.2589. The enantiomeric ratio was determined to be 91:9 by HPLC. [IC column, 254 nm, *n*-hexane:EtOH = 85:15, 0.8 mL/min]: 11.1 min (major), 16.1 min (minor).

***N*-((3*R*,4*S*)-4-(3,5-di-*tert*-butyl-4-hydroxyphenyl)-3-ethyl-2-oxochroman-3-yl)thiophene-2-carboxamide (3aq)**

White solid, 98% yield.  $^1H$  NMR ( $CDCl_3$ , 500 MHz):  $\delta$  (ppm) 7.48-7.47 (m, 1H), 7.43-7.42 (m, 1H), 7.29-7.26 (m, 1H), 7.15-7.14 (m, 1H), 7.11-7.10 (m, 1H), 7.08-7.05 (m, 1H), 7.05-7.02 (m, 1H), 6.98 (s, 2H), 5.67 (s, 1H), 5.52 (s, 1H), 5.22 (s, 1H), 2.07-2.00 (m, 1H), 1.65-1.57 (m, 1H), 1.31 (s, 18H), 0.97 (t,  $J$  = 10.0 Hz, 3H).

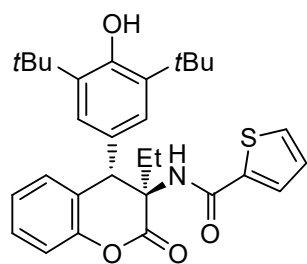

10.0 min (major), 13.0 min (minor).

$^{13}\text{C}$  NMR ( $\text{CDCl}_3$ , 125 MHz):  $\delta$  (ppm) 166.1, 161.4, 153.5, 150.8, 138.1, 135.5, 130.5, 128.8, 128.7, 128.5, 127.6, 127.5, 124.8, 124.5, 124.2, 116.6, 62.2, 46.8, 34.3, 30.2, 24.1, 8.0. HRMS (ESI): exact mass calculated for  $\text{M}^+$  ( $\text{C}_{30}\text{H}_{30}\text{NO}_4\text{S}$ ) requires  $m/z$  506.2365, found  $m/z$  506.2360. The enantiomeric ratio was determined to be 94:6 by HPLC. [IC column, 254 nm, *n*-hexane:EtOH = 85:15, 0.8 mL/min]:

#### D: De-*tert*-butylation reaction.

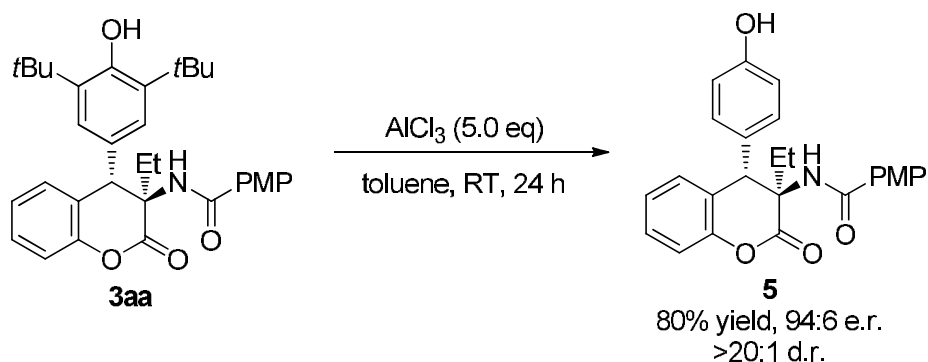

To a solution of **3aa** (17.1 mg, 0.032 mmol) in dry toluene (1.5 mL) was added  $\text{AlCl}_3$  (21.5 mg, 5.0 eq) in one portion. The reaction solution was stirred at room temperature for 24 h and 1.5 mL  $\text{H}_2\text{O}$  was added to quench the reaction. The aqueous phase was extracted with  $\text{CH}_2\text{Cl}_2$  ( $3 \times 1.0$  mL) and the organic layer was dried with anhydrous  $\text{Na}_2\text{SO}_4$  and reduced in vacuum to give a residue, which was purified by column chromatography to afford the product **5** as a white solid (10.7 mg, 80% yield, 94:6 e.r., >20:1 d.r.).

#### *N*-((3*R*,4*S*)-3-ethyl-4-(4-hydroxyphenyl)-2-oxochroman-3-yl)-4-methoxybenzamide (**5**)

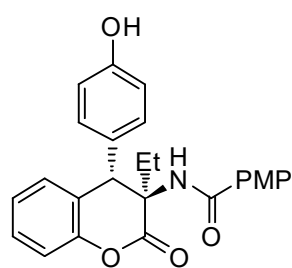

White solid, 80% yield.  $^1\text{H}$  NMR ( $(\text{CD}_3)_2\text{SO}$ , 500 MHz):  $\delta$  (ppm) 9.46 (s, 1H), 8.13 (s, 1H), 7.56 (d,  $J = 10.0$  Hz, 2H), 7.25-7.22 (m, 1H), 7.10-7.04 (m, 3H), 6.92 (d,  $J = 10.0$  Hz, 2H), 6.87 (d,  $J = 10.0$  Hz, 2H), 6.70 (d,  $J = 10.0$  Hz, 2H), 4.89 (s, 1H), 3.75 (s, 3H), 1.96-1.88 (m, 1H), 1.51-1.44 (m, 1H), 0.89 (t,  $J = 10.0$  Hz, 3H).  $^{13}\text{C}$  NMR ( $(\text{CD}_3)_2\text{SO}$ , 125 MHz):  $\delta$  (ppm) 167.1, 166.4, 162.2, 157.3, 151.6, 130.7, 129.8, 129.7, 128.8, 127.2, 126.3, 125.9, 124.4, 115.9, 115.8, 113.9, 61.1, 55.8, 48.4, 24.5, 8.3. HRMS (ESI): exact mass calculated for  $\text{M}^+$  ( $\text{C}_{25}\text{H}_{24}\text{NO}_5$ ) requires  $m/z$  418.1654, found  $m/z$  418.1650. The enantiomeric ratio was determined to be 94:6 by HPLC. [IC column, 254 nm, *n*-hexane:EtOH = 85:15, 0.8 mL/min]: 19.8 min (major), 25.0 min (minor).

***N*-((3*R*,4*S*)-3-ethyl-4-(4-hydroxyphenyl)-2-oxochroman-3-yl)-4-methoxybenzamide  
(5)**

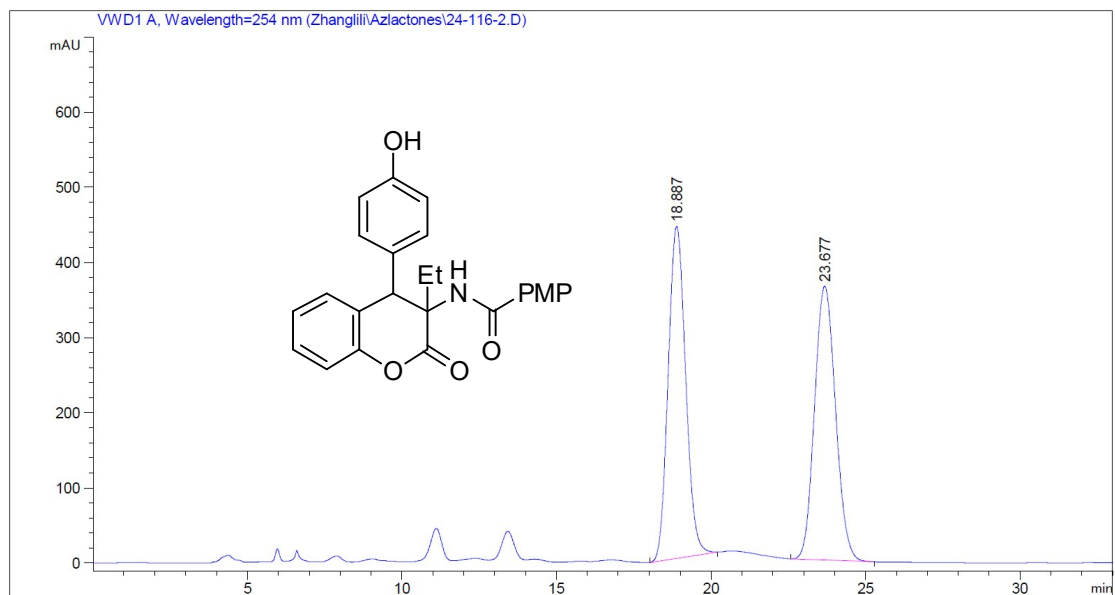

| # | Time   | Area    | Height | Width  | Symmetry | Area % |
|---|--------|---------|--------|--------|----------|--------|
| 1 | 18.887 | 17332.9 | 441.8  | 0.6167 | 0.893    | 50.206 |
| 2 | 23.677 | 17190.6 | 364.4  | 0.7384 | 0.888    | 49.794 |

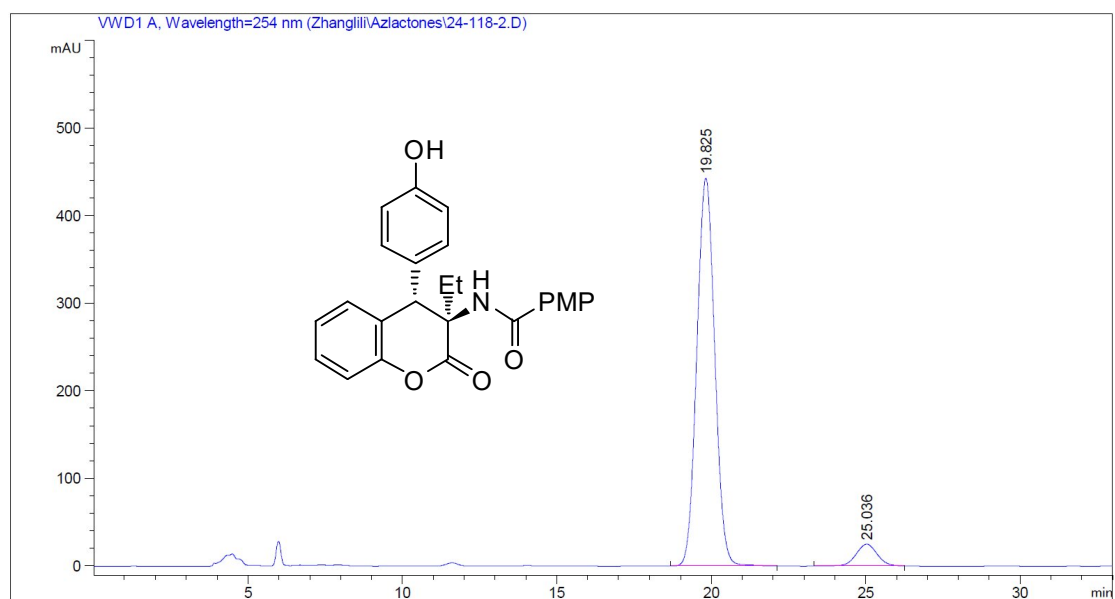

| # | Time   | Area   | Height | Width  | Symmetry | Area % |
|---|--------|--------|--------|--------|----------|--------|
| 1 | 19.825 | 17822  | 442.4  | 0.636  | 0.967    | 93.849 |
| 2 | 25.036 | 1168.1 | 24.7   | 0.7291 | 1.026    | 6.151  |



### E: Mechanistic study

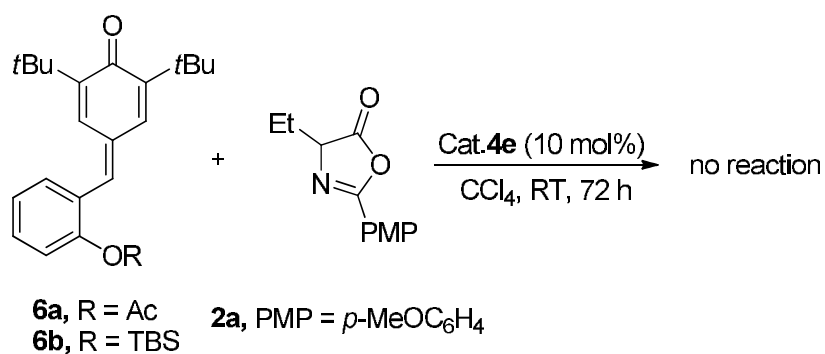

To a solution of CCl<sub>4</sub> (0.3 mL) were added Ac (or TBS)-protected quinone methides **6** (0.05 mmol), azlactone **2a** (0.075 mmol) and catalyst **4e** (0.005 mmol). The reaction mixture was stirred at room temperature for 72 h. The reaction was monitored by TLC analysis, which indicated that almost no reaction occurred.

## F: HPLC Analysis

### *N*-((3*R*,4*S*)-4-(3,5-di-*tert*-butyl-4-hydroxyphenyl)-3-ethyl-2-oxochroman-3-yl)-4-methoxybenzamide (3aa)

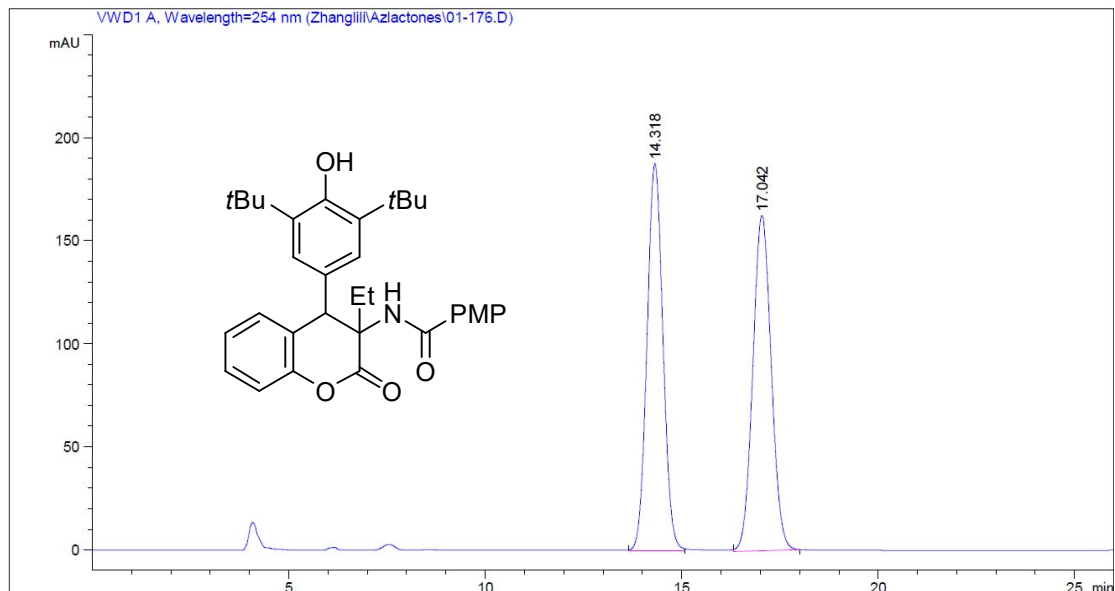

| # | Time   | Area   | Height | Width  | Symmetry | Area % |
|---|--------|--------|--------|--------|----------|--------|
| 1 | 14.318 | 5292.5 | 187.7  | 0.4699 | 0.942    | 49.970 |
| 2 | 17.042 | 5298.9 | 162.7  | 0.5429 | 0.941    | 50.030 |

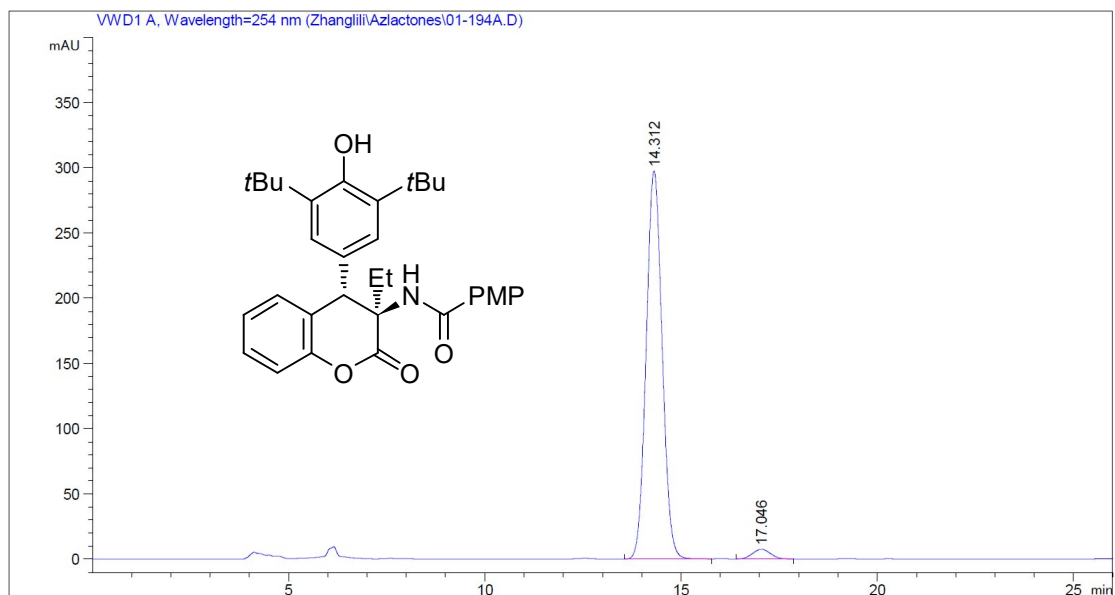

| # | Time   | Area   | Height | Width  | Symmetry | Area % |
|---|--------|--------|--------|--------|----------|--------|
| 1 | 14.312 | 8412.2 | 297.5  | 0.4713 | 0.93     | 97.135 |
| 2 | 17.046 | 248.1  | 7.6    | 0.5447 | 0.939    | 2.865  |



***N*-((3*R*,4*S*)-4-(3,5-di-*tert*-butyl-4-hydroxyphenyl)-3-ethyl-6-fluoro-2-oxochroman-3-yl)-4-methoxybenzamide (3ba)**

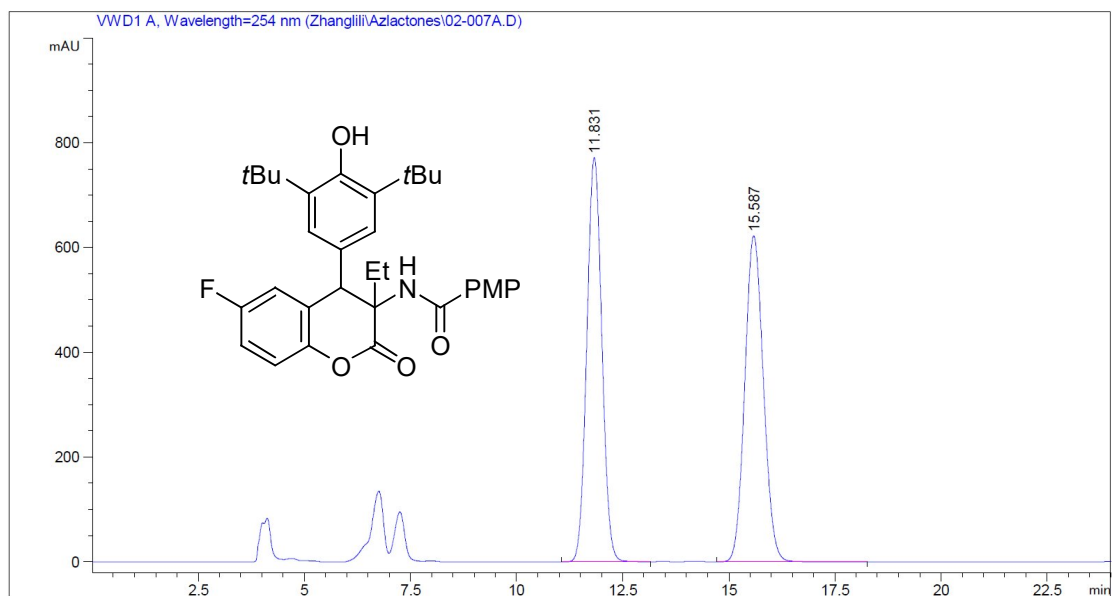

| # | Time   | Area    | Height | Width  | Symmetry | Area % |
|---|--------|---------|--------|--------|----------|--------|
| 1 | 11.831 | 18979   | 771.7  | 0.3849 | 0.939    | 49.980 |
| 2 | 15.587 | 18993.9 | 622.7  | 0.4769 | 0.882    | 50.020 |

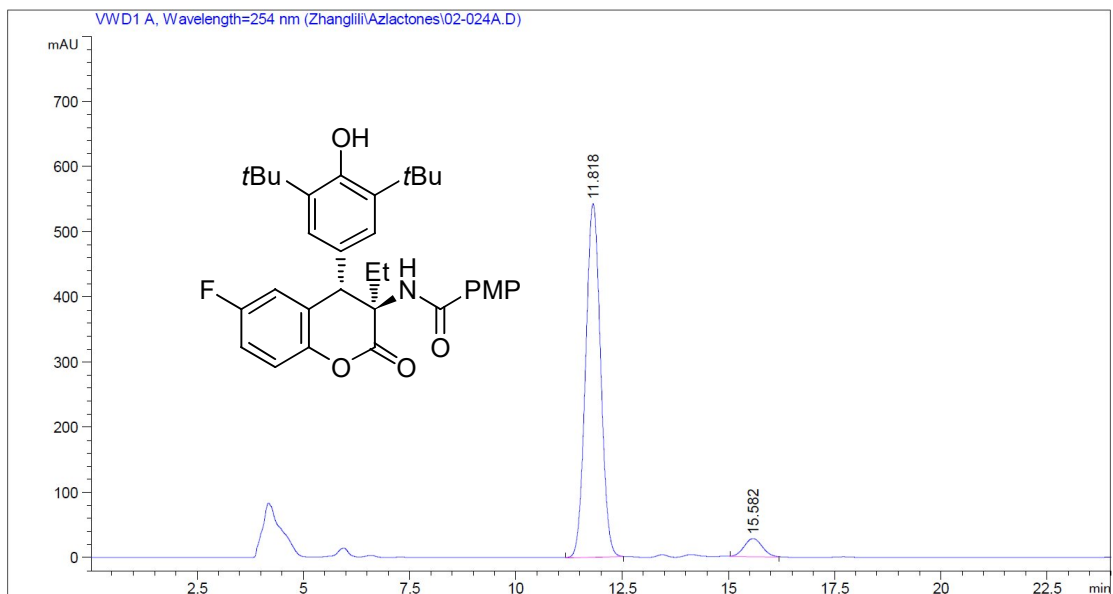

| # | Time   | Area    | Height | Width  | Symmetry | Area % |
|---|--------|---------|--------|--------|----------|--------|
| 1 | 11.818 | 13307.5 | 543.1  | 0.4084 | 0.965    | 94.109 |
| 2 | 15.582 | 833     | 28     | 0.4953 | 0.941    | 5.891  |

***N*-((3*R*,4*S*)-6-chloro-4-(3,5-di-*tert*-butyl-4-hydroxyphenyl)-3-ethyl-2-oxochroman-3-yl)-4-methoxybenzamide (3ca)**

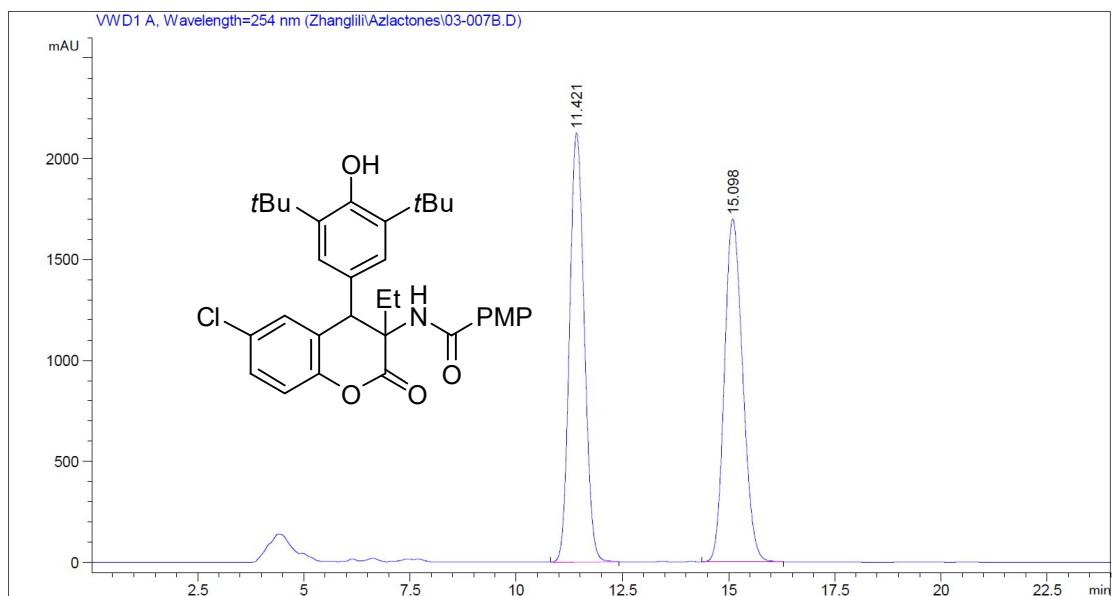

| # | Time   | Area    | Height | Width  | Symmetry | Area % |
|---|--------|---------|--------|--------|----------|--------|
| 1 | 11.421 | 51177.9 | 2128.6 | 0.4007 | 0.874    | 50.028 |
| 2 | 15.098 | 51121   | 1699.9 | 0.5012 | 0.805    | 49.972 |

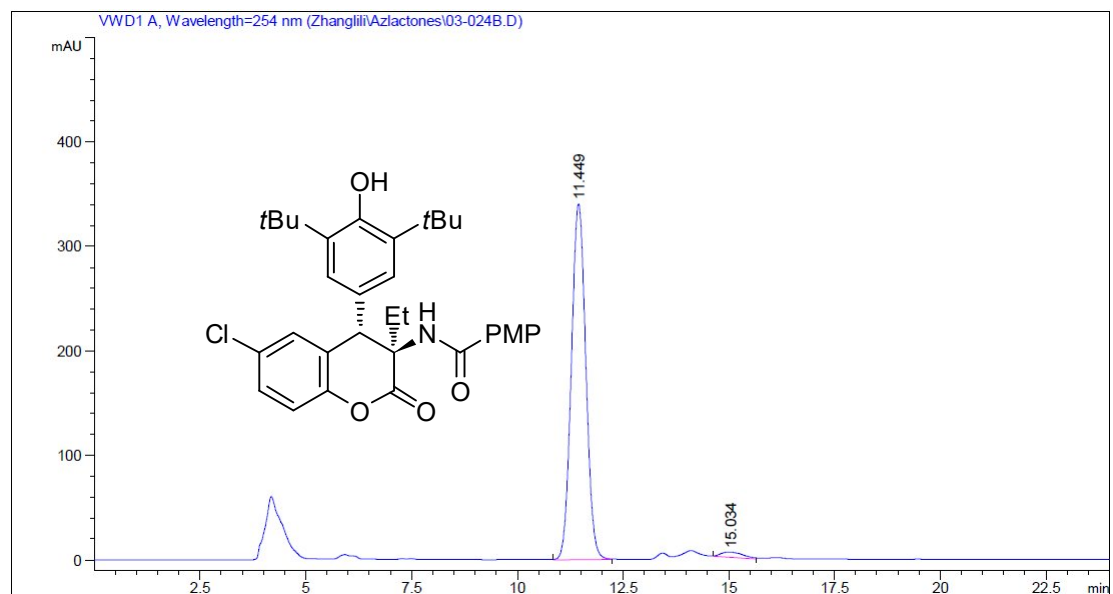

| # | Time   | Area   | Height | Width  | Symmetry | Area % |
|---|--------|--------|--------|--------|----------|--------|
| 1 | 11.449 | 8089.6 | 340.6  | 0.3958 | 0.959    | 97.829 |
| 2 | 15.034 | 179.5  | 4.9    | 0.6077 | 0.467    | 2.171  |

***N*-((3*R*,4*S*)-6-bromo-4-(3,5-di-*tert*-butyl-4-hydroxyphenyl)-3-ethyl-2-oxochroman-3-yl)-4-methoxybenzamide (3da)**

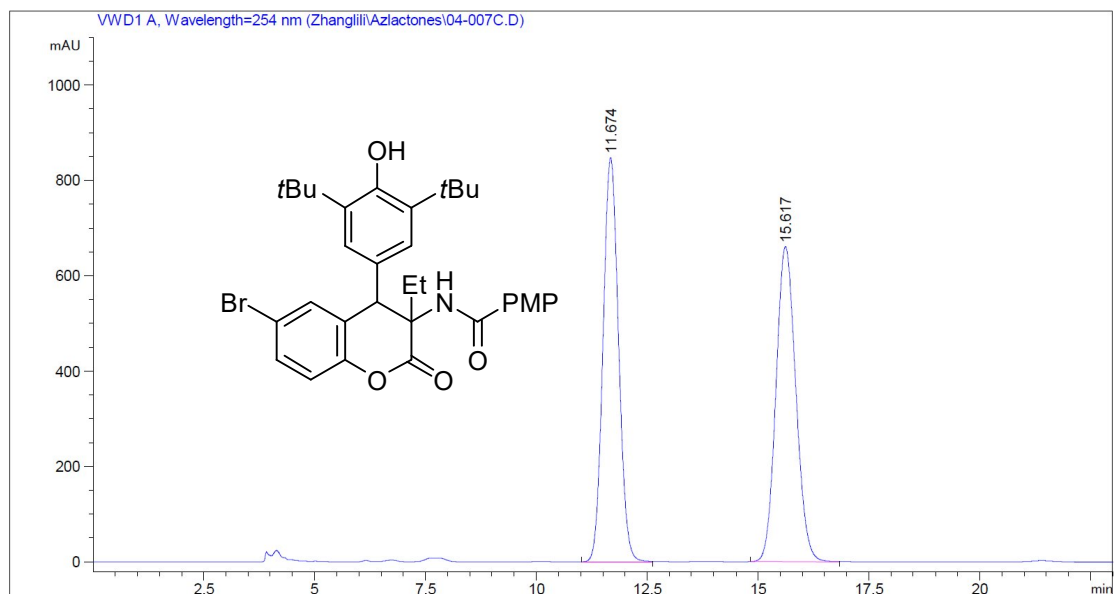

| # | Time   | Area  | Height | Width  | Symmetry | Area % |
|---|--------|-------|--------|--------|----------|--------|
| 1 | 11.674 | 20595 | 847.9  | 0.4048 | 0.916    | 50.035 |
| 2 | 15.617 | 20566 | 660.9  | 0.5186 | 0.879    | 49.965 |

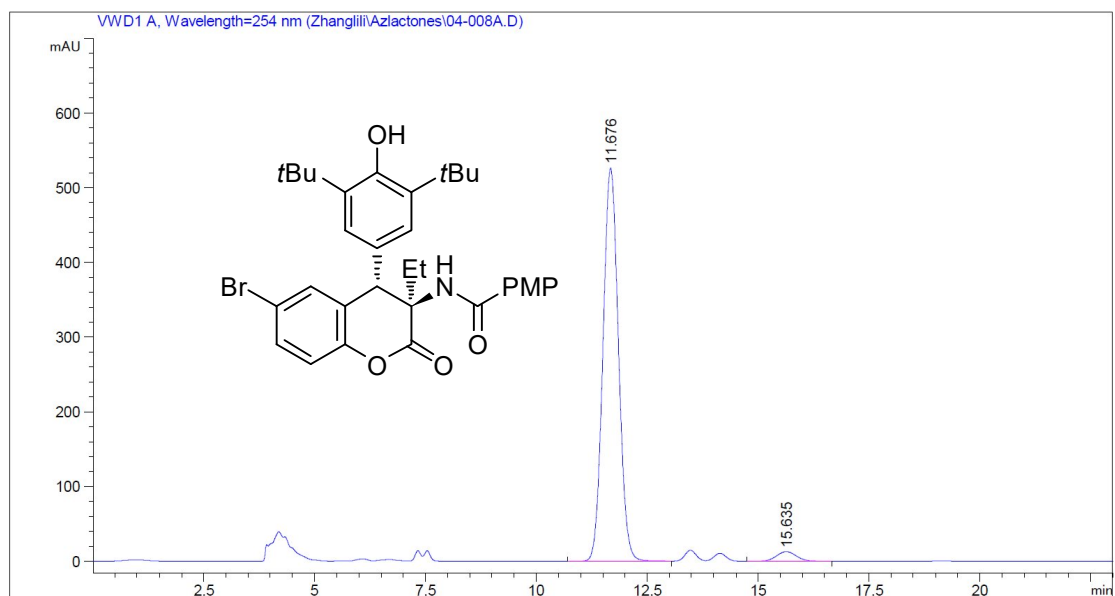

| # | Time   | Area    | Height | Width  | Symmetry | Area % |
|---|--------|---------|--------|--------|----------|--------|
| 1 | 11.676 | 12760.4 | 526.1  | 0.3789 | 0.929    | 96.918 |
| 2 | 15.635 | 405.8   | 13     | 0.484  | 0.923    | 3.082  |

***N*-((3*R*,4*S*)-4-(3,5-di-*tert*-butyl-4-hydroxyphenyl)-3-ethyl-6-methyl-2-oxochroman-3-yl)-4-methoxybenzamide (3ea)**

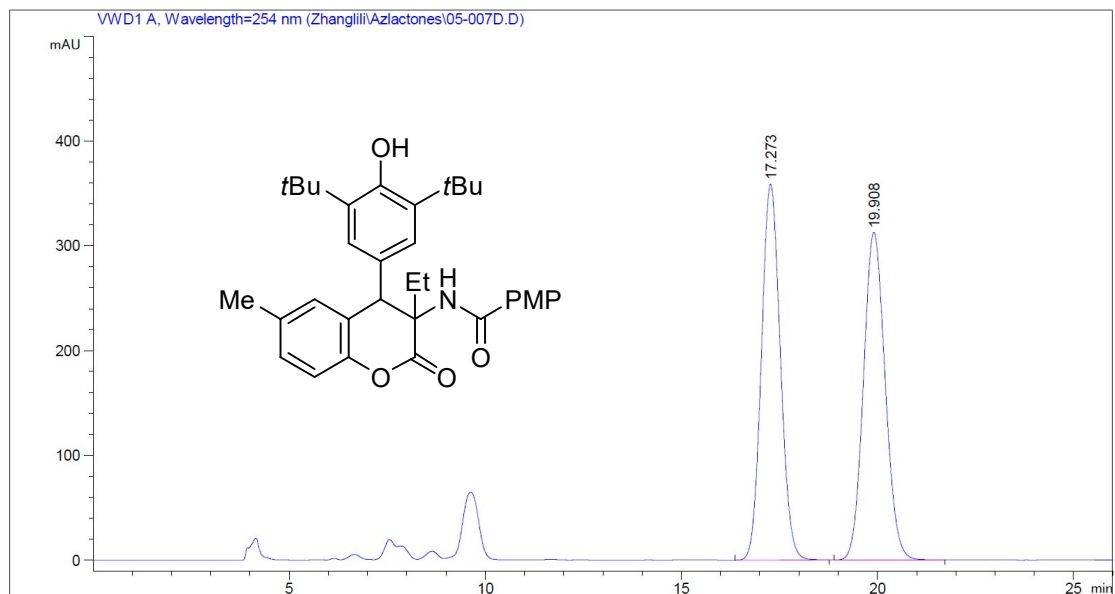

| # | Time   | Area    | Height | Width  | Symmetry | Area % |
|---|--------|---------|--------|--------|----------|--------|
| 1 | 17.273 | 12004   | 358.9  | 0.5575 | 0.897    | 49.939 |
| 2 | 19.908 | 12033.3 | 312.8  | 0.6411 | 0.89     | 50.061 |

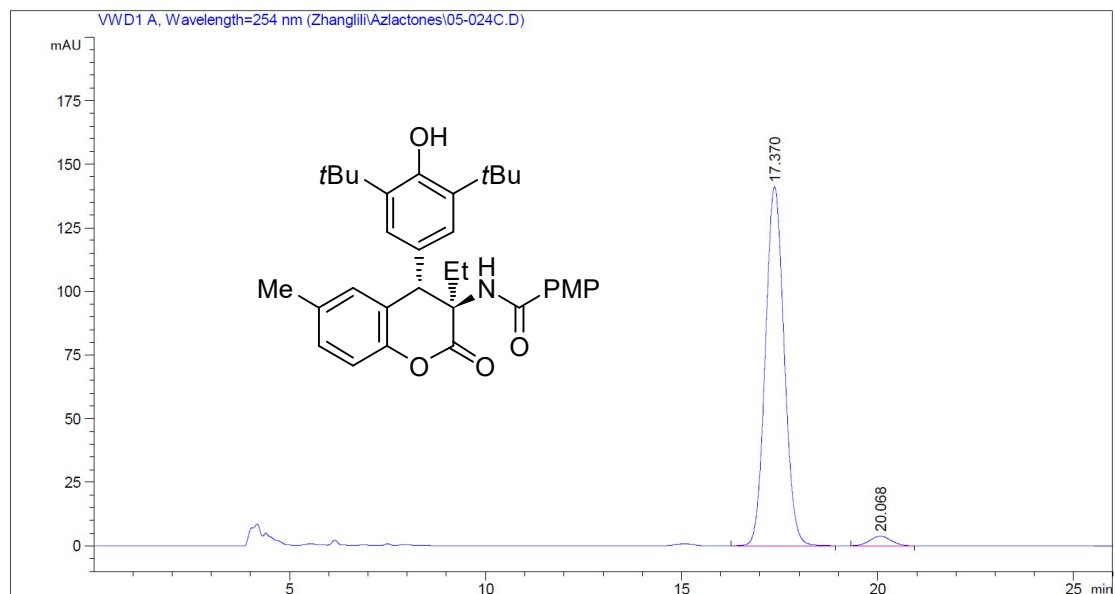

| # | Time   | Area   | Height | Width  | Symmetry | Area % |
|---|--------|--------|--------|--------|----------|--------|
| 1 | 17.37  | 4680.5 | 141.1  | 0.553  | 0.915    | 97.127 |
| 2 | 20.068 | 138.4  | 3.7    | 0.6215 | 0.926    | 2.873  |

***N*-((3*R*,4*S*)-4-(3,5-di-*tert*-butyl-4-hydroxyphenyl)-3-ethyl-7-methoxy-2-oxochroman-3-yl)-4-methoxybenzamide (3fa)**

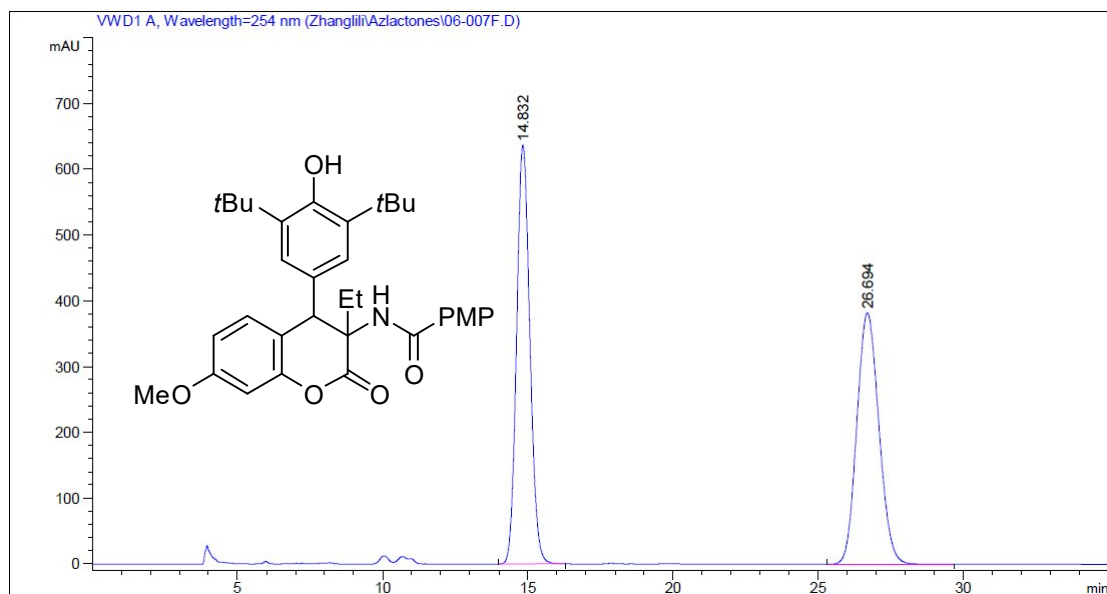

| # | Time   | Area    | Height | Width  | Symmetry | Area % |
|---|--------|---------|--------|--------|----------|--------|
| 1 | 14.832 | 20188.6 | 637.4  | 0.4915 | 0.865    | 50.043 |
| 2 | 26.694 | 20153.6 | 382.2  | 0.8341 | 0.87     | 49.957 |

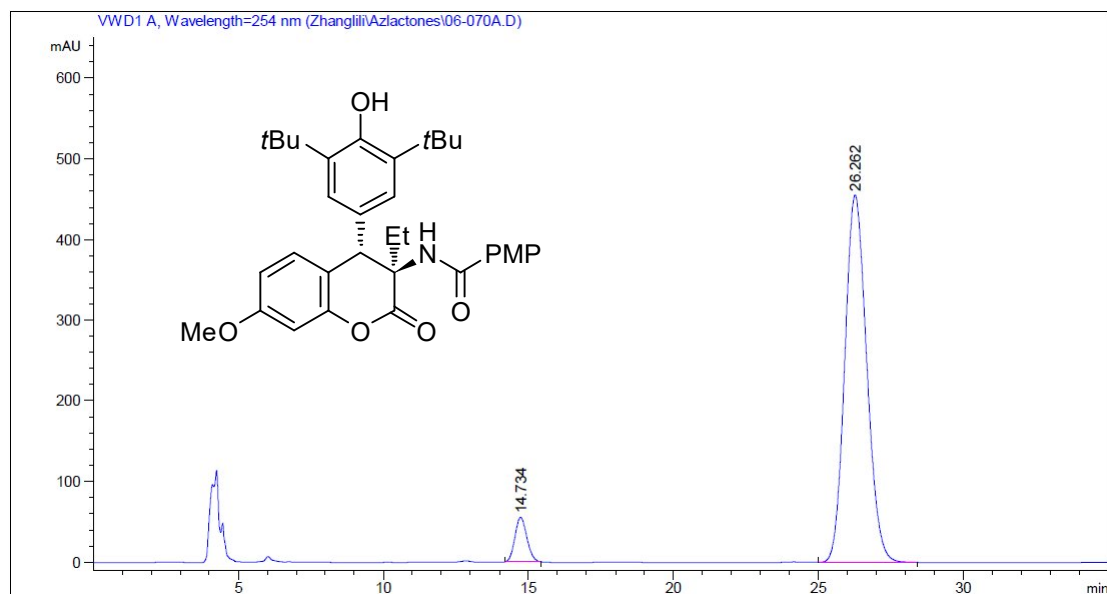

| # | Time   | Area    | Height | Width  | Symmetry | Area % |
|---|--------|---------|--------|--------|----------|--------|
| 1 | 14.734 | 1583.8  | 55.2   | 0.4786 | 0.878    | 6.198  |
| 2 | 26.262 | 23967.9 | 455.9  | 0.8763 | 0.849    | 93.802 |

***N*-((1*S*,2*R*)-1-(3,5-di-*tert*-butyl-4-hydroxyphenyl)-2-ethyl-3-oxo-2,3-dihydro-1*H*-benzo[*f*]chromen-2-yl)-4-methoxybenzamide (3ga)**

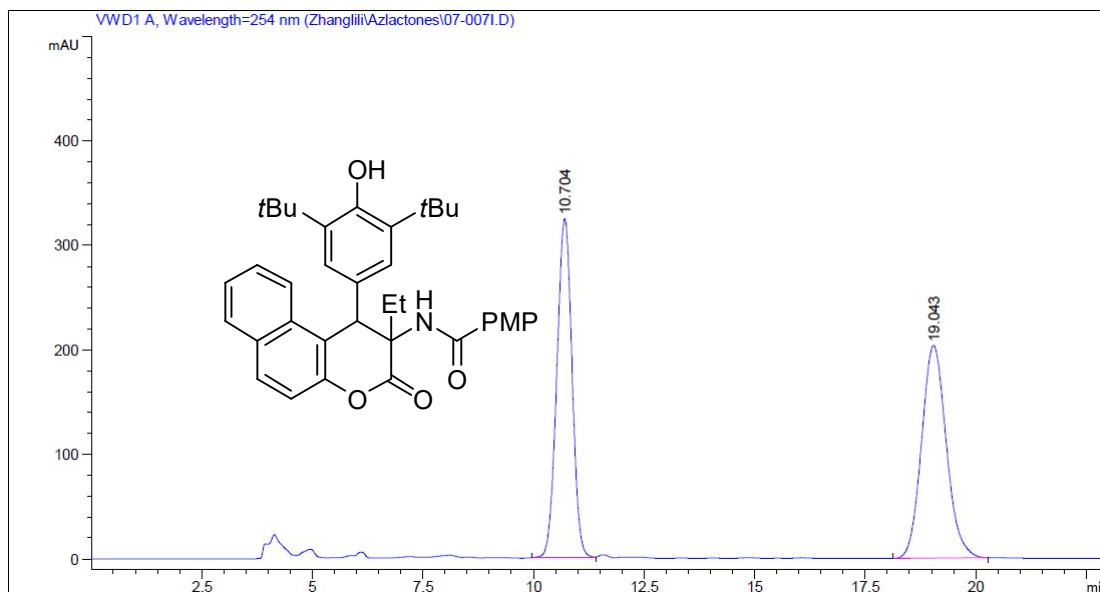

| # | Time   | Area   | Height | Width  | Symmetry | Area % |
|---|--------|--------|--------|--------|----------|--------|
| 1 | 10.704 | 7763.2 | 324.6  | 0.3986 | 1.053    | 49.525 |
| 2 | 19.043 | 7912.2 | 203.6  | 0.6476 | 0.9      | 50.475 |

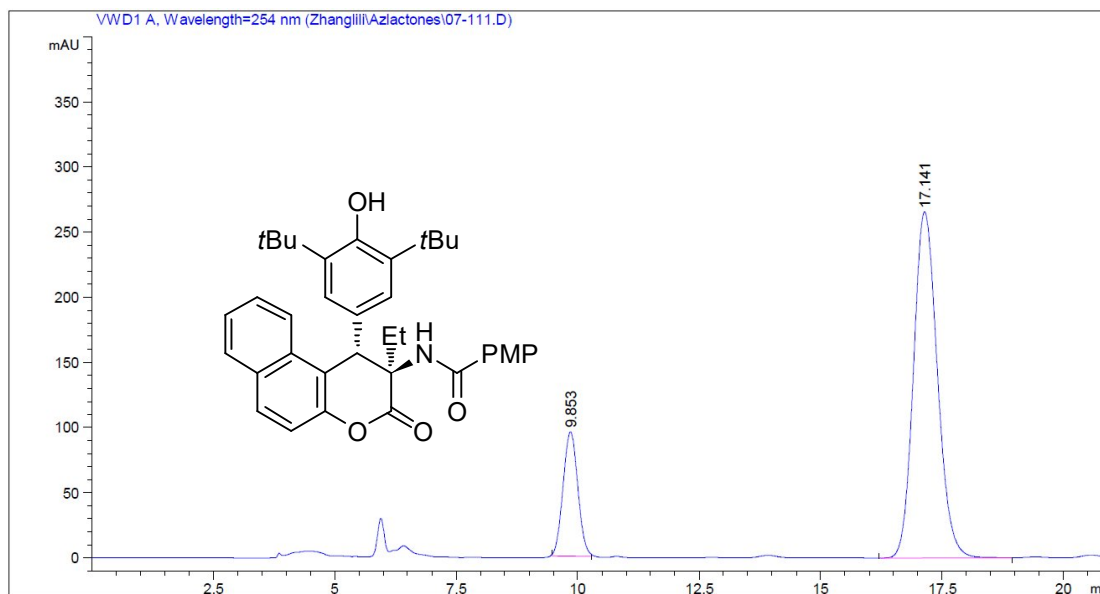

| # | Time   | Area   | Height | Width  | Symmetry | Area % |
|---|--------|--------|--------|--------|----------|--------|
| 1 | 9.853  | 2008.9 | 95.2   | 0.3516 | 0.98     | 18.138 |
| 2 | 17.141 | 9066.6 | 265.5  | 0.5283 | 0.821    | 81.862 |

***N*-((3*R*,4*S*)-4-(3,5-di-*tert*-butyl-4-hydroxyphenyl)-2-oxo-3-propylchroman-3-yl)-4-methoxybenzamide (3ab)**

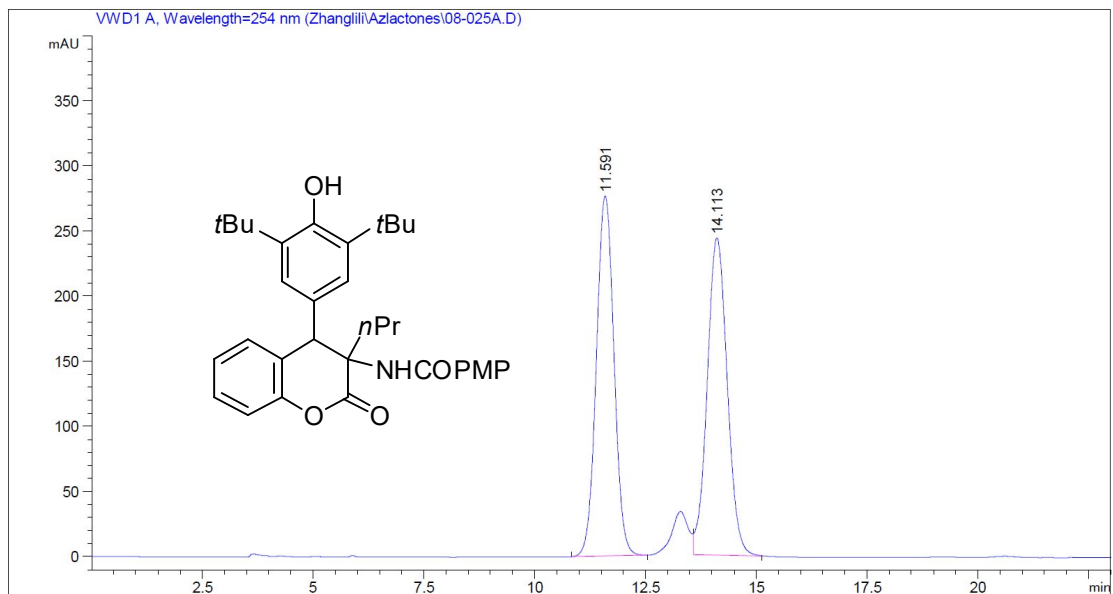

| # | Time   | Area   | Height | Width  | Symmetry | Area % |
|---|--------|--------|--------|--------|----------|--------|
| 1 | 11.591 | 7647.6 | 276.5  | 0.4609 | 0.968    | 49.962 |
| 2 | 14.113 | 7659.2 | 243.6  | 0.524  | 0.913    | 50.038 |

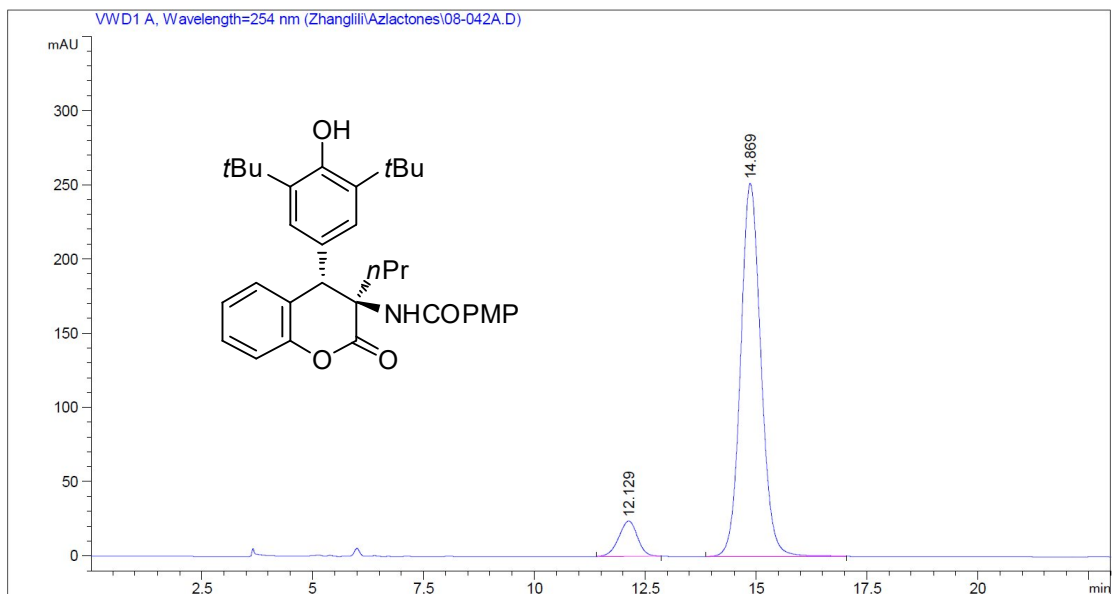

| # | Time   | Area   | Height | Width  | Symmetry | Area % |
|---|--------|--------|--------|--------|----------|--------|
| 1 | 12.129 | 696.5  | 23.8   | 0.4887 | 1.11     | 8.007  |
| 2 | 14.869 | 8001.8 | 251.4  | 0.5305 | 0        | 91.993 |

***N*-((3*R*,4*S*)-4-(3,5-di-*tert*-butyl-4-hydroxyphenyl)-3-isopropyl-2-oxochroman-3-yl)-4-methoxybenzamide (3ac)**

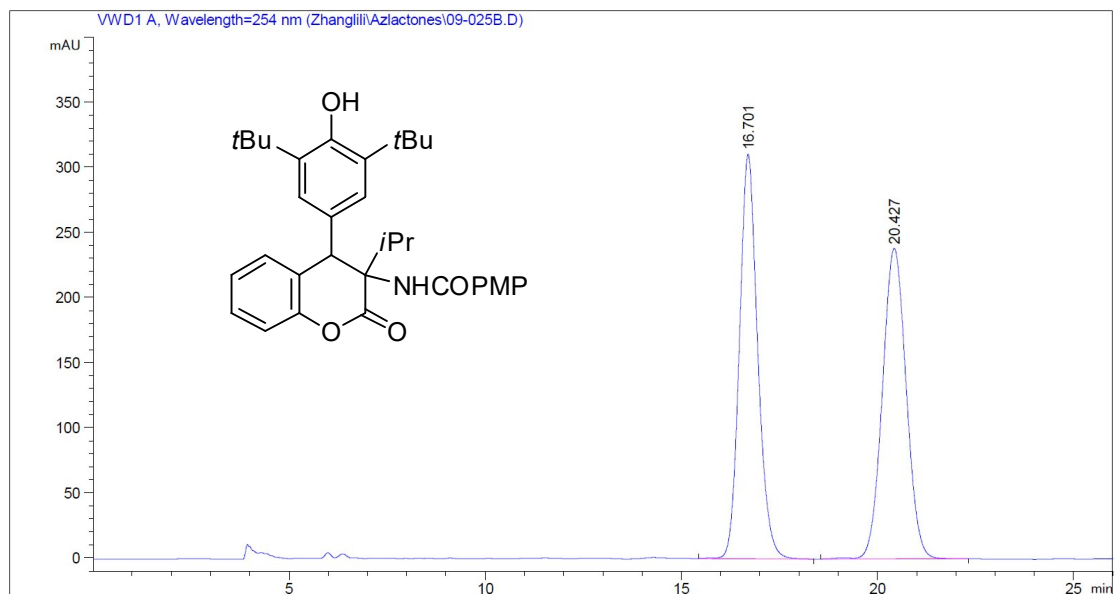

| # | Time   | Area    | Height | Width  | Symmetry | Area % |
|---|--------|---------|--------|--------|----------|--------|
| 1 | 16.701 | 10043.2 | 310.6  | 0.5389 | 0.863    | 49.952 |
| 2 | 20.427 | 10062.4 | 238.5  | 0.7031 | 0.963    | 50.048 |

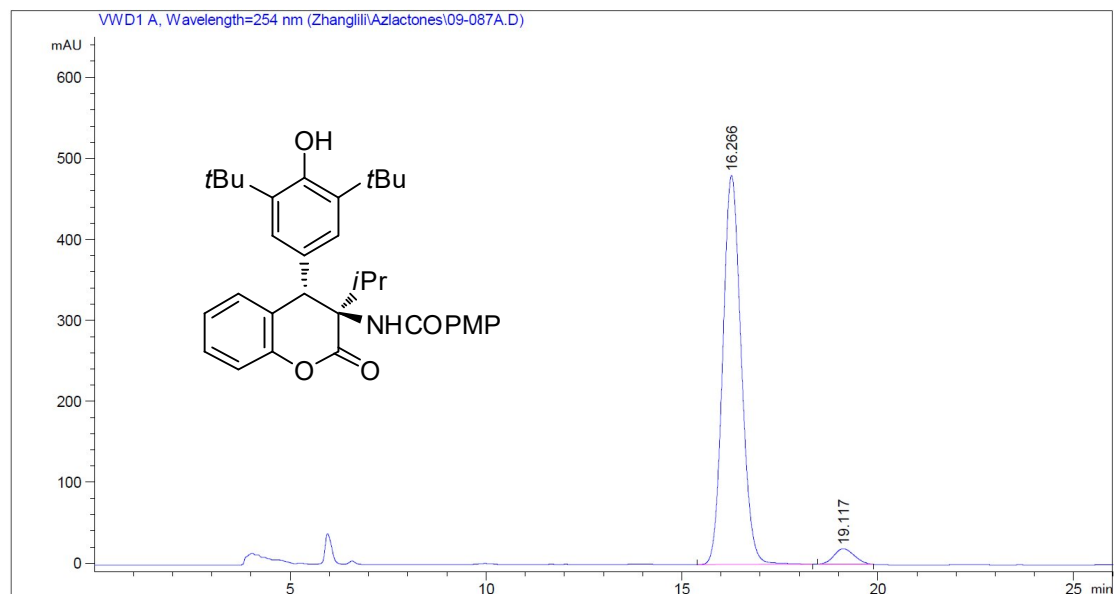

| # | Time   | Area    | Height | Width  | Symmetry | Area % |
|---|--------|---------|--------|--------|----------|--------|
| 1 | 16.266 | 15701.8 | 480.7  | 0.5445 | 0.857    | 95.792 |
| 2 | 19.117 | 689.8   | 19.1   | 0.601  | 0.817    | 4.208  |



***N*-((3*R*,4*S*)-4-(3,5-di-*tert*-butyl-4-hydroxyphenyl)-3-isobutyl-2-oxochroman-3-yl)-4-methoxybenzamide (3ad)**

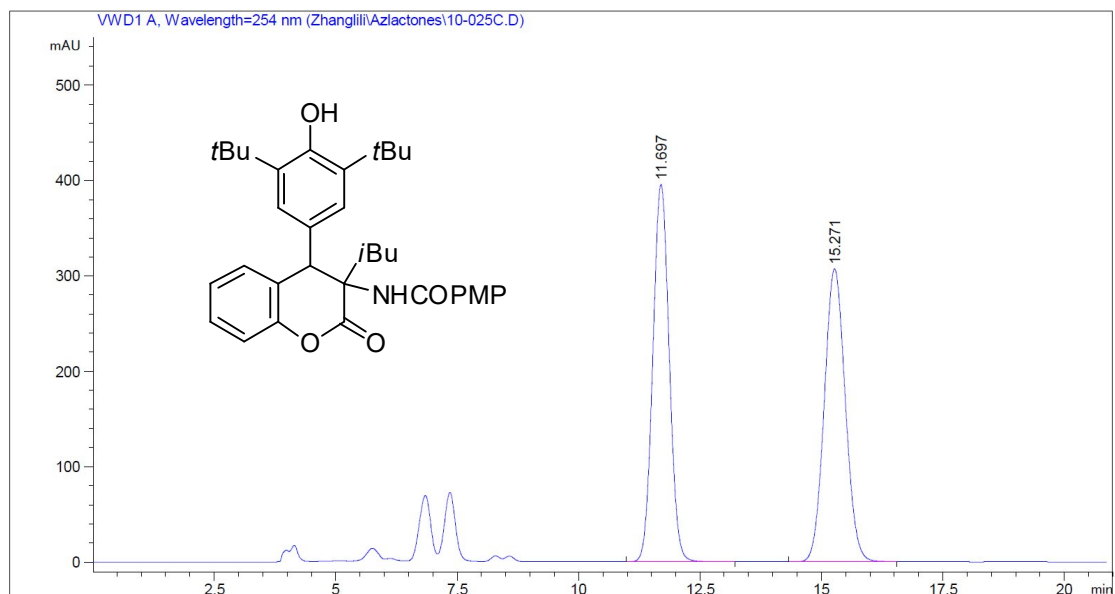

| # | Time   | Area   | Height | Width  | Symmetry | Area % |
|---|--------|--------|--------|--------|----------|--------|
| 1 | 11.697 | 9261.3 | 395.4  | 0.3663 | 0.948    | 50.060 |
| 2 | 15.271 | 9239.2 | 307    | 0.4692 | 0.918    | 49.940 |

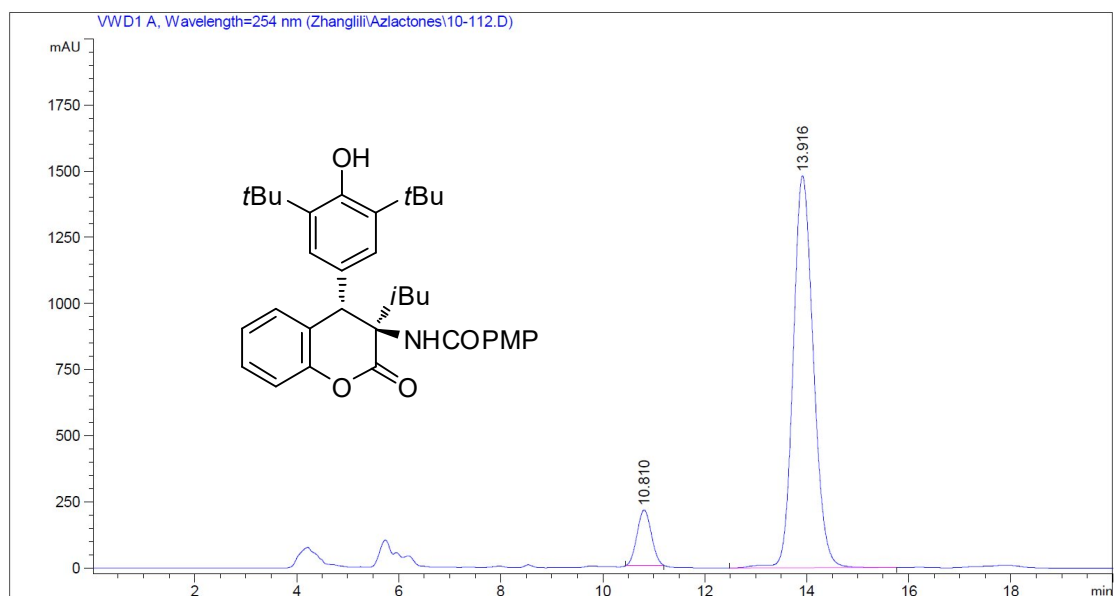

| # | Time   | Area    | Height | Width  | Symmetry | Area % |
|---|--------|---------|--------|--------|----------|--------|
| 1 | 10.81  | 4127.1  | 210.8  | 0.3263 | 0.951    | 9.194  |
| 2 | 13.916 | 40759.7 | 1481.4 | 0.4239 | 0.841    | 90.806 |

***N*-((3*S*,4*S*)-4-(3,5-di-*tert*-butyl-4-hydroxyphenyl)-2-oxo-3-phenylchroman-3-yl)-4-methoxybenzamide (**3ae**)**

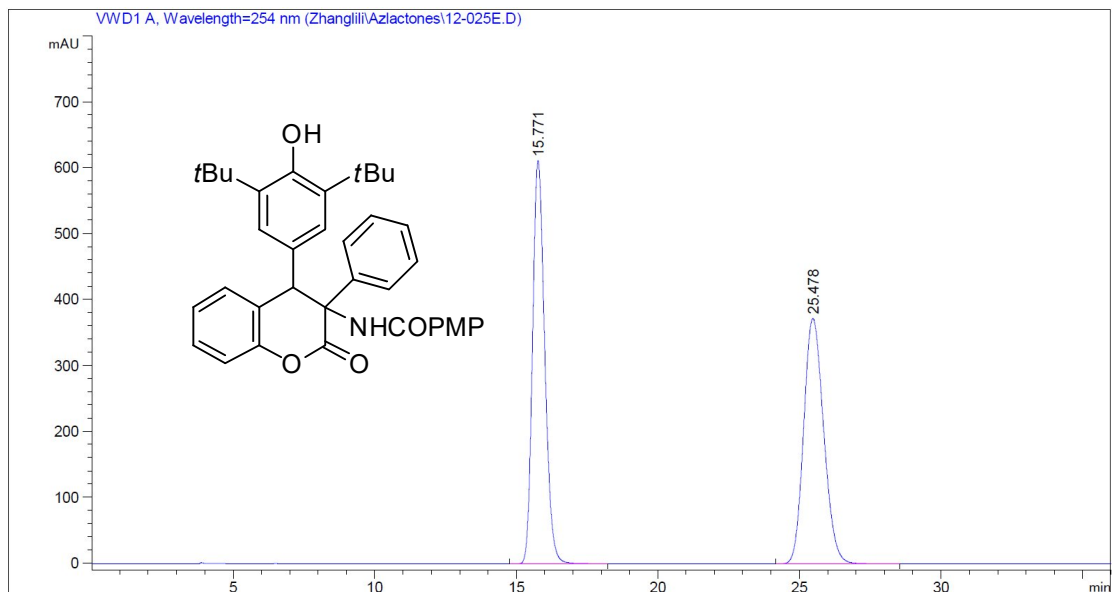

| # | Time   | Area    | Height | Width  | Symmetry | Area % |
|---|--------|---------|--------|--------|----------|--------|
| 1 | 15.771 | 18285.6 | 611.8  | 0.4607 | 0.777    | 49.999 |
| 2 | 25.478 | 18286.6 | 372.2  | 0.7592 | 0.813    | 50.001 |

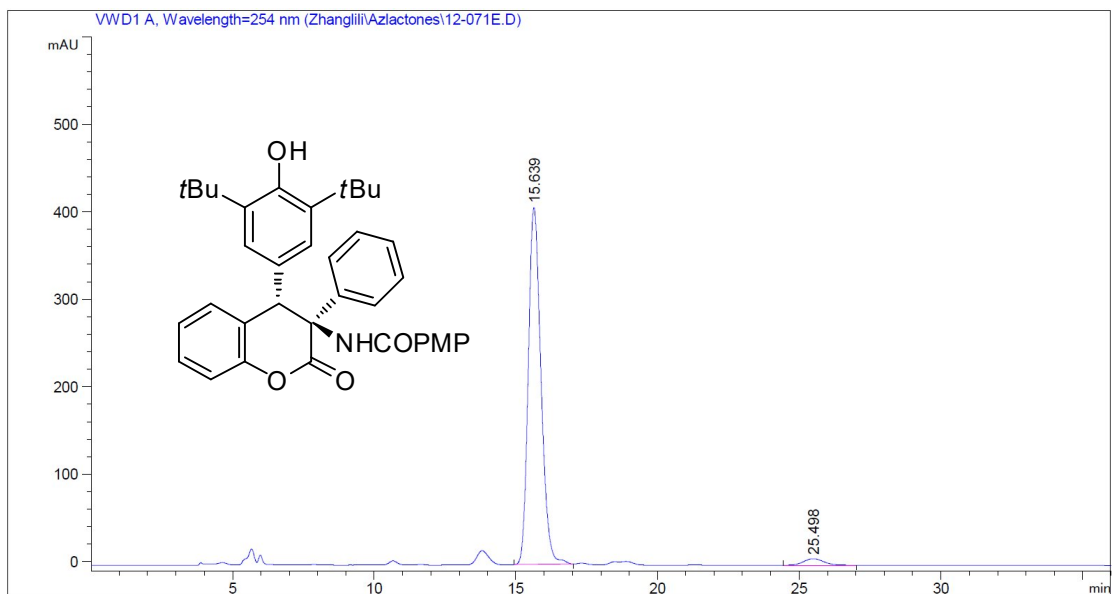

| # | Time   | Area    | Height | Width  | Symmetry | Area % |
|---|--------|---------|--------|--------|----------|--------|
| 1 | 15.639 | 12677.8 | 407.9  | 0.5181 | 0.772    | 97.155 |
| 2 | 25.498 | 371.2   | 7.5    | 0.8284 | 0.879    | 2.845  |

***N*-((3*R*,4*S*)-3-benzyl-4-(3,5-di-*tert*-butyl-4-hydroxyphenyl)-2-oxochroman-3-yl)-4-methoxybenzamide (3af)**

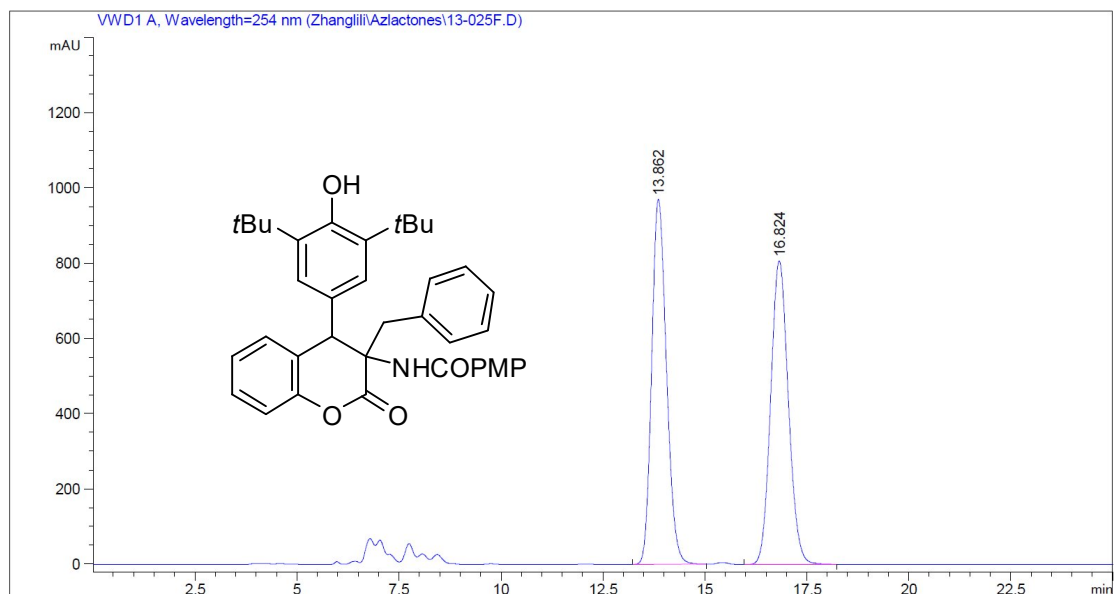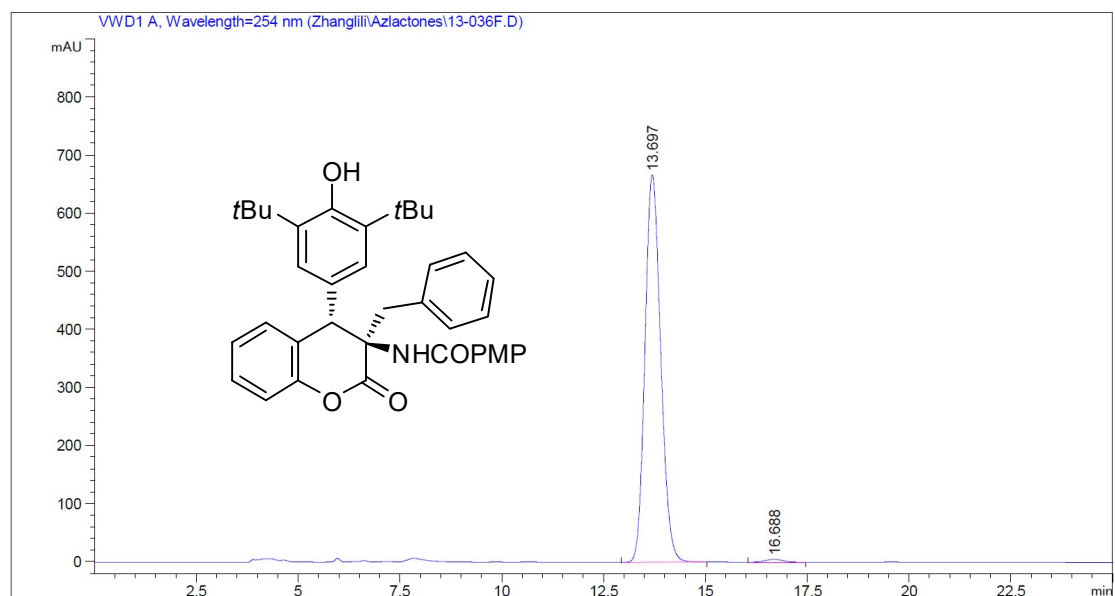

***N*-((3*R*,4*S*)-4-(3,5-di-*tert*-butyl-4-hydroxyphenyl)-3-(2-(methylthio)ethyl)-2-oxochroman-3-yl)-4-methoxybenzamide (3ag)**

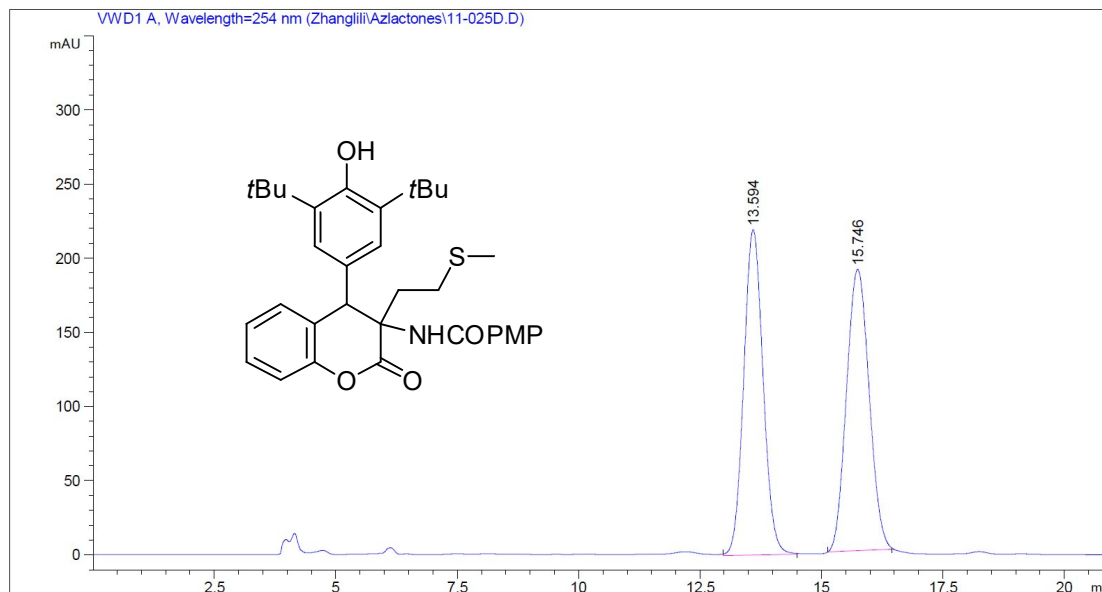

| # | Time   | Area   | Height | Width  | Symmetry | Area % |
|---|--------|--------|--------|--------|----------|--------|
| 1 | 13.594 | 6082.4 | 219.6  | 0.4617 | 0.909    | 49.797 |
| 2 | 15.746 | 6132.1 | 189.6  | 0.5389 | 0.938    | 50.203 |

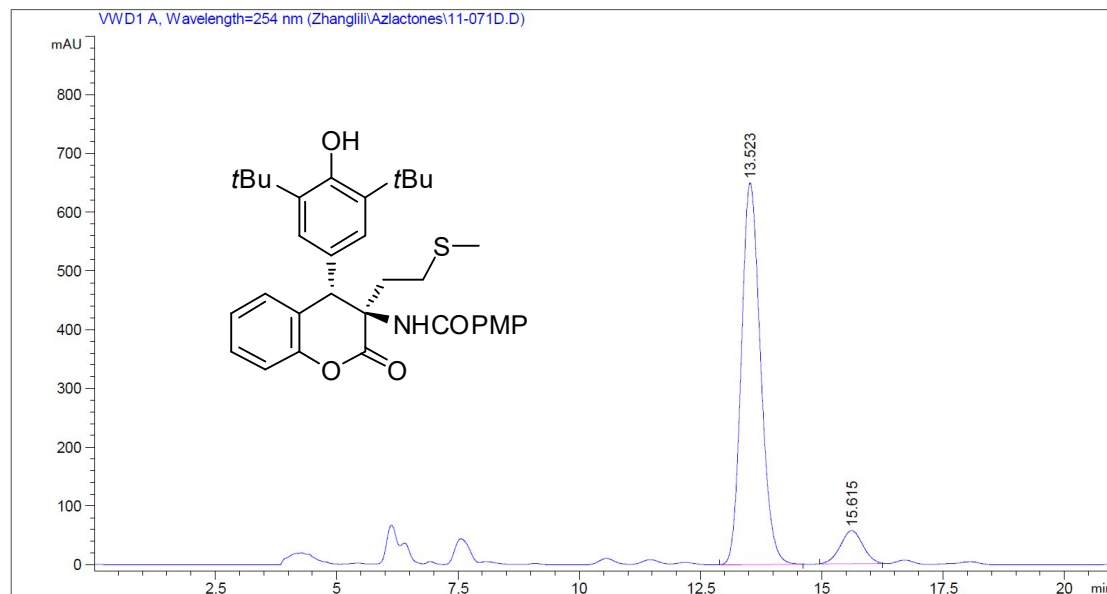

| # | Time   | Area    | Height | Width  | Symmetry | Area % |
|---|--------|---------|--------|--------|----------|--------|
| 1 | 13.523 | 17878.1 | 649.9  | 0.4585 | 0.807    | 90.835 |
| 2 | 15.615 | 1803.9  | 56.2   | 0.5346 | 0.989    | 9.165  |

***N*-((3*R*,4*S*)-4-(3,5-di-*tert*-butyl-4-hydroxyphenyl)-3-ethyl-2-oxochroman-3-yl)-4-fluorobenzamide (3ah)**

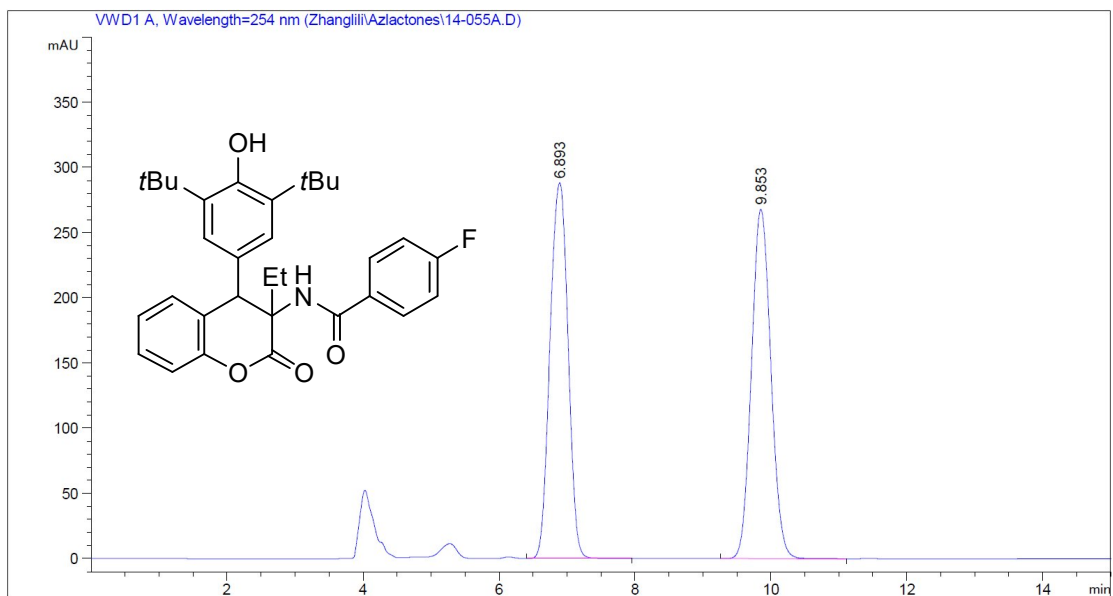

| # | Time  | Area   | Height | Width  | Symmetry | Area % |
|---|-------|--------|--------|--------|----------|--------|
| 1 | 6.893 | 5304.2 | 288.1  | 0.2988 | 1.076    | 50.004 |
| 2 | 9.853 | 5303.4 | 267.9  | 0.3099 | 0.903    | 49.996 |

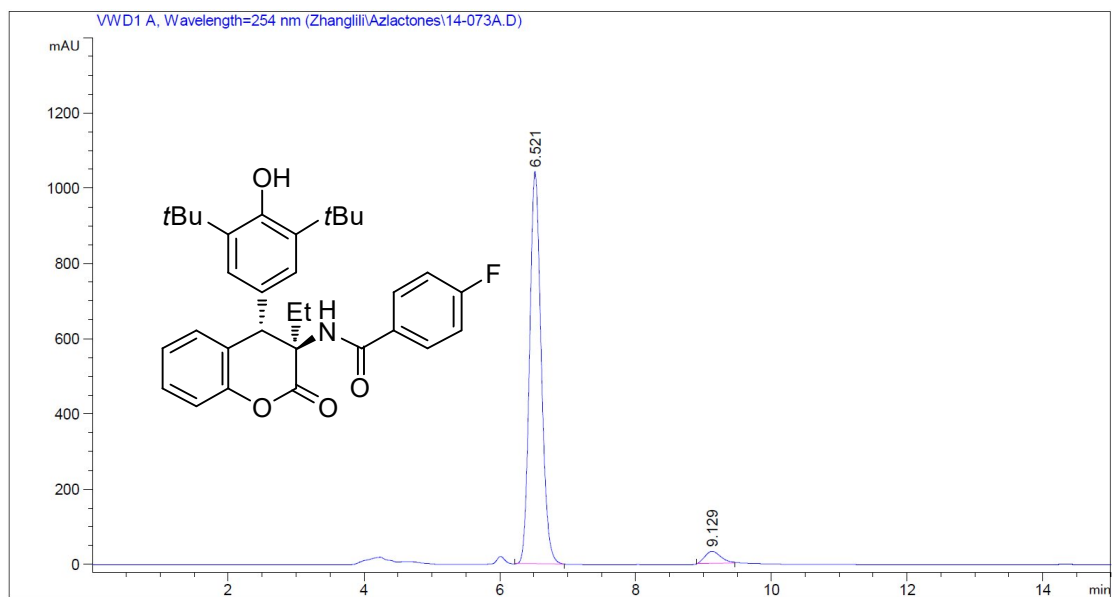

| # | Time  | Area    | Height | Width  | Symmetry | Area % |
|---|-------|---------|--------|--------|----------|--------|
| 1 | 6.521 | 12358.7 | 1043.1 | 0.1975 | 0.851    | 96.013 |
| 2 | 9.129 | 513.2   | 32     | 0.2675 | 0.793    | 3.987  |

**4-Chloro-*N*-((3*R*,4*S*)-4-(3,5-di-*tert*-butyl-4-hydroxyphenyl)-3-ethyl-2-oxochroman-3-yl)benzamide (3ai)**

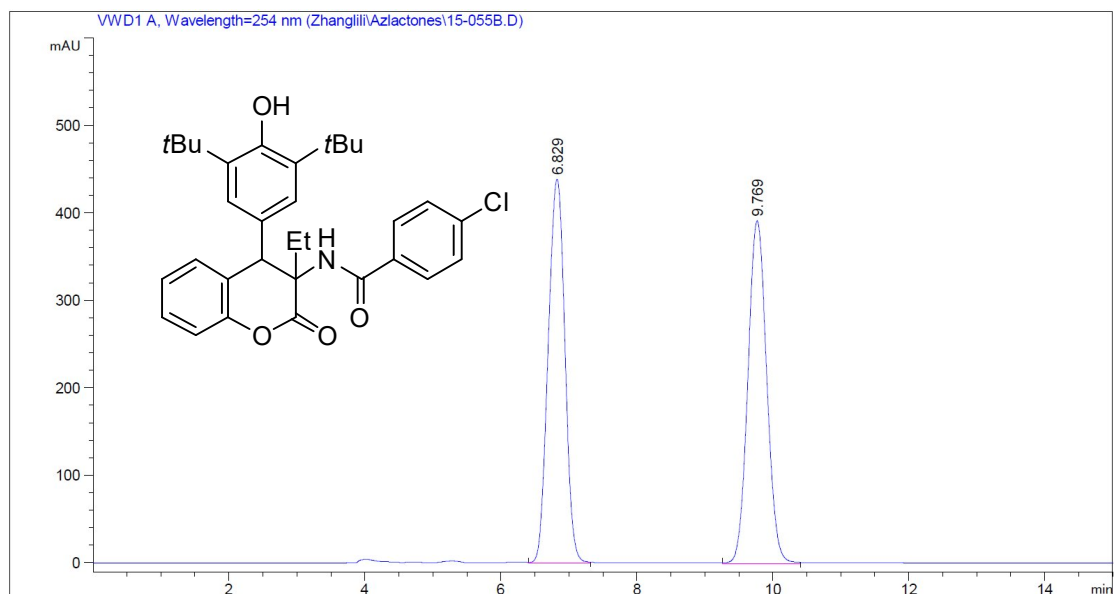

| # | Time  | Area   | Height | Width  | Symmetry | Area % |
|---|-------|--------|--------|--------|----------|--------|
| 1 | 6.829 | 7477.7 | 438.5  | 0.2842 | 1.099    | 49.903 |
| 2 | 9.769 | 7506.8 | 391.4  | 0.3196 | 0.93     | 50.097 |

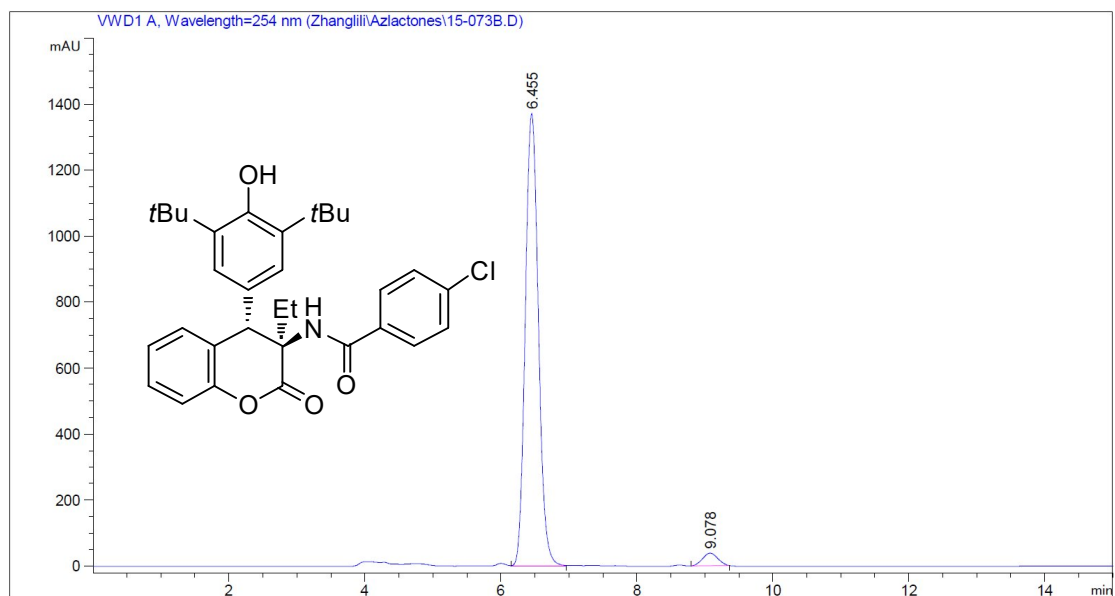

| # | Time  | Area    | Height | Width | Symmetry | Area % |
|---|-------|---------|--------|-------|----------|--------|
| 1 | 6.455 | 18270.1 | 1371.6 | 0.222 | 0.914    | 96.884 |
| 2 | 9.078 | 587.5   | 38     | 0.258 | 0.956    | 3.116  |

***N*-(3*R*,4*S*)-4-(3,5-di-*tert*-butyl-4-hydroxyphenyl)-3-ethyl-2-oxochroman-3-yl)-4-methylbenzamide (3aj)**

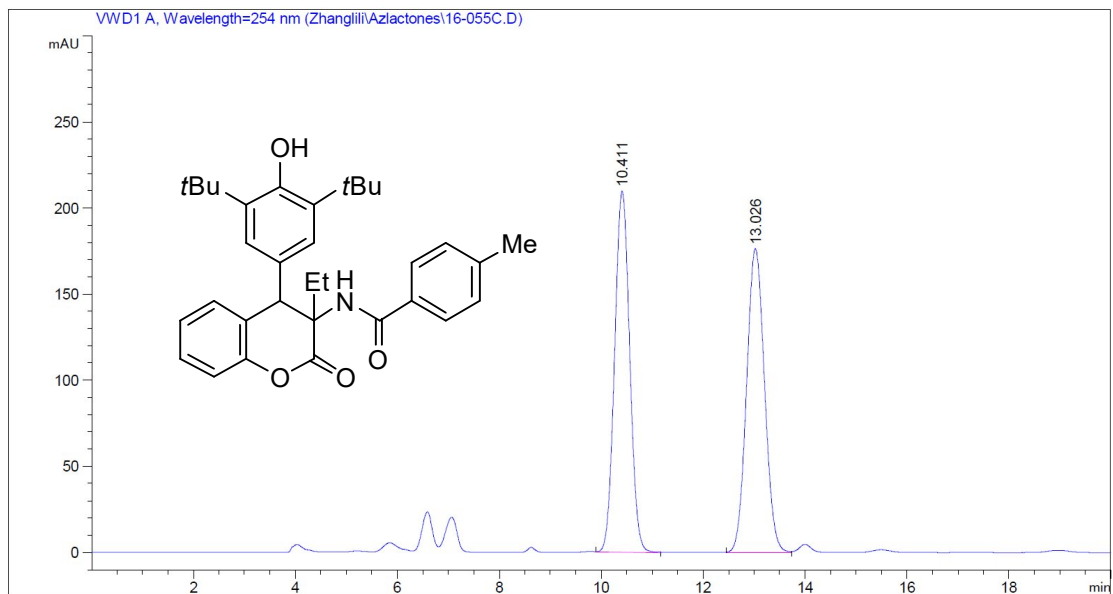

| # | Time   | Area   | Height | Width  | Symmetry | Area % |
|---|--------|--------|--------|--------|----------|--------|
| 1 | 10.411 | 4310.1 | 209.6  | 0.3426 | 0.959    | 49.825 |
| 2 | 13.026 | 4340.4 | 176.7  | 0.4093 | 0.928    | 50.175 |

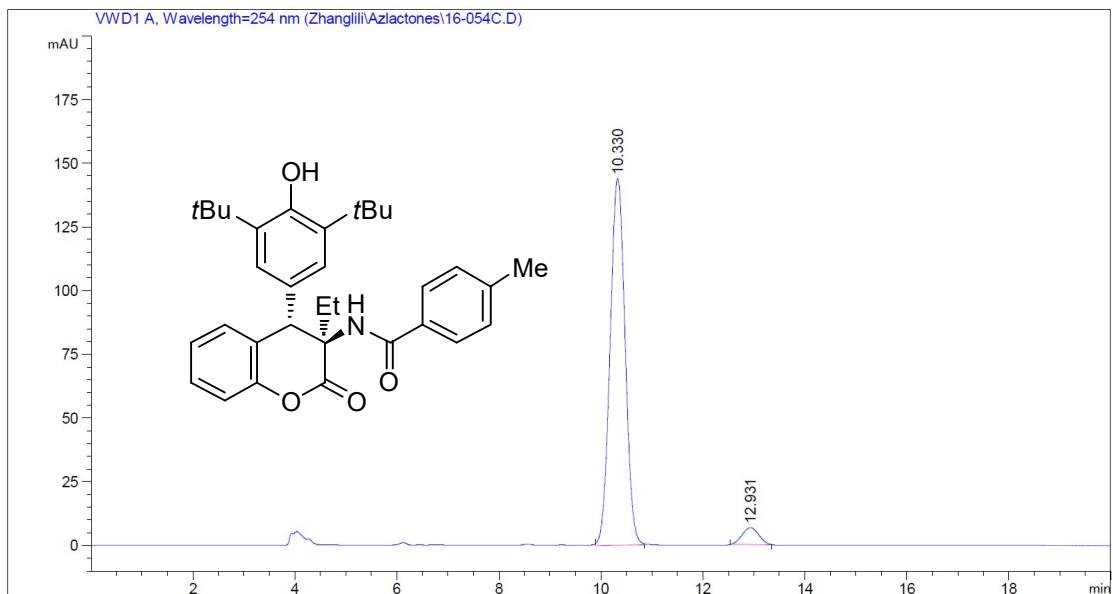

| # | Time   | Area  | Height | Width  | Symmetry | Area % |
|---|--------|-------|--------|--------|----------|--------|
| 1 | 10.33  | 2941  | 144    | 0.3404 | 0.988    | 95.017 |
| 2 | 12.931 | 154.2 | 6.7    | 0.384  | 0.953    | 4.983  |

**3-Chloro-*N*-((3*R*,4*S*)-4-(3,5-di-*tert*-butyl-4-hydroxyphenyl)-3-ethyl-2-oxochroman-3-yl)benzamide (3ak)**

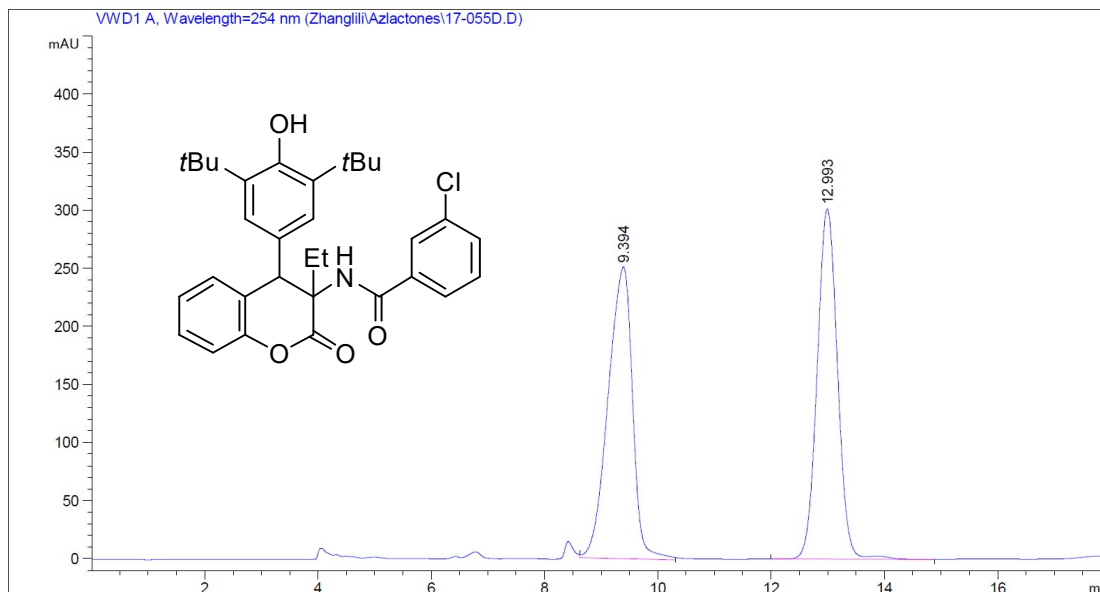

| # | Time   | Area   | Height | Width  | Symmetry | Area % |
|---|--------|--------|--------|--------|----------|--------|
| 1 | 9.394  | 7526.2 | 251.1  | 0.4996 | 1.573    | 49.989 |
| 2 | 12.993 | 7529.6 | 301.4  | 0.3862 | 0.961    | 50.011 |

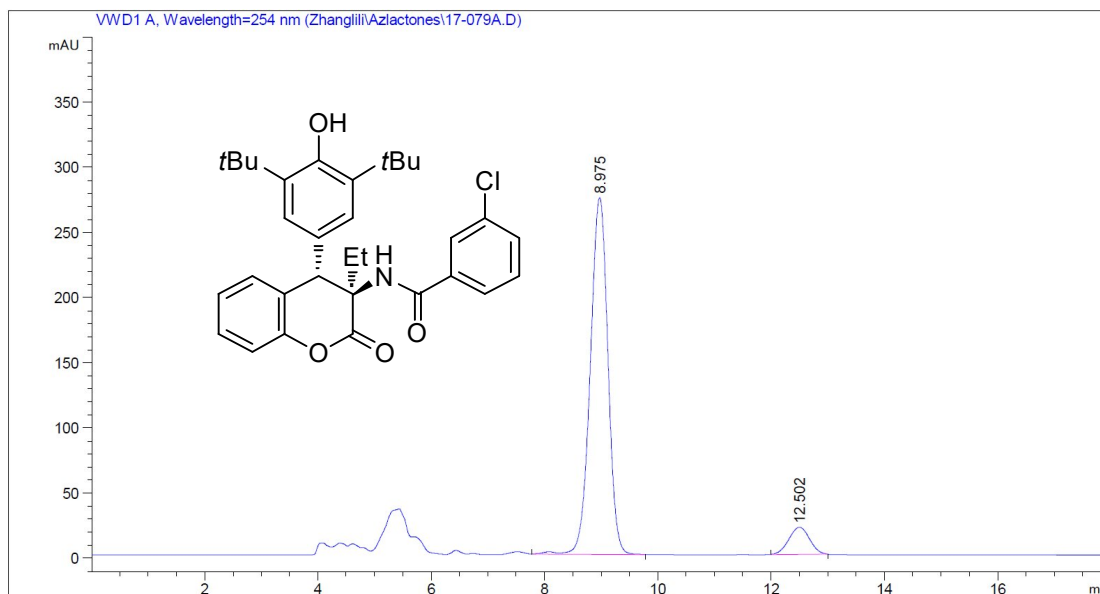

| # | Time   | Area   | Height | Width  | Symmetry | Area % |
|---|--------|--------|--------|--------|----------|--------|
| 1 | 8.975  | 5923.3 | 273.7  | 0.3606 | 1.109    | 91.876 |
| 2 | 12.502 | 523.8  | 20.7   | 0.421  | 1.018    | 8.124  |



**3-Bromo-*N*-((3*R*,4*S*)-4-(3,5-di-*tert*-butyl-4-hydroxyphenyl)-3-ethyl-2-oxochroman-3-yl)benzamide (3a)**

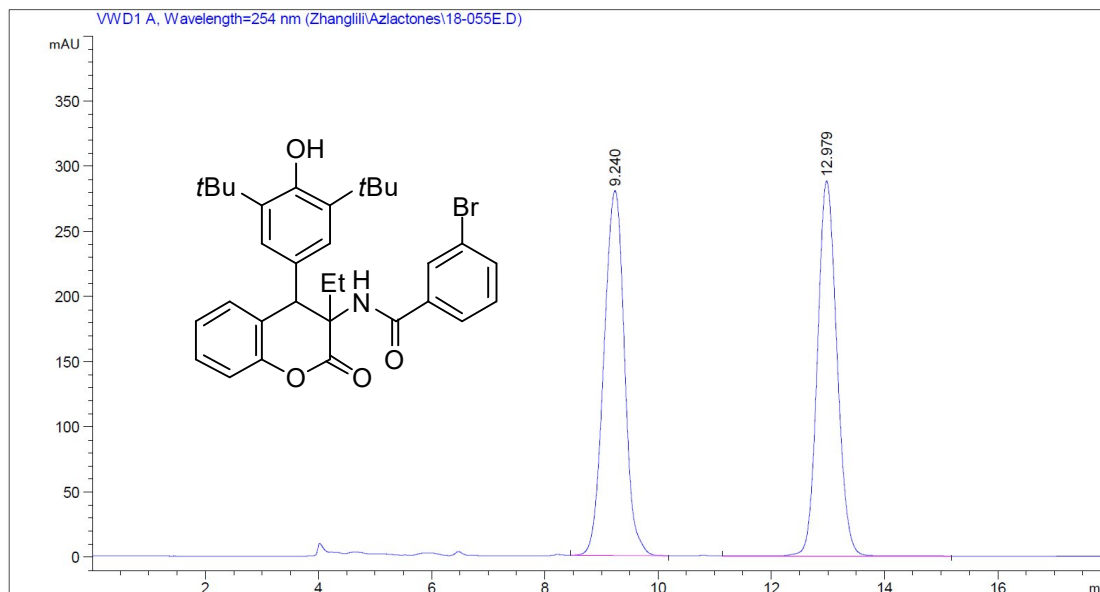

| # | Time   | Area   | Height | Width  | Symmetry | Area % |
|---|--------|--------|--------|--------|----------|--------|
| 1 | 9.24   | 7051.1 | 279.9  | 0.4199 | 1.13     | 50.644 |
| 2 | 12.979 | 6871.8 | 287.9  | 0.3978 | 0.865    | 49.356 |

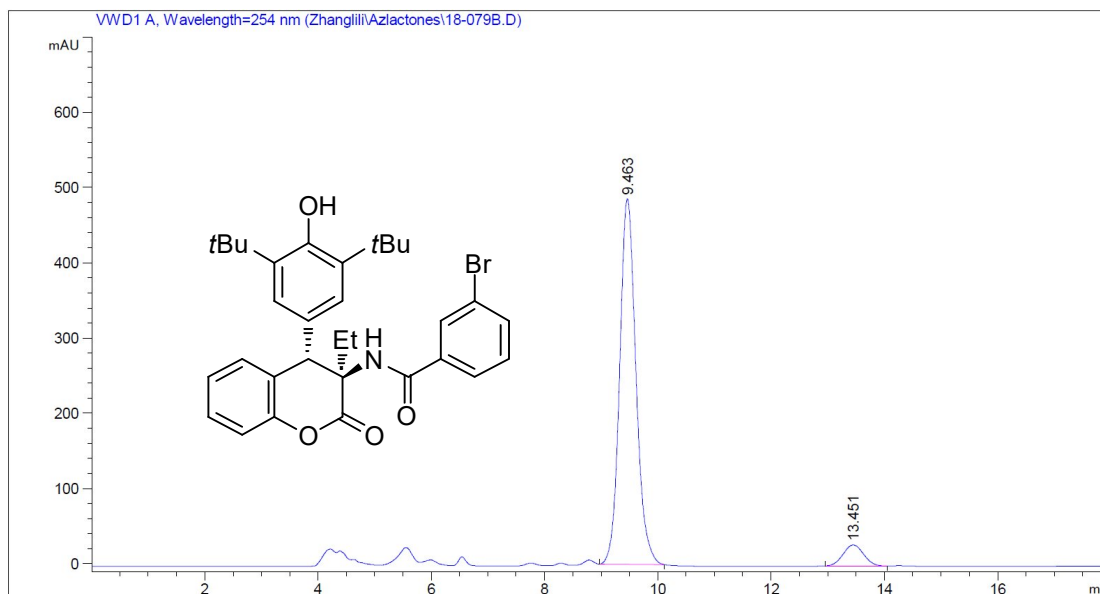

| # | Time   | Area   | Height | Width  | Symmetry | Area % |
|---|--------|--------|--------|--------|----------|--------|
| 1 | 9.463  | 9693.2 | 485.8  | 0.3325 | 0.863    | 93.199 |
| 2 | 13.451 | 707.3  | 28.1   | 0.4201 | 0.958    | 6.801  |

***N*-((3*R*,4*S*)-4-(3,5-di-*tert*-butyl-4-hydroxyphenyl)-3-ethyl-2-oxochroman-3-yl)-3-methylbenzamide (3am)**

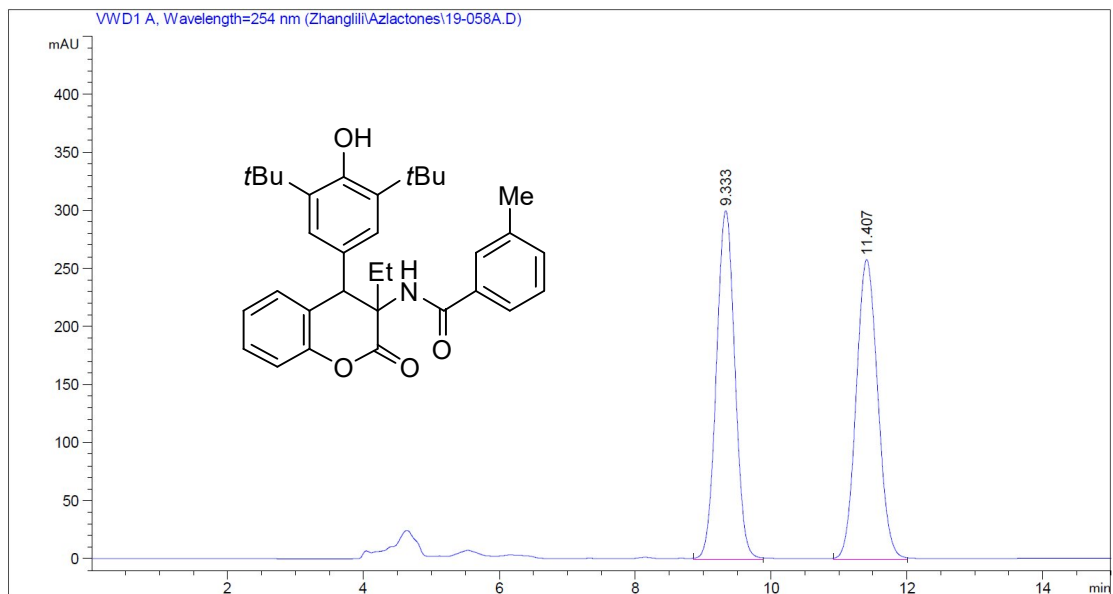

| # | Time   | Area   | Height | Width  | Symmetry | Area % |
|---|--------|--------|--------|--------|----------|--------|
| 1 | 9.333  | 5670.2 | 300.2  | 0.3148 | 0.981    | 49.949 |
| 2 | 11.407 | 5681.8 | 258.1  | 0.3669 | 0.909    | 50.051 |

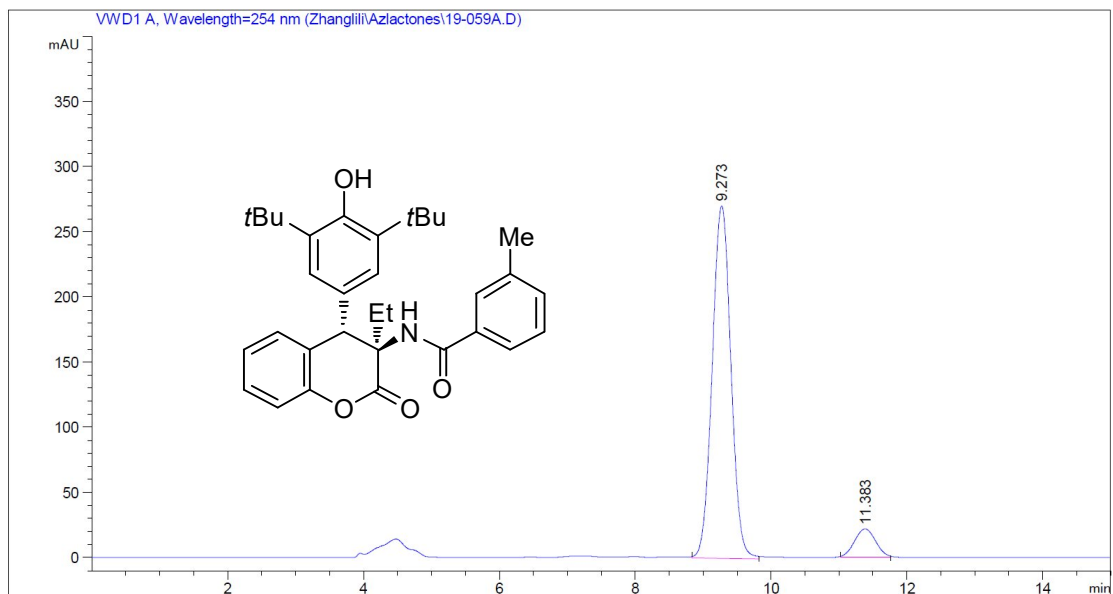

| # | Time   | Area   | Height | Width  | Symmetry | Area % |
|---|--------|--------|--------|--------|----------|--------|
| 1 | 9.273  | 5163.9 | 270.5  | 0.3182 | 0.979    | 91.917 |
| 2 | 11.383 | 454.1  | 21.5   | 0.352  | 0.978    | 8.083  |

**2-Bromo-*N*-((3*R*,4*S*)-4-(3,5-di-*tert*-butyl-4-hydroxyphenyl)-3-ethyl-2-oxochroman-3-yl)benzamide (3an)**

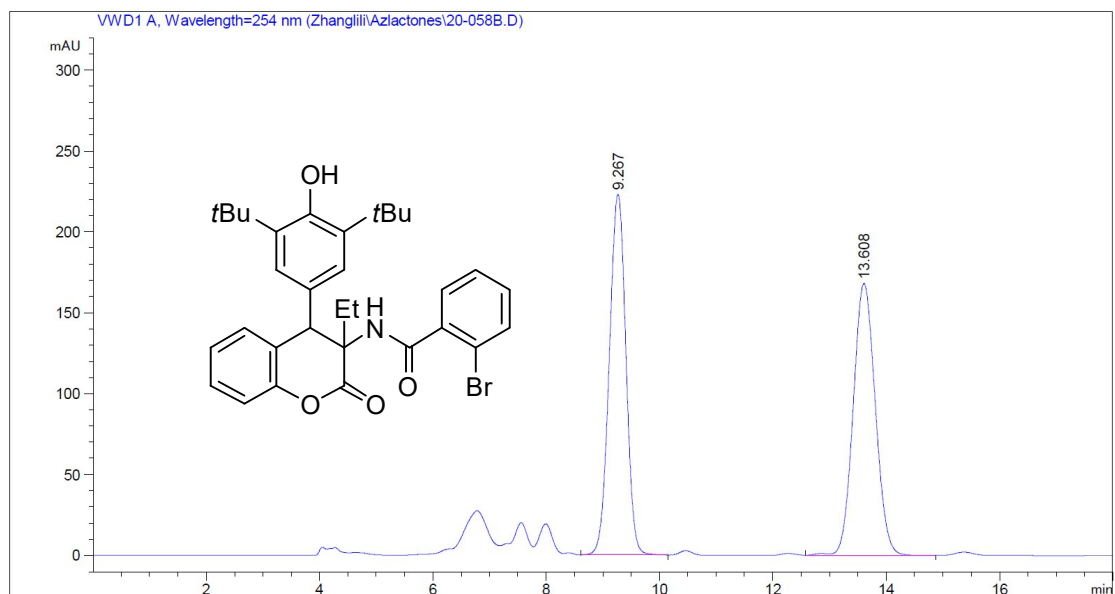

| # | Time   | Area   | Height | Width  | Symmetry | Area % |
|---|--------|--------|--------|--------|----------|--------|
| 1 | 9.267  | 4537.9 | 223    | 0.3204 | 1.059    | 49.956 |
| 2 | 13.608 | 4545.9 | 168    | 0.4237 | 0.916    | 50.044 |

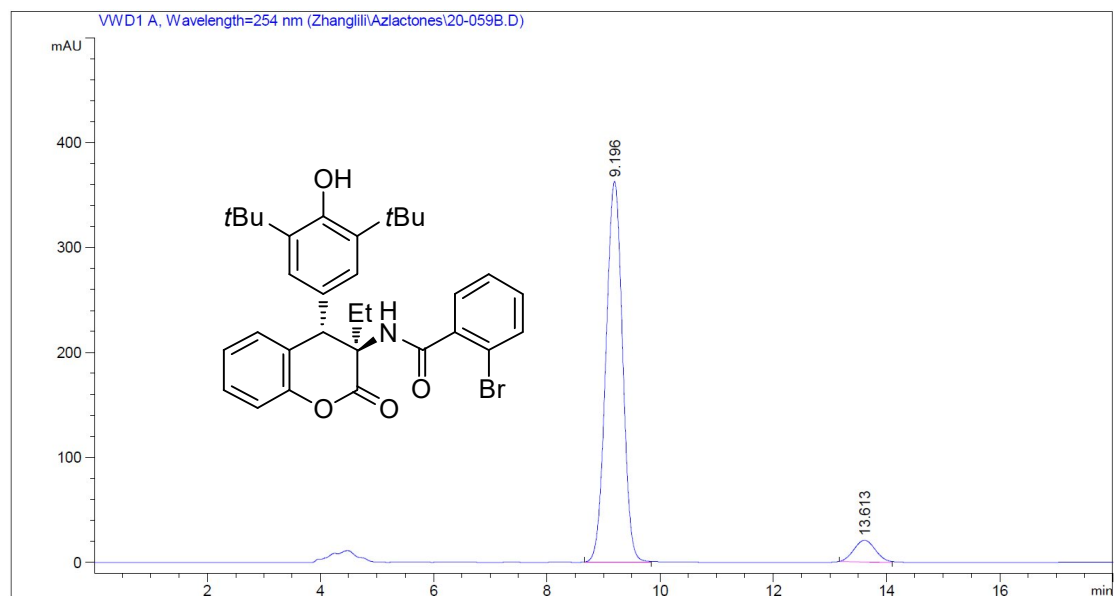

| # | Time   | Area   | Height | Width  | Symmetry | Area % |
|---|--------|--------|--------|--------|----------|--------|
| 1 | 9.196  | 7441.1 | 363.2  | 0.3415 | 1.034    | 93.018 |
| 2 | 13.613 | 558.5  | 20.9   | 0.4454 | 0.939    | 6.982  |

***N*-((3*R*,4*S*)-4-(3,5-di-*tert*-butyl-4-hydroxyphenyl)-3-ethyl-2-oxochroman-3-yl)-2-naphthamide (3ao)**

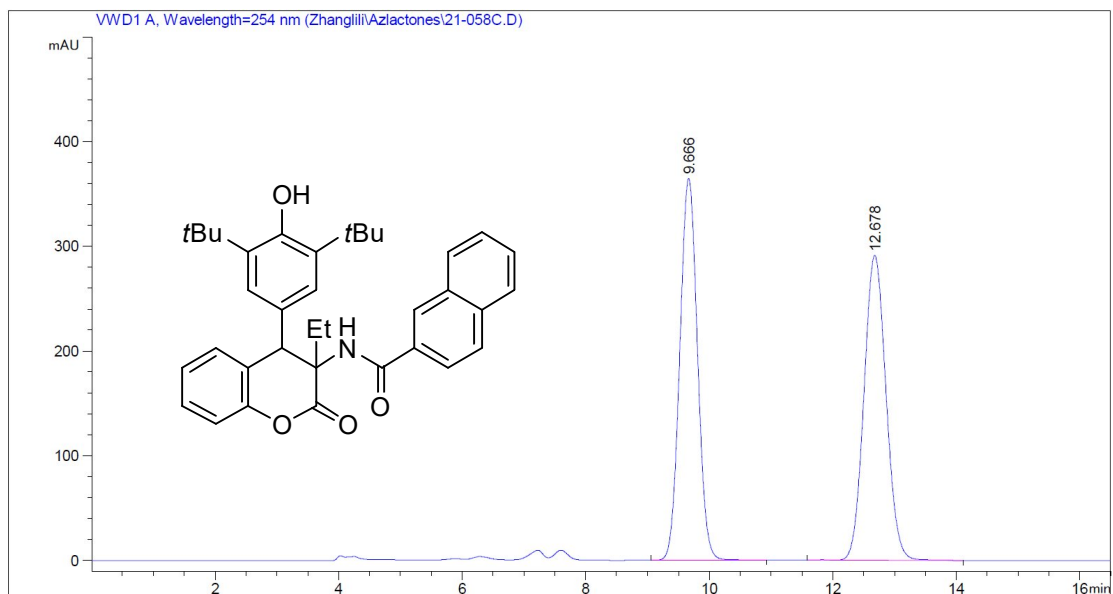

| # | Time   | Area   | Height | Width  | Symmetry | Area % |
|---|--------|--------|--------|--------|----------|--------|
| 1 | 9.666  | 7227.2 | 364.8  | 0.3102 | 0.959    | 50.076 |
| 2 | 12.678 | 7205.3 | 291.1  | 0.3857 | 0.91     | 49.924 |

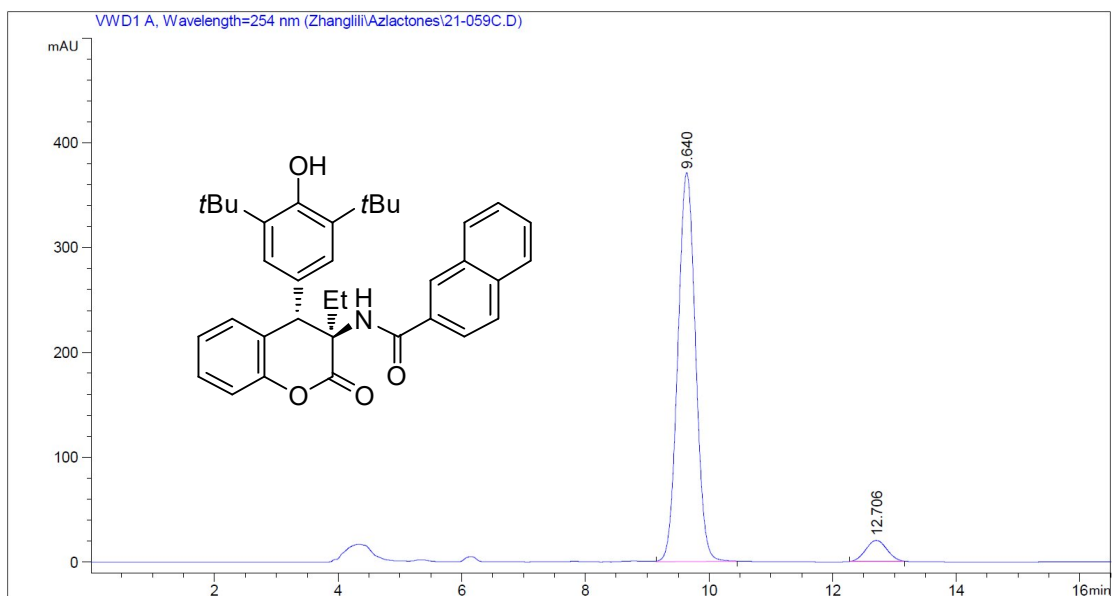

| # | Time   | Area   | Height | Width  | Symmetry | Area % |
|---|--------|--------|--------|--------|----------|--------|
| 1 | 9.64   | 7375.1 | 371.2  | 0.3311 | 0.967    | 93.915 |
| 2 | 12.706 | 477.8  | 20.1   | 0.3953 | 0.964    | 6.085  |

***N*-((3*R*,4*S*)-4-(3,5-di-*tert*-butyl-4-hydroxyphenyl)-3-ethyl-2-oxochroman-3-yl)furan-2-carboxamide (3ap)**

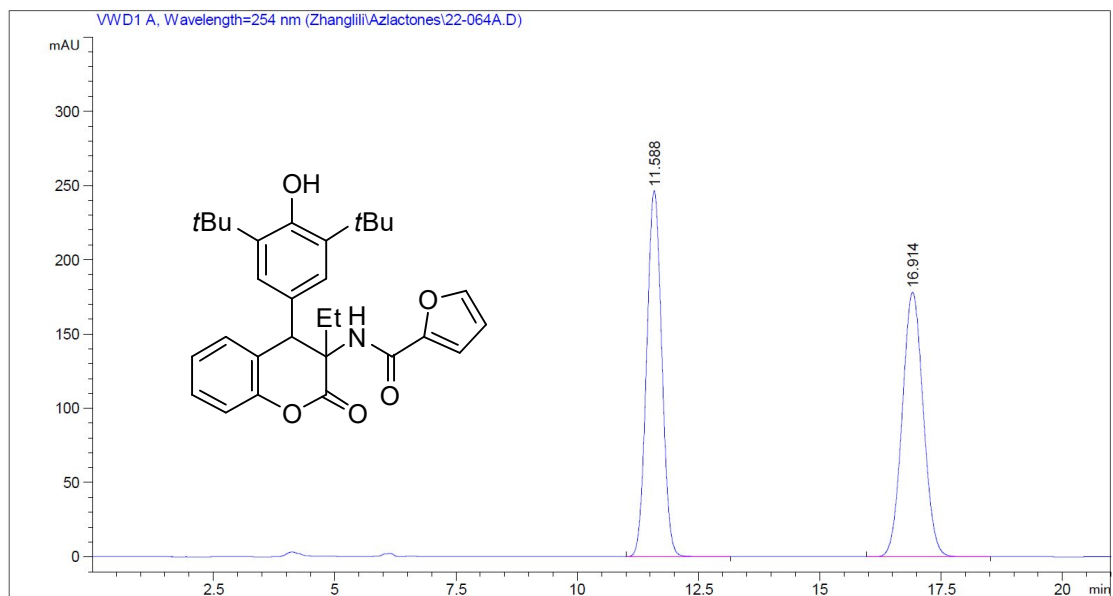

| # | Time   | Area   | Height | Width  | Symmetry | Area % |
|---|--------|--------|--------|--------|----------|--------|
| 1 | 11.588 | 5351.5 | 246.4  | 0.3394 | 0.96     | 49.939 |
| 2 | 16.914 | 5364.7 | 178.1  | 0.4704 | 0.932    | 50.061 |

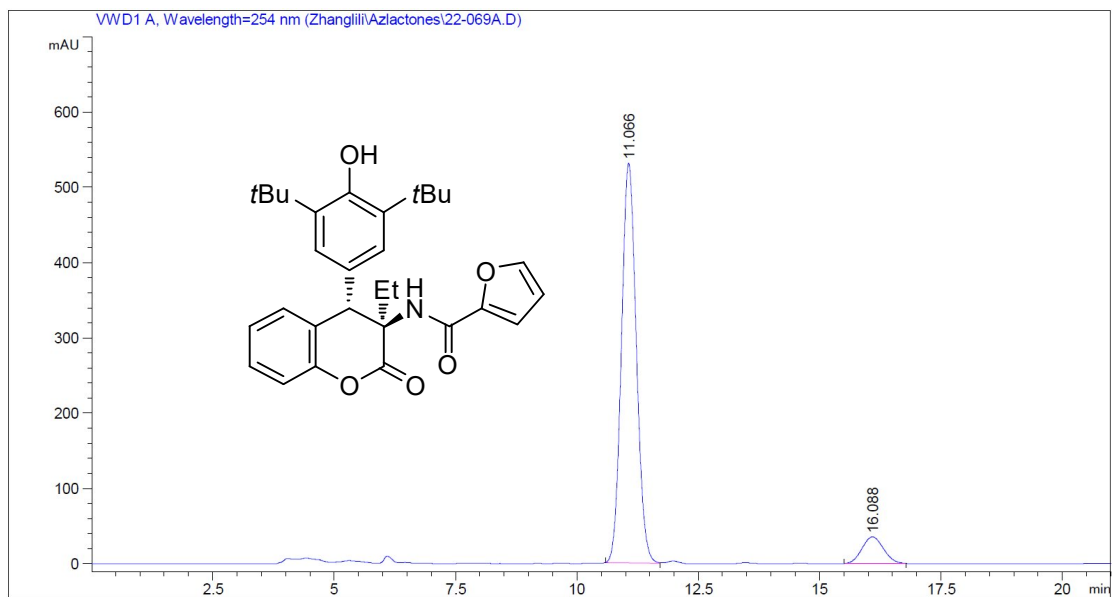

| # | Time   | Area    | Height | Width  | Symmetry | Area % |
|---|--------|---------|--------|--------|----------|--------|
| 1 | 11.066 | 11303.3 | 530.7  | 0.355  | 0.91     | 91.114 |
| 2 | 16.088 | 1102.4  | 35.6   | 0.5166 | 0.92     | 8.886  |

***N*-((3*R*,4*S*)-4-(3,5-di-*tert*-butyl-4-hydroxyphenyl)-3-ethyl-2-oxochroman-3-yl)thiophene-2-carboxamide (3aq)**

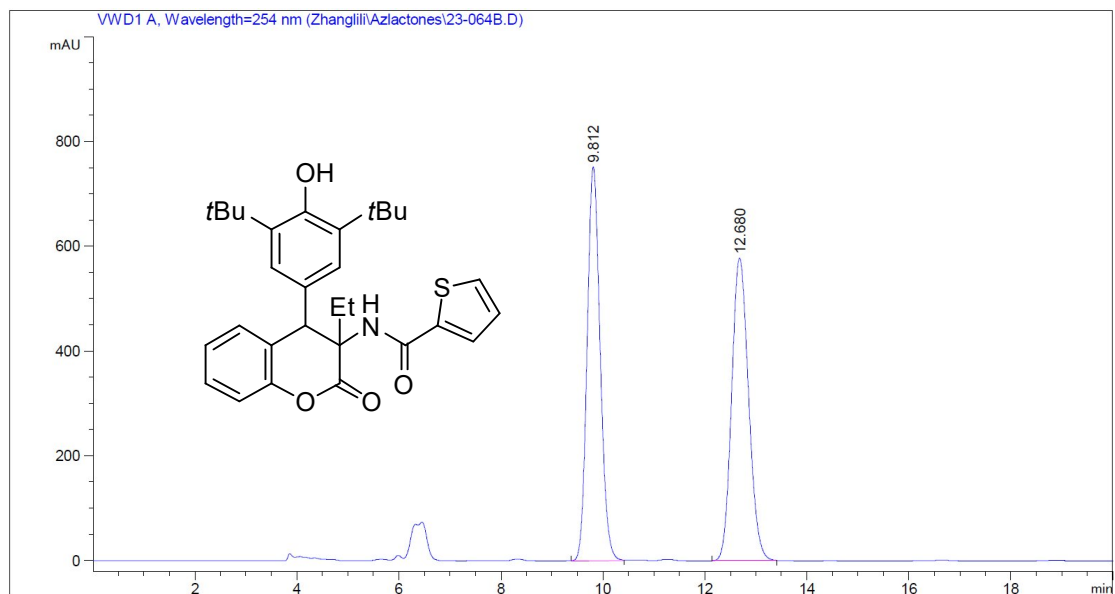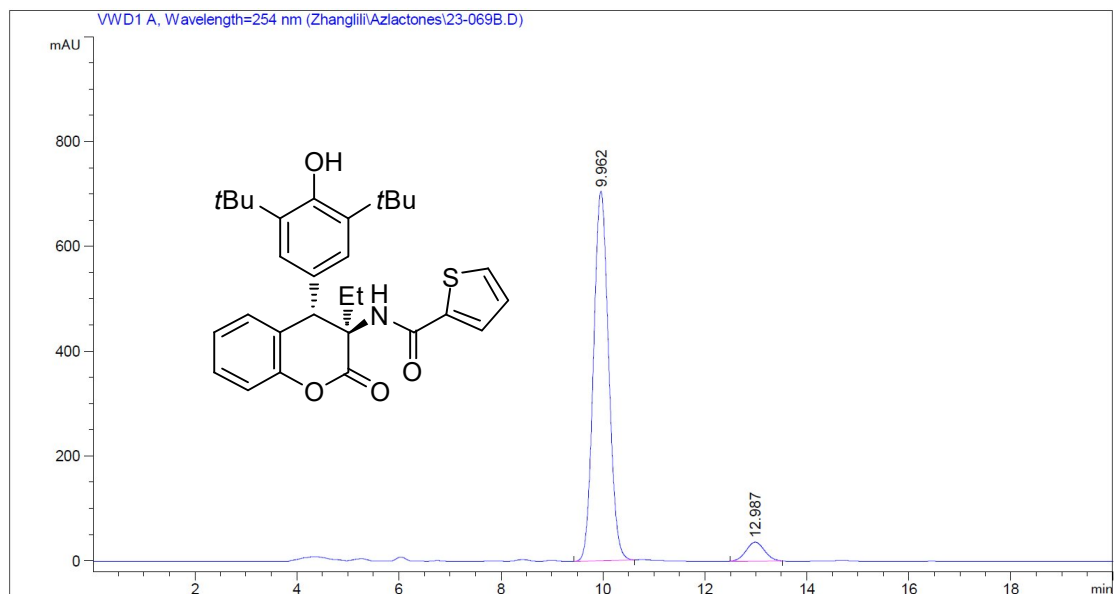

## G: NMR Analysis

### *N*-((3*R*,4*S*)-4-(3,5-di-*tert*-butyl-4-hydroxyphenyl)-3-ethyl-2-oxochroman-3-yl)-4-methoxybenzamide (3aa)

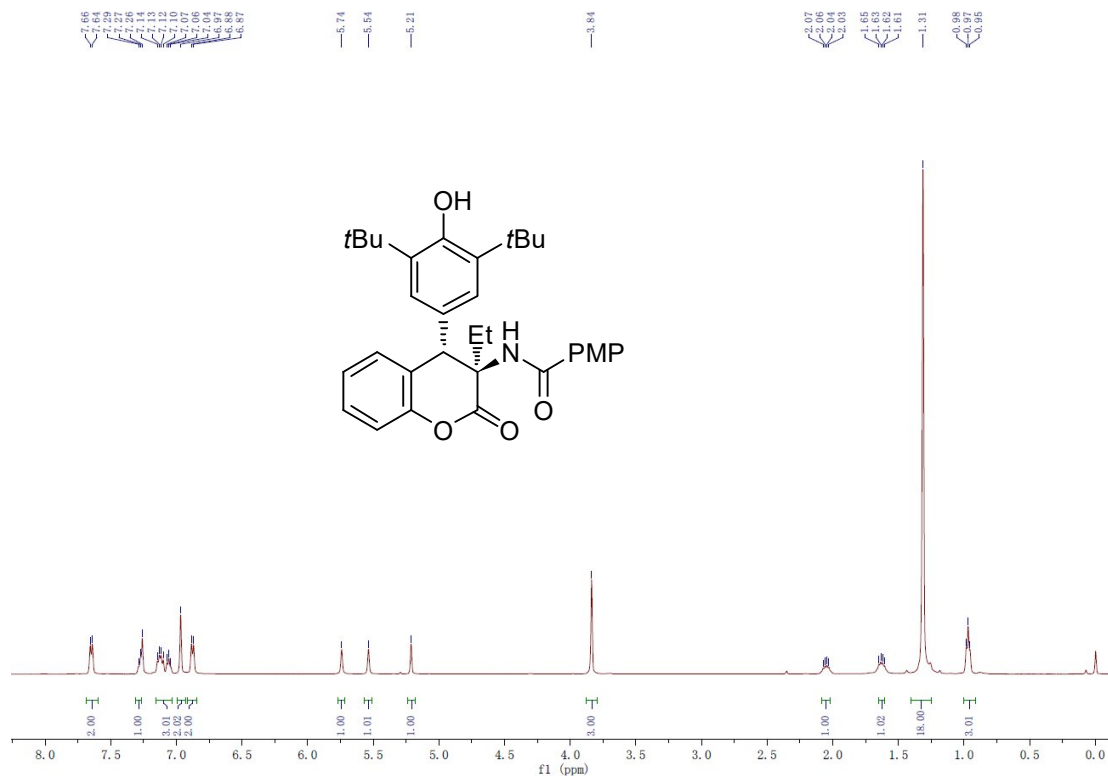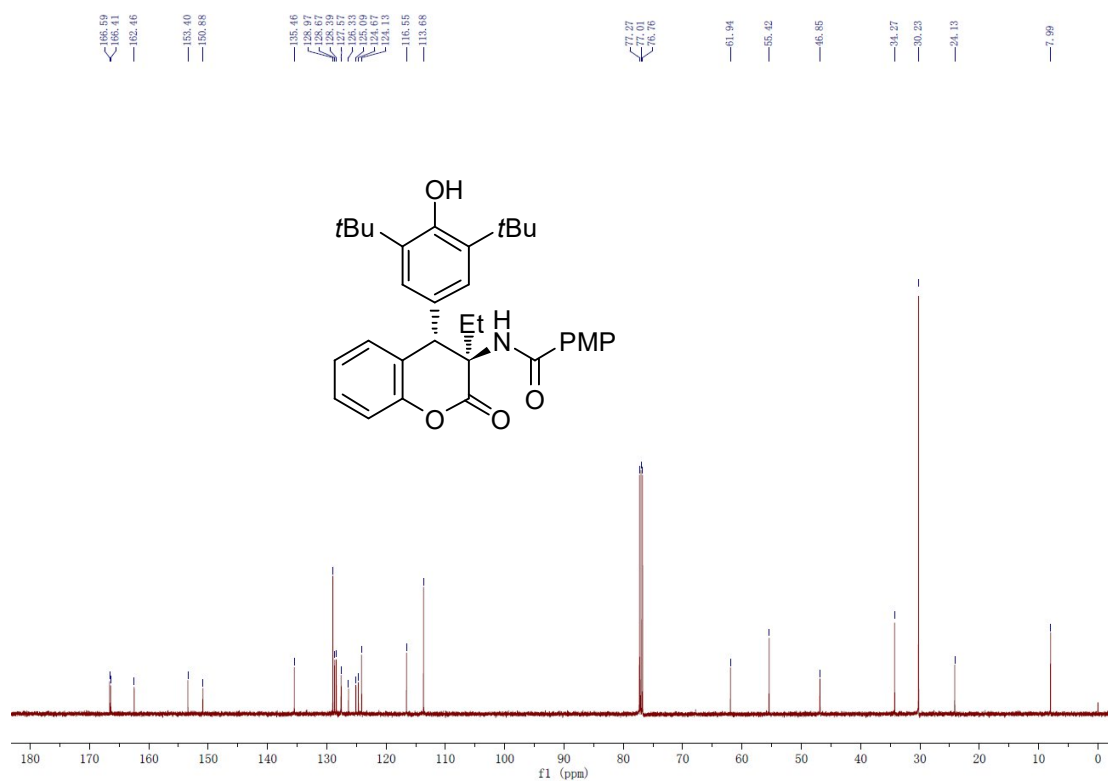

***N*-((3*R*,4*S*)-4-(3,5-di-*tert*-butyl-4-hydroxyphenyl)-3-ethyl-6-fluoro-2-oxochroman-3-yl)-4-methoxybenzamide (3ba)**

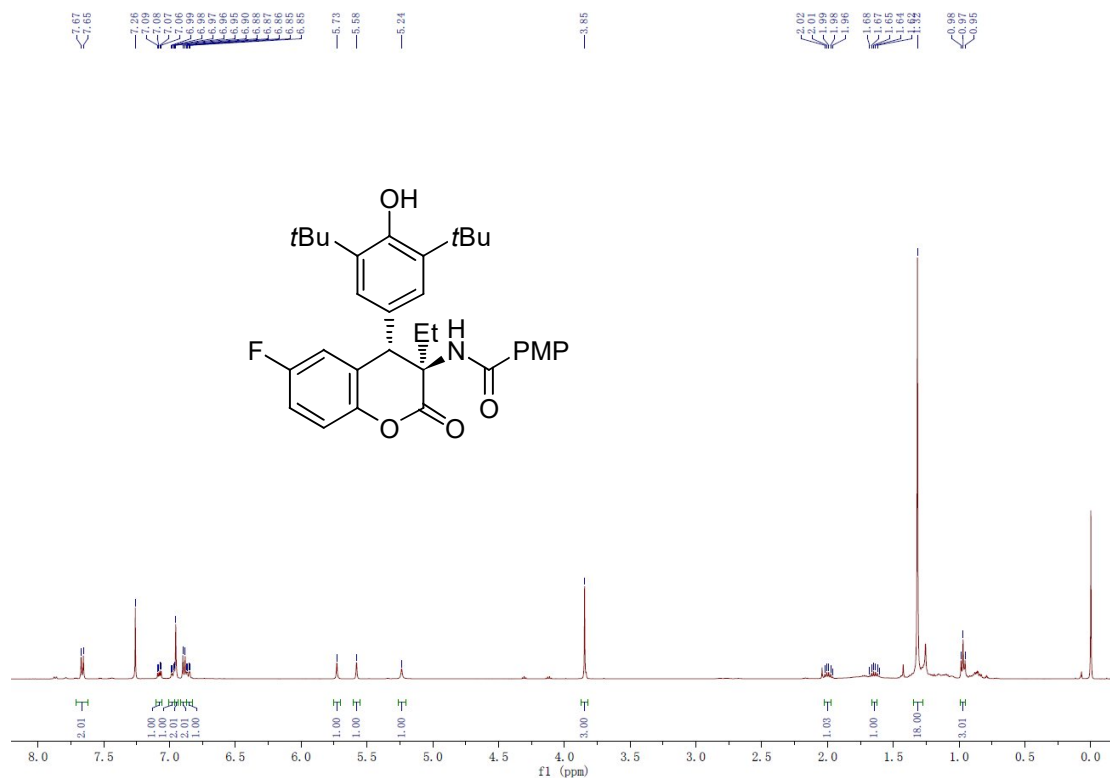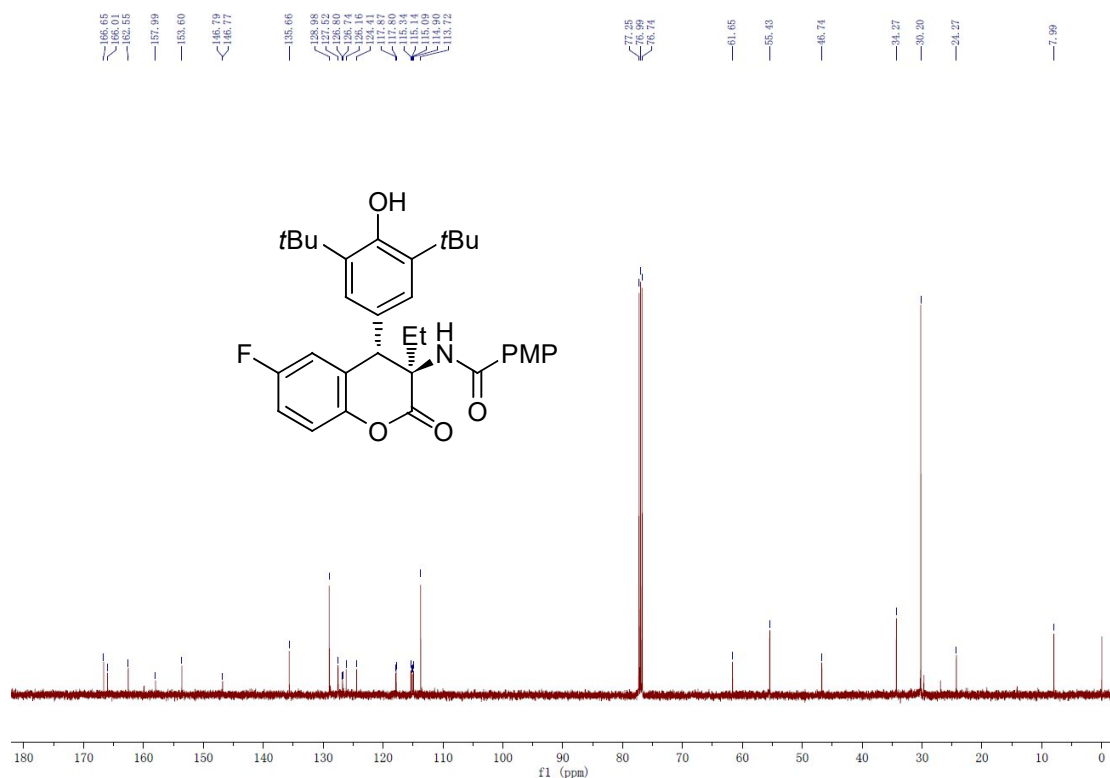



***N*-((3*R*,4*S*)-6-chloro-4-(3,5-di-*tert*-butyl-4-hydroxyphenyl)-3-ethyl-2-oxochroman-3-yl)-4-methoxybenzamide (3ca)**

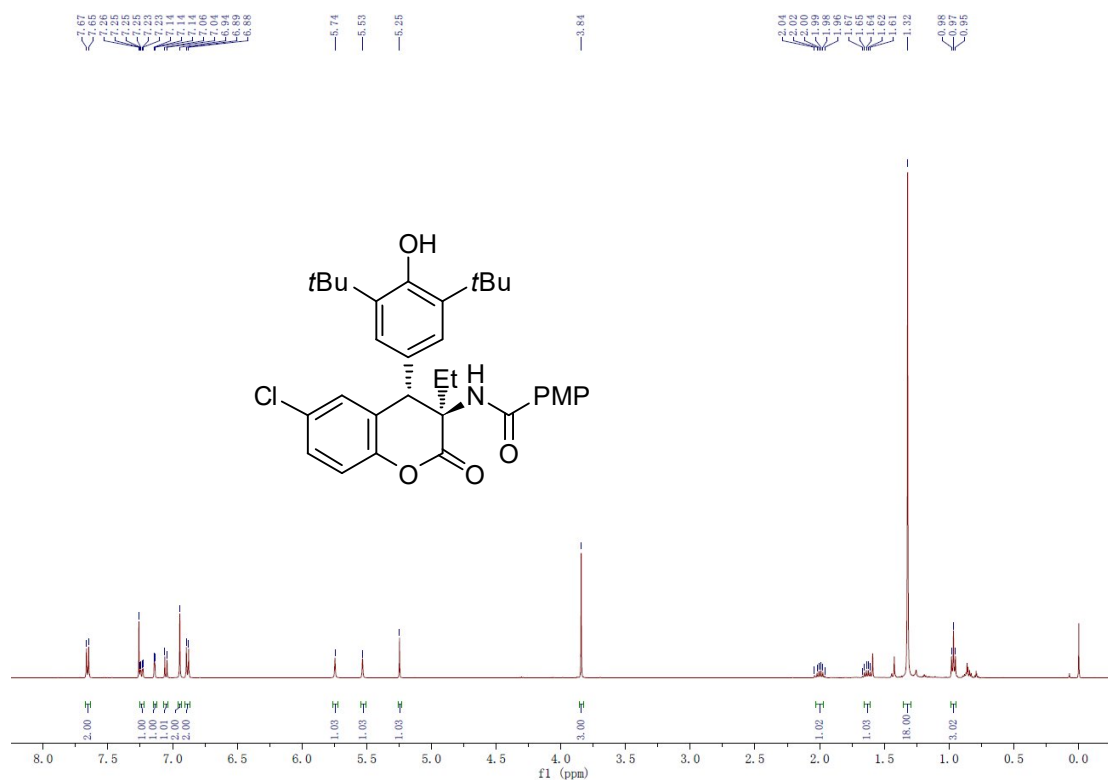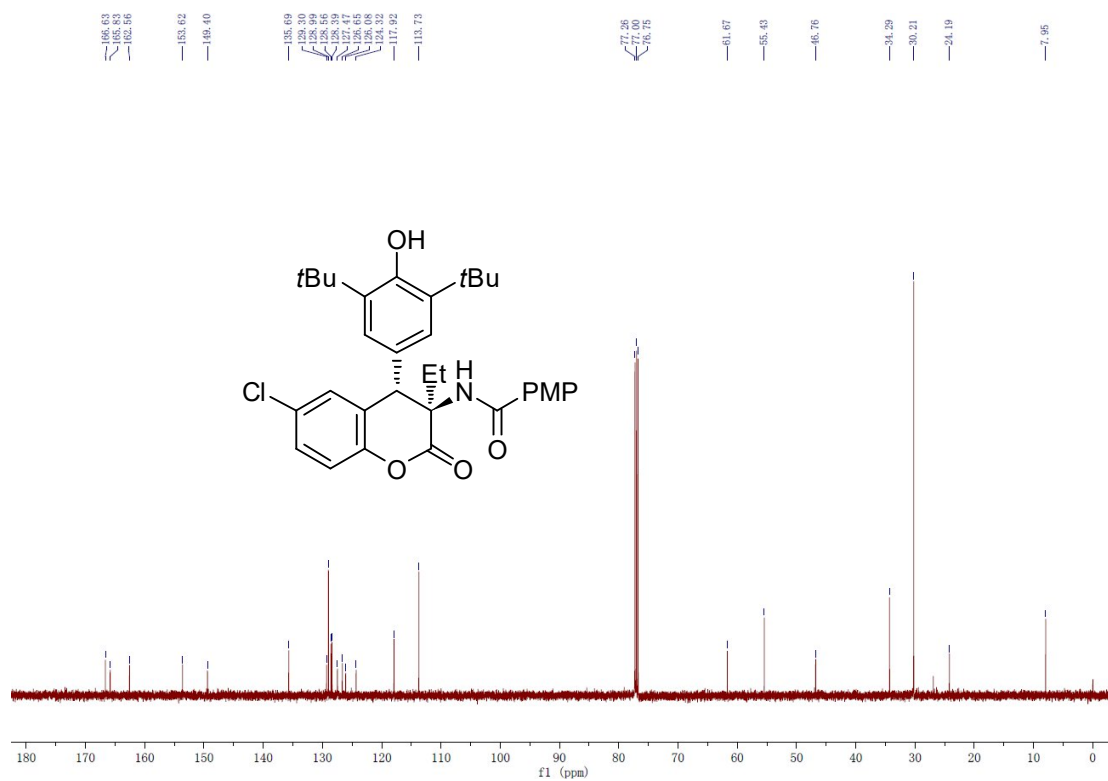

***N*-((3*R*,4*S*)-6-bromo-4-(3,5-di-*tert*-butyl-4-hydroxyphenyl)-3-ethyl-2-oxochroman-3-yl)-4-methoxybenzamide (3da)**

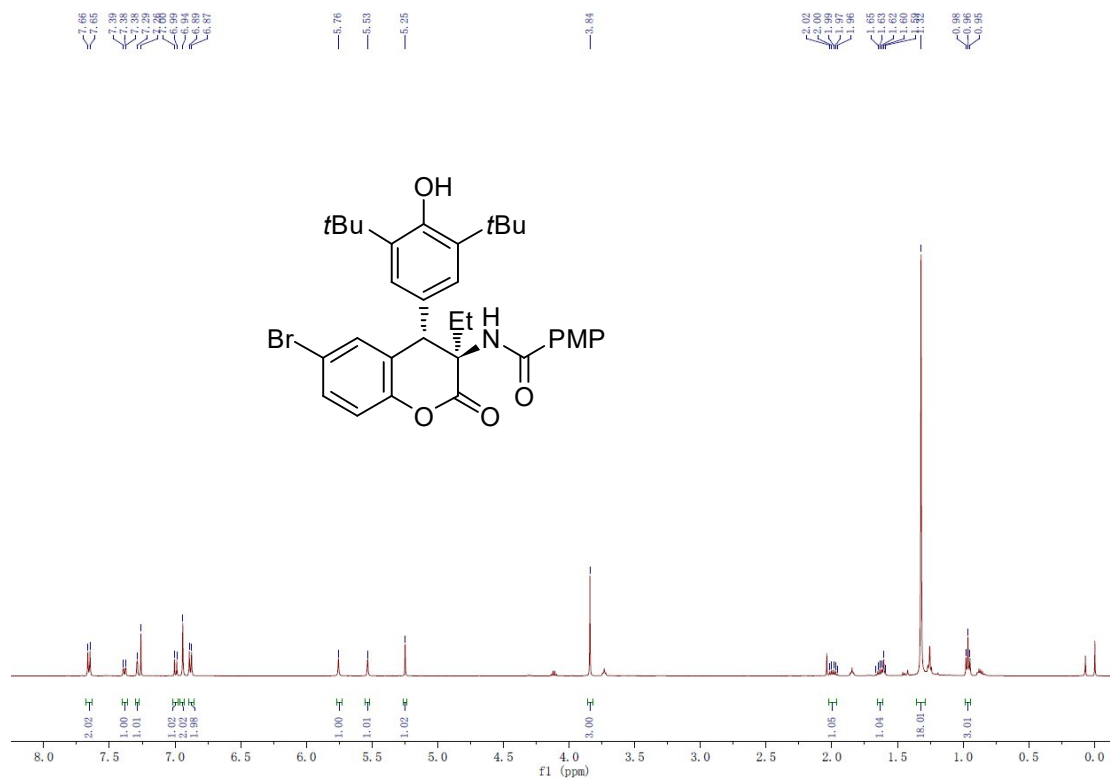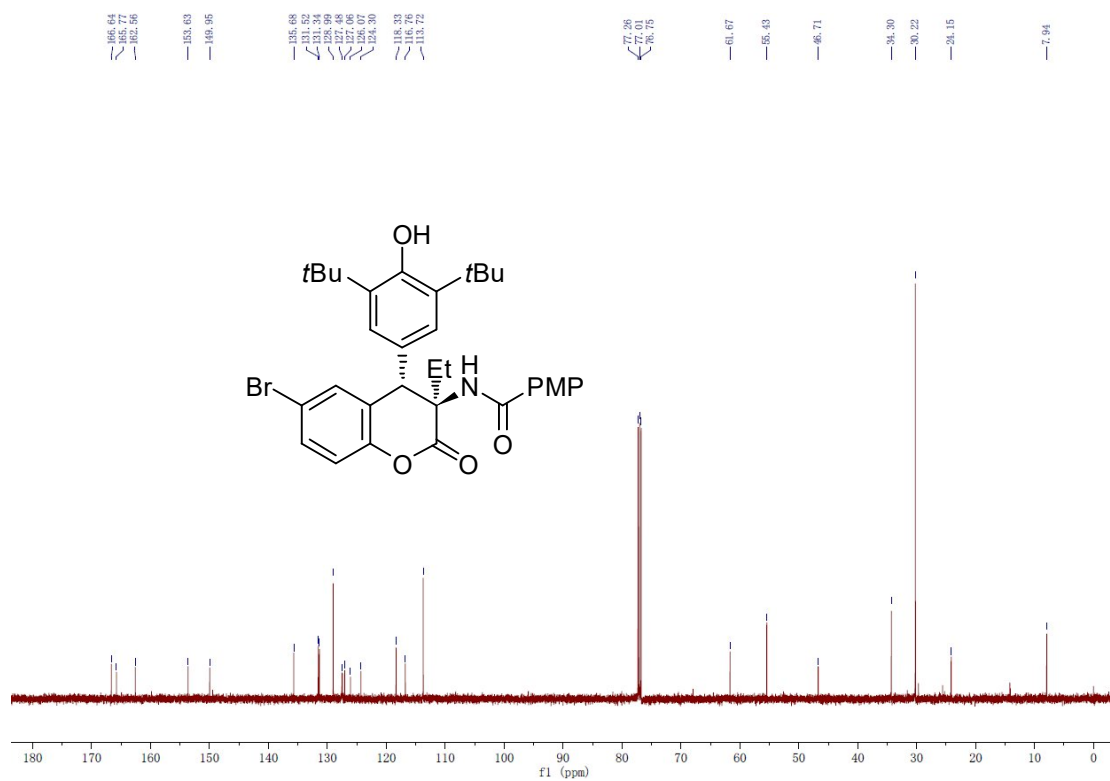

***N*-((3*R*,4*S*)-4-(3,5-di-*tert*-butyl-4-hydroxyphenyl)-3-ethyl-6-methyl-2-oxochroman-3-yl)-4-methoxybenzamide (3ea)**

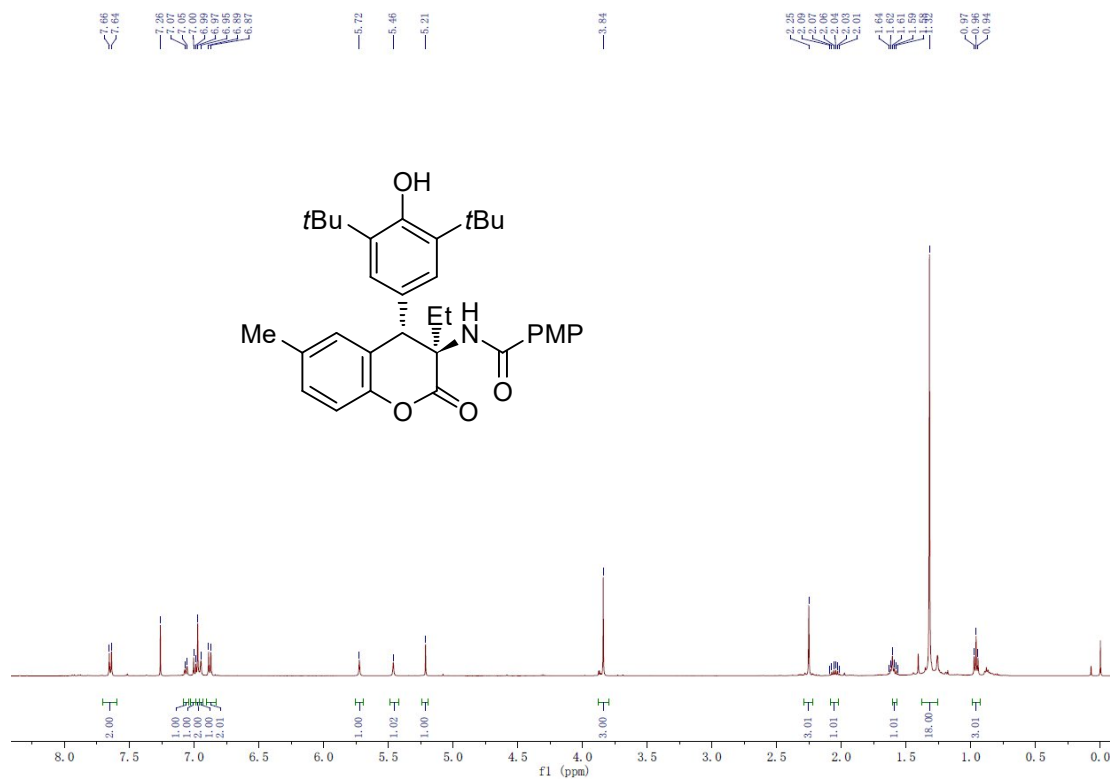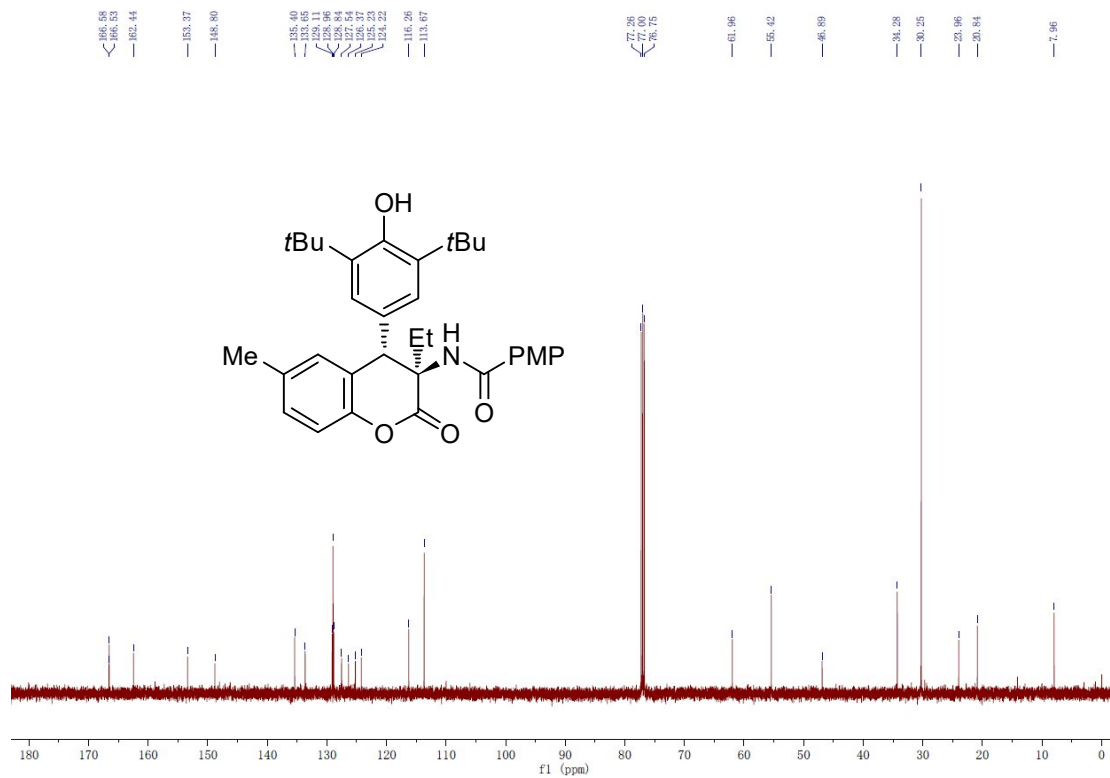

***N*-((3*R*,4*S*)-4-(3,5-di-*tert*-butyl-4-hydroxyphenyl)-3-ethyl-7-methoxy-2-oxochroman-3-yl)-4-methoxybenzamide (3fa)**

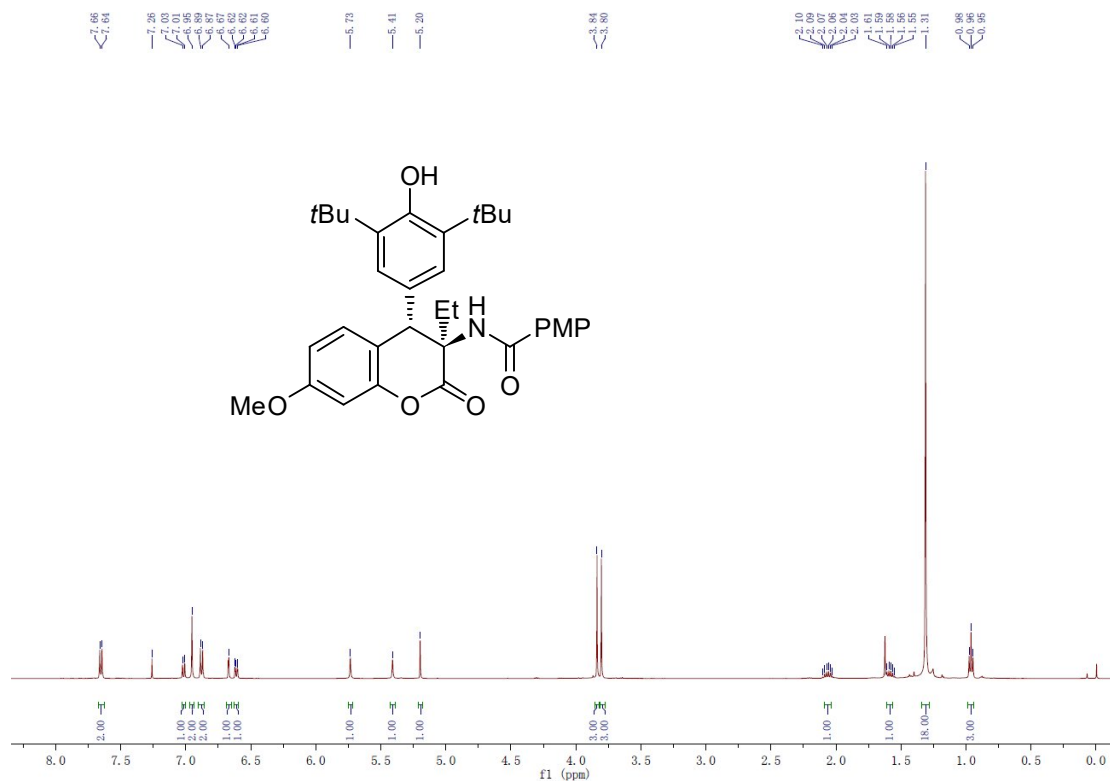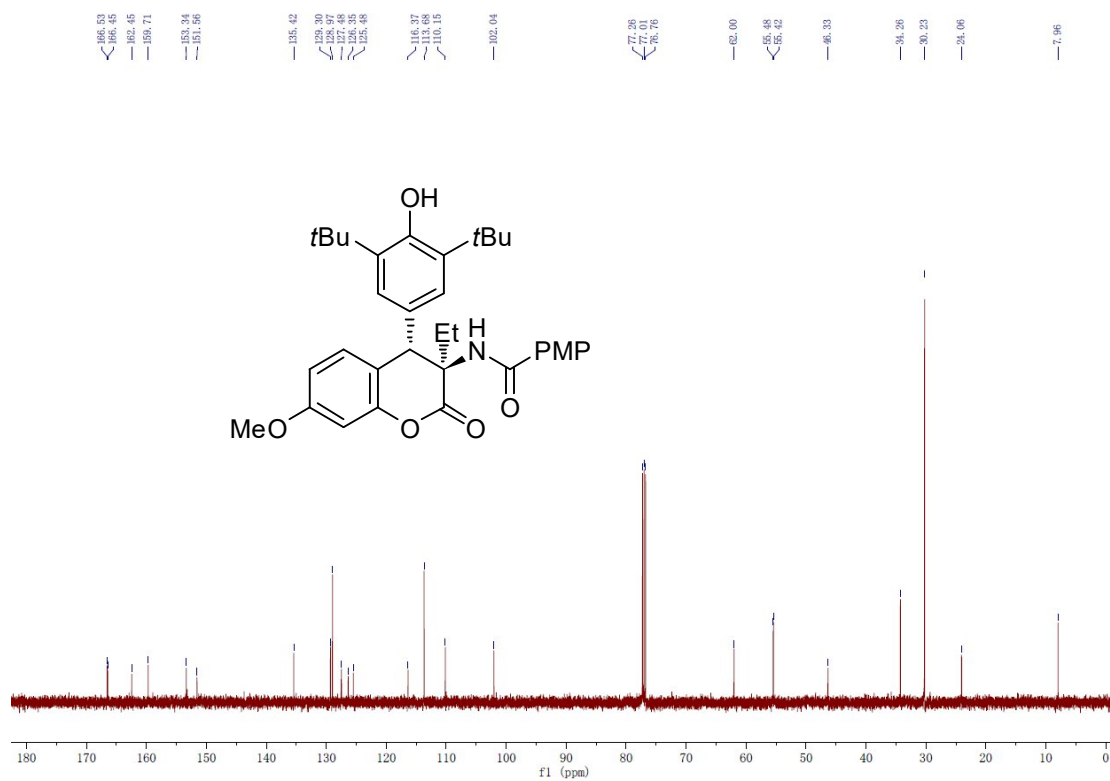

***N*-((1*S*,2*R*)-1-(3,5-di-*tert*-butyl-4-hydroxyphenyl)-2-ethyl-3-oxo-2,3-dihydro-1*H*-benzo[*f*]chromen-2-yl)-4-methoxybenzamide (3ga)**

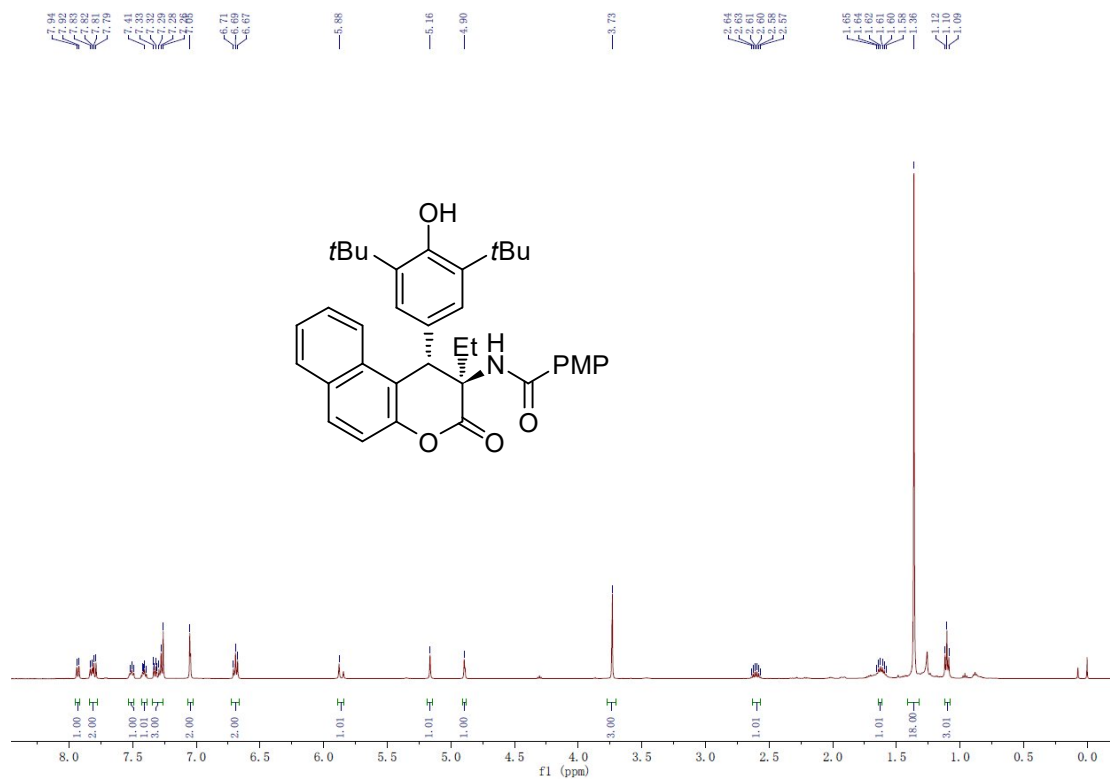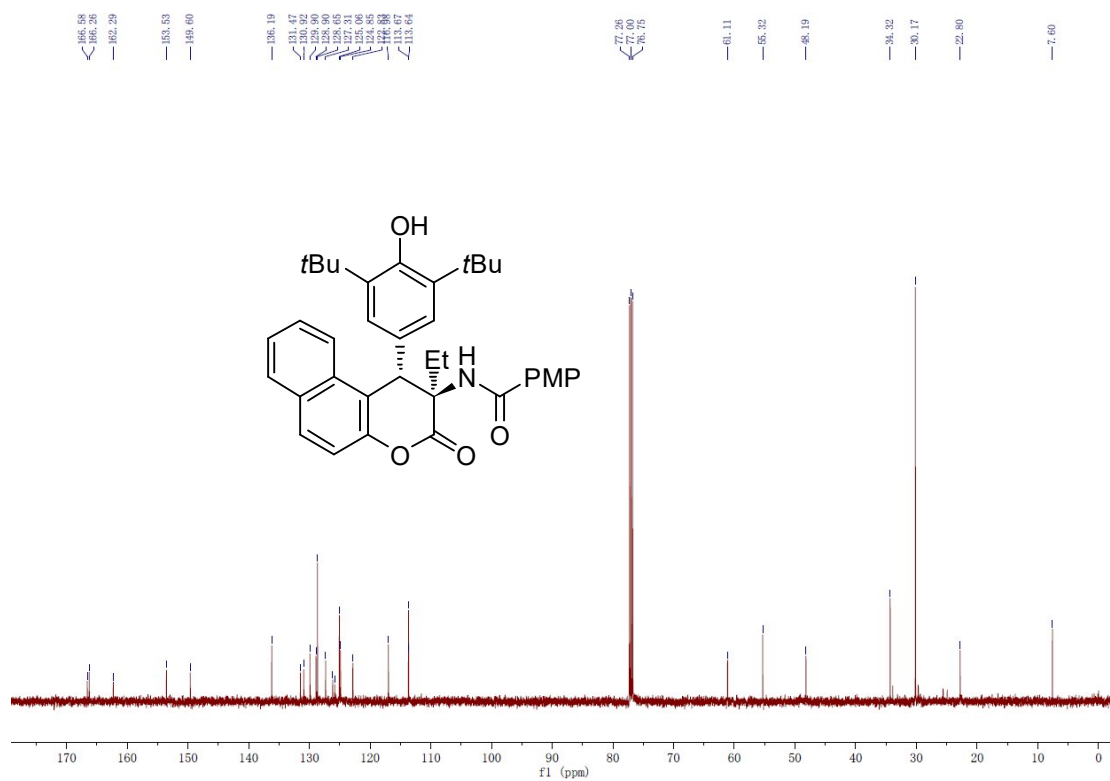

***N*-((3*R*,4*S*)-4-(3,5-di-*tert*-butyl-4-hydroxyphenyl)-2-oxo-3-propylchroman-3-yl)-4-methoxybenzamide (3ab)**

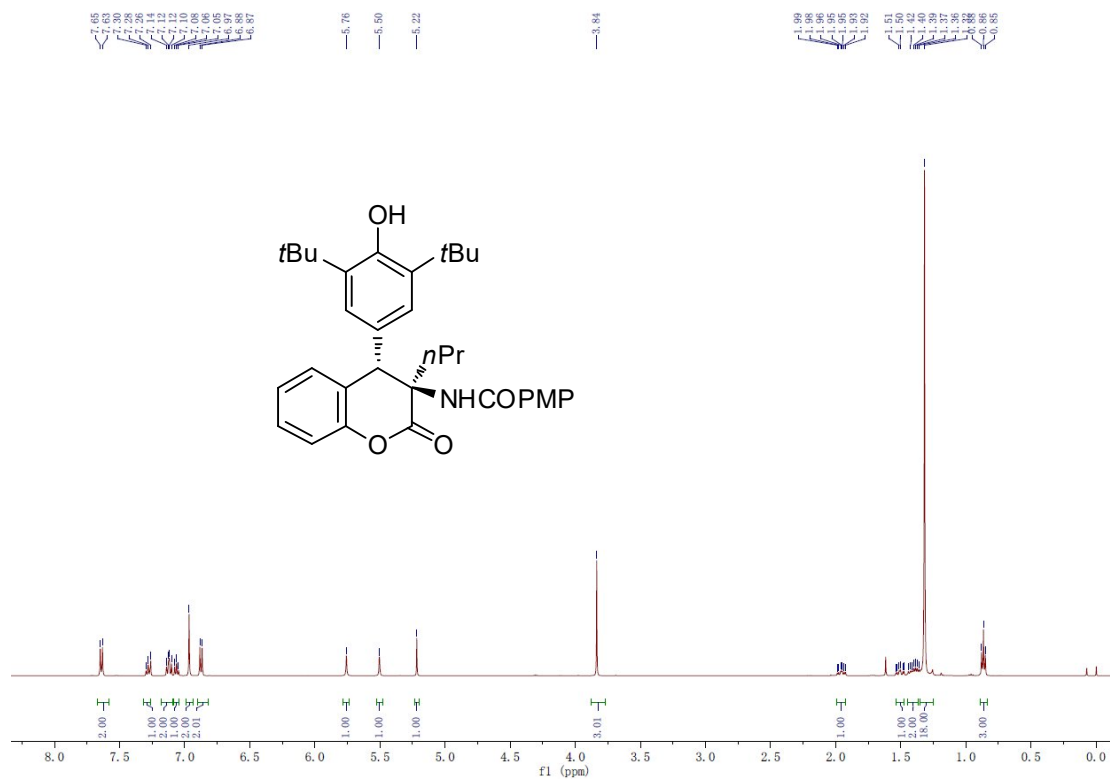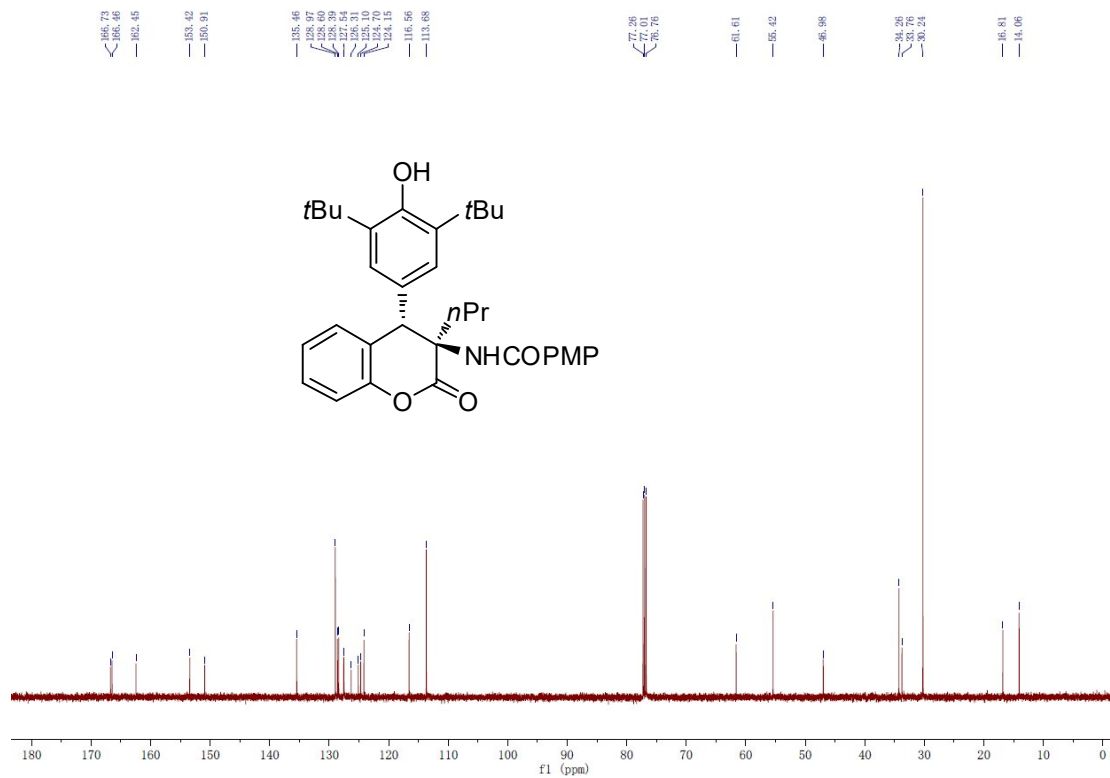

***N*-((3*R*,4*S*)-4-(3,5-di-*tert*-butyl-4-hydroxyphenyl)-3-isopropyl-2-oxochroman-3-yl)-4-methoxybenzamide (3ac)**

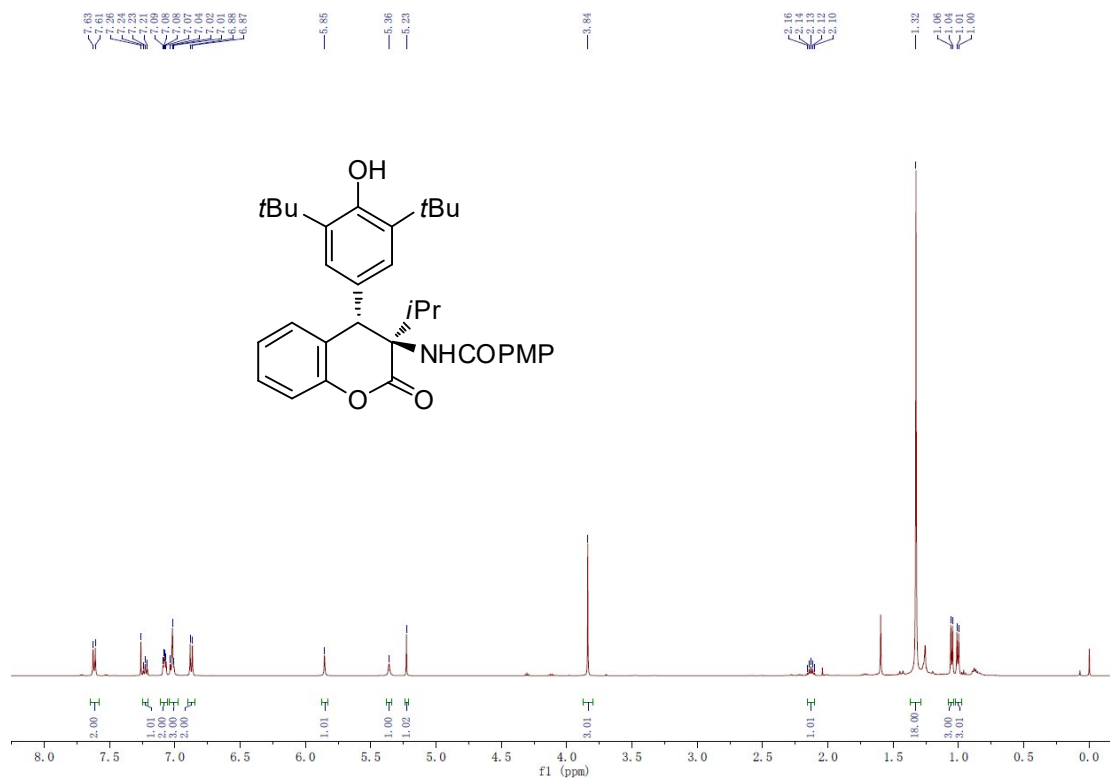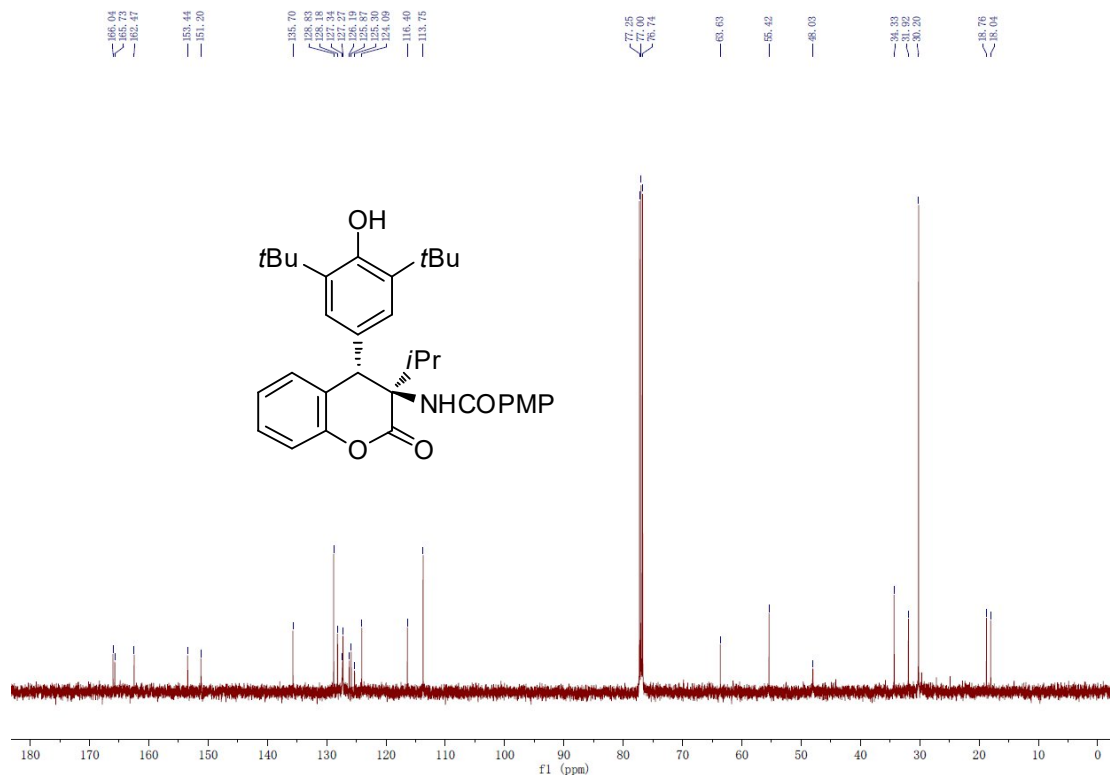

***N*-((3*R*,4*S*)-4-(3,5-di-*tert*-butyl-4-hydroxyphenyl)-3-isobutyl-2-oxochroman-3-yl)-4-methoxybenzamide (3ad)**

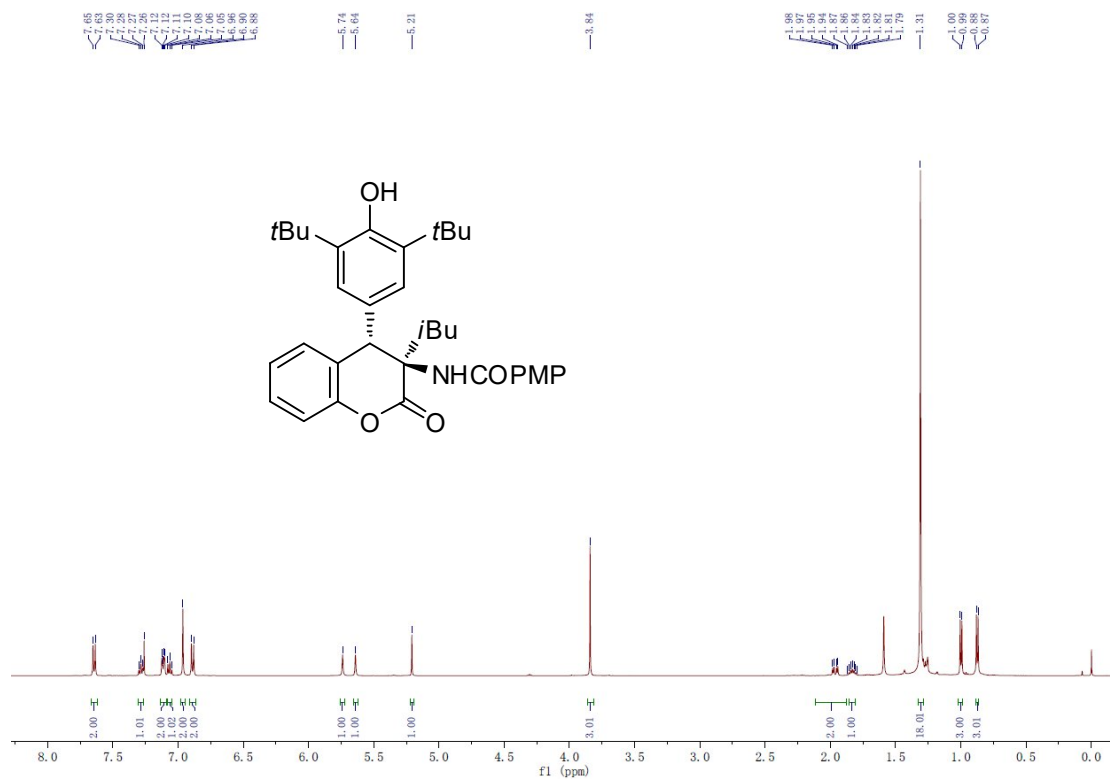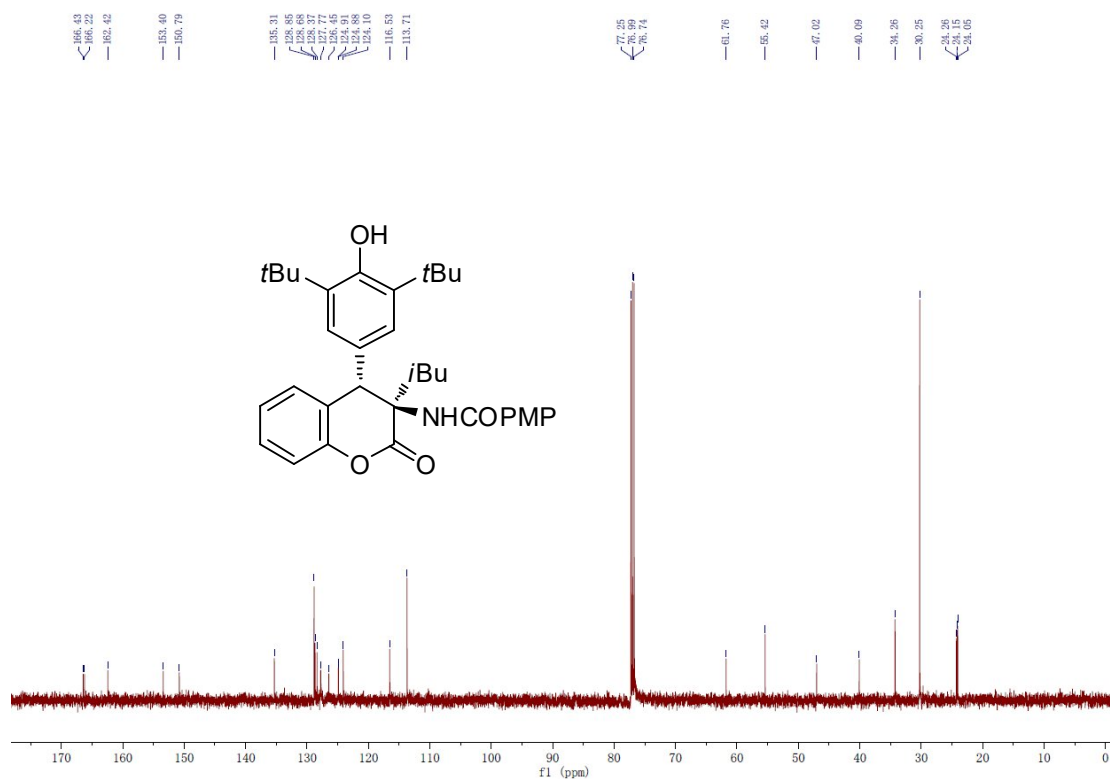



***N*-((3*S*,4*S*)-4-(3,5-di-*tert*-butyl-4-hydroxyphenyl)-2-oxo-3-phenylchroman-3-yl)-4-methoxybenzamide (3ae)**

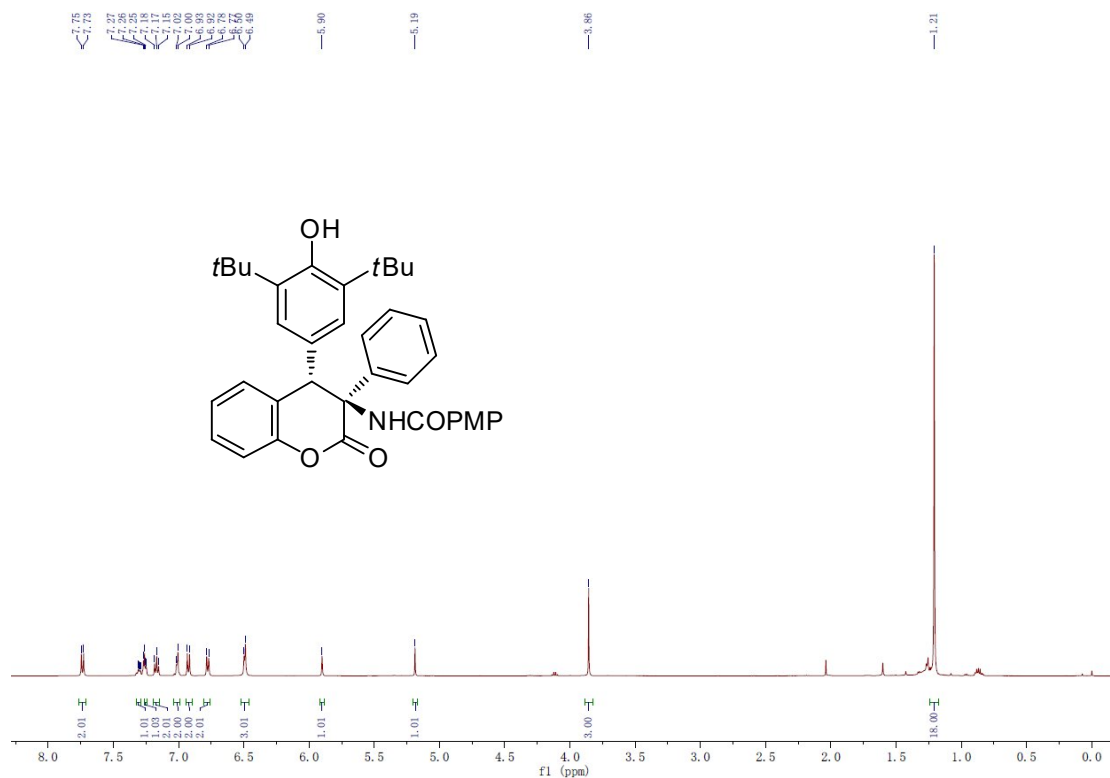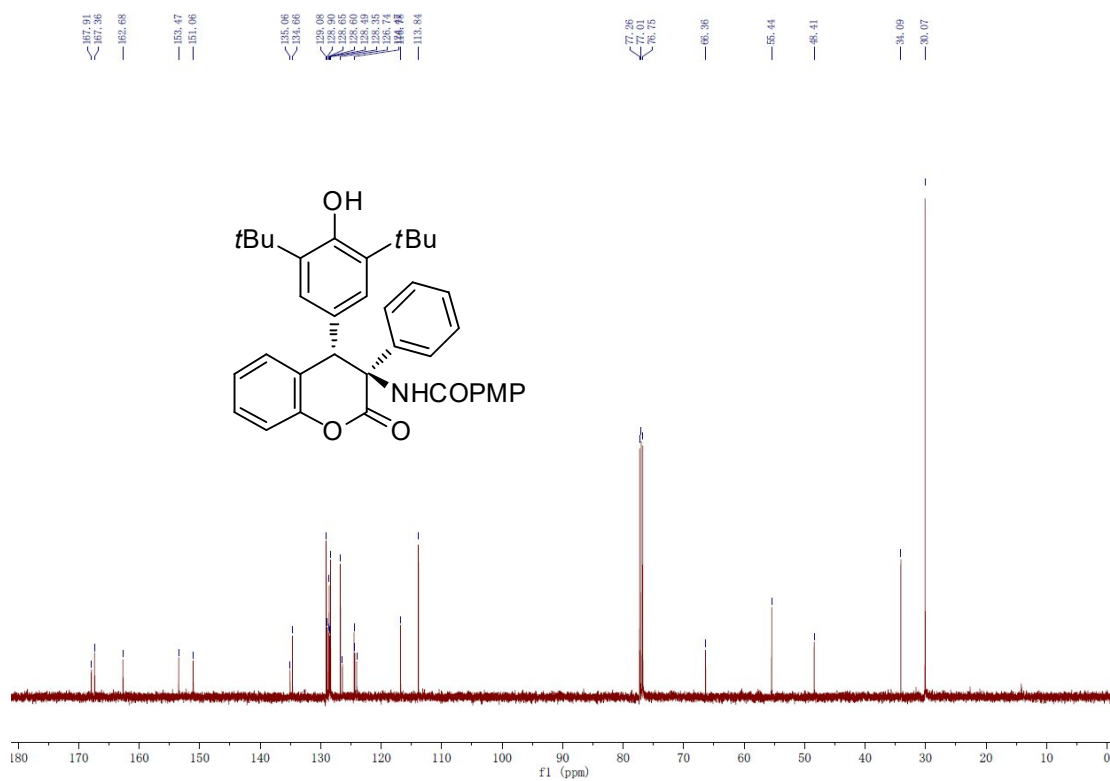

***N*-((3*R*,4*S*)-3-benzyl-4-(3,5-di-*tert*-butyl-4-hydroxyphenyl)-2-oxochroman-3-yl)-4-methoxybenzamide (3af)**

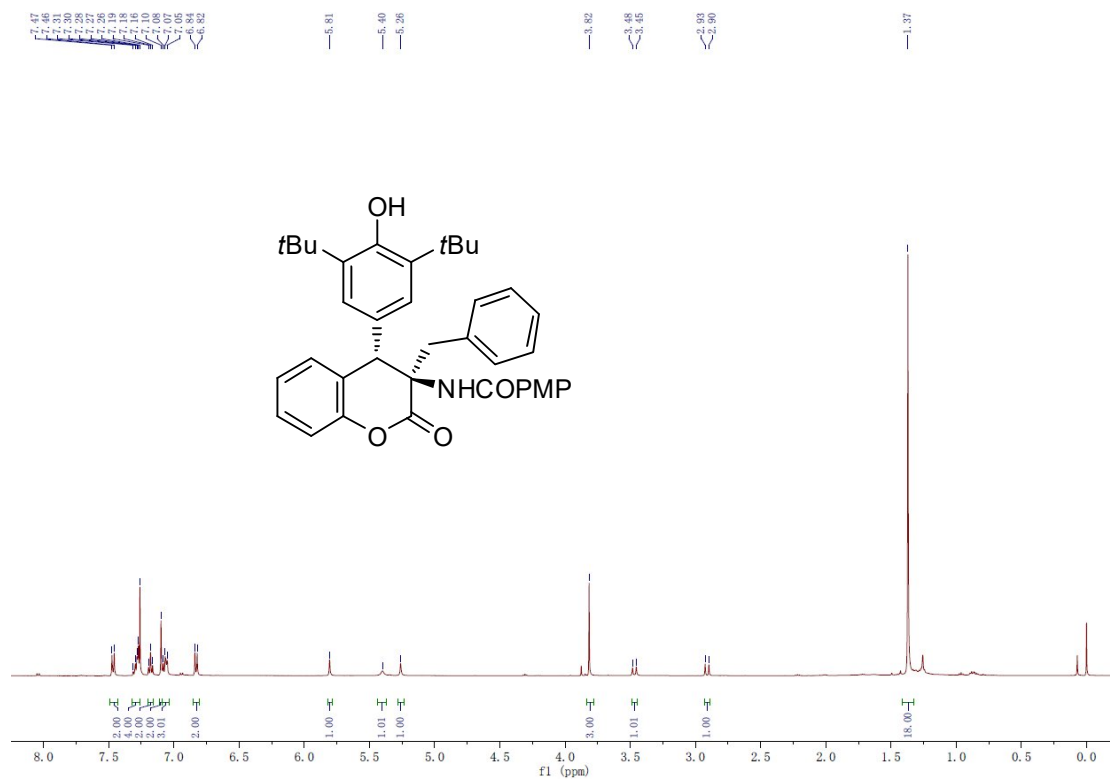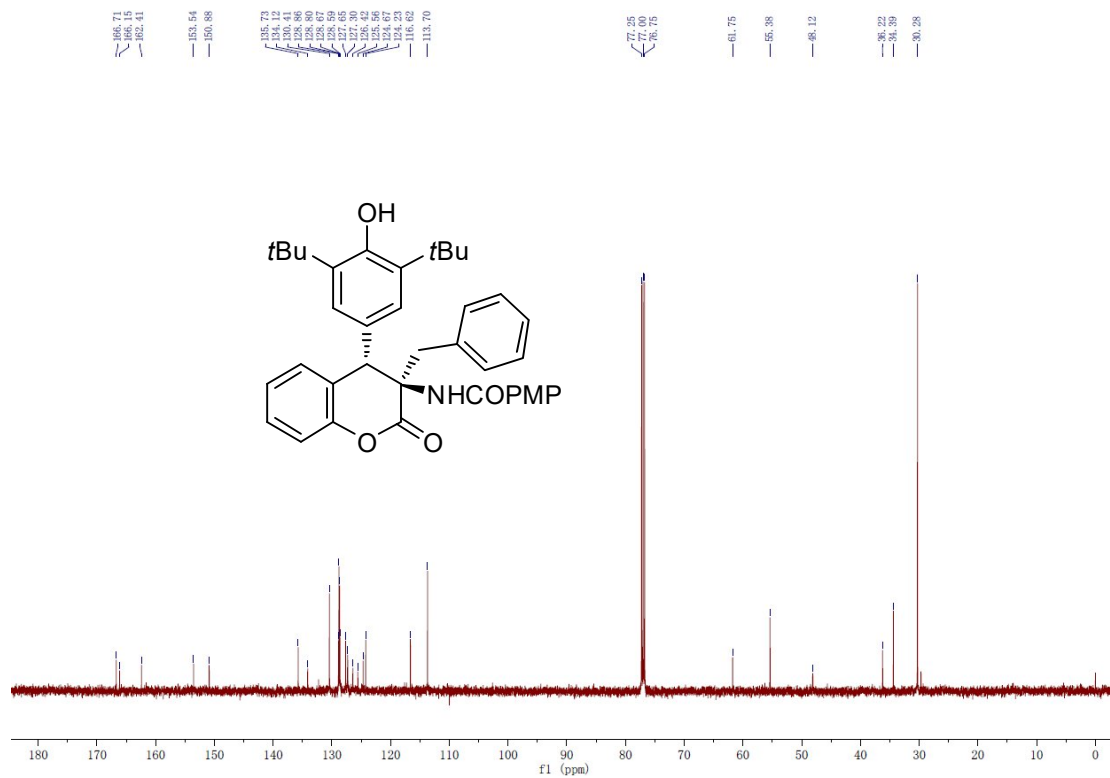

***N*-((3*R*,4*S*)-4-(3,5-di-*tert*-butyl-4-hydroxyphenyl)-3-(2-(methylthio)ethyl)-2-oxochroman-3-yl)-4-methoxybenzamide (3ag)**

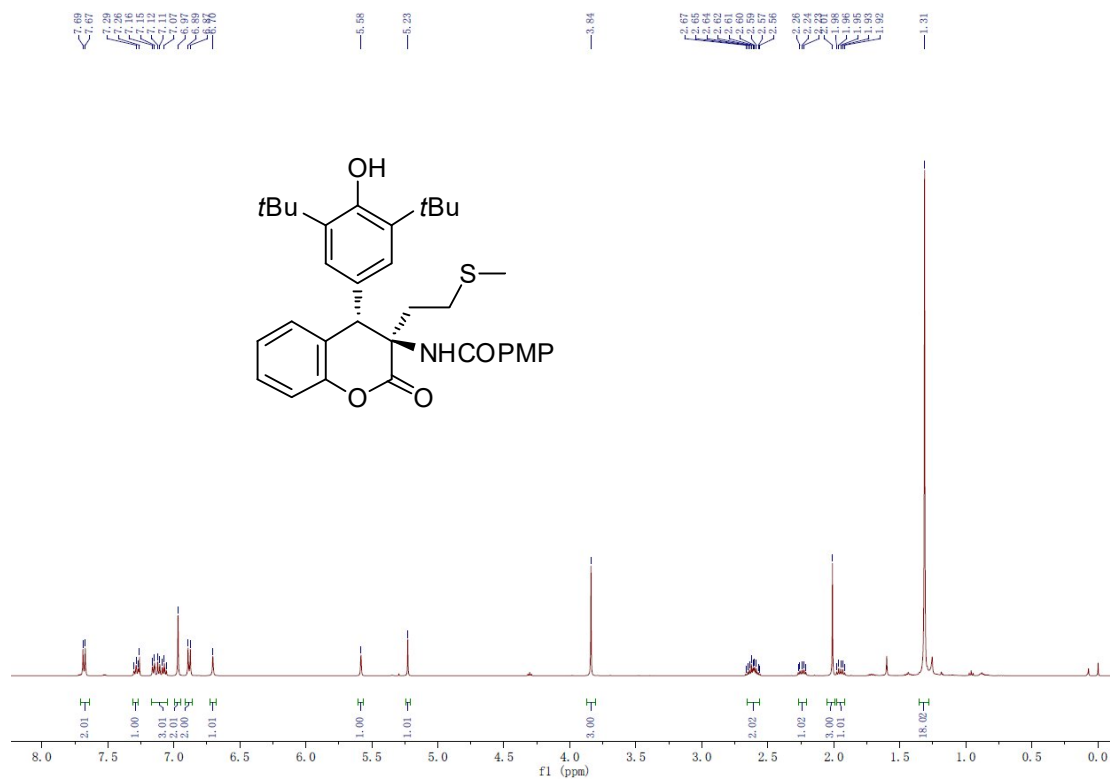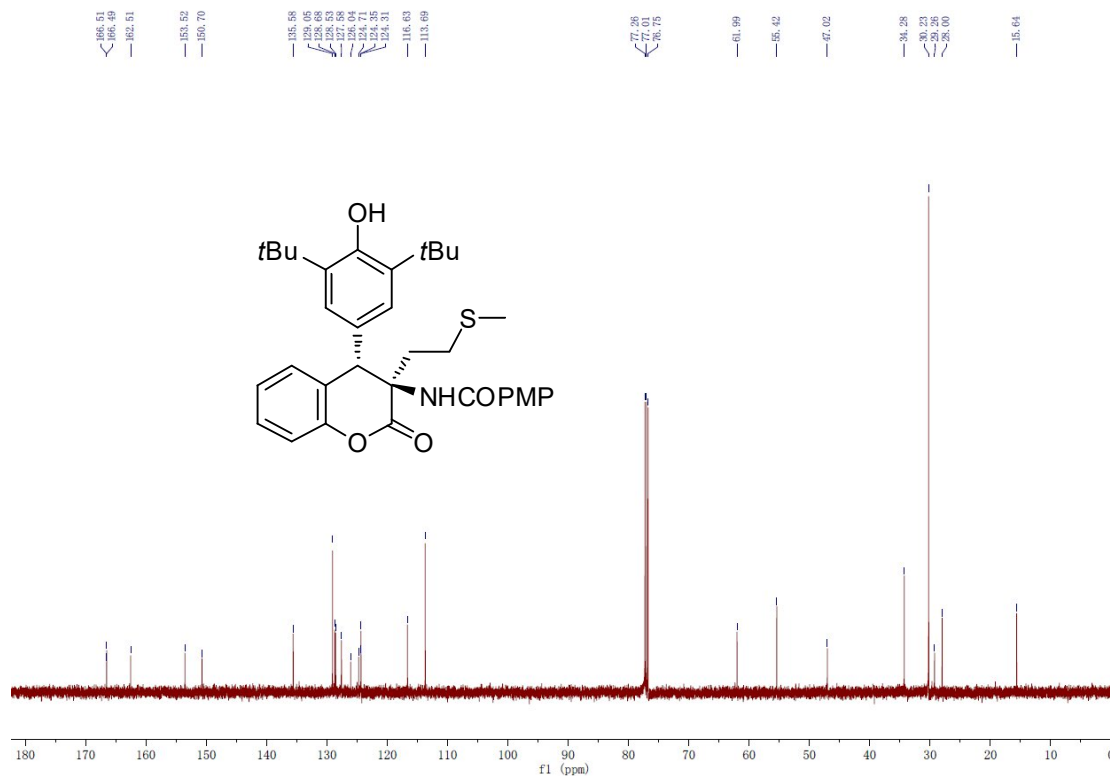

***N*-((3*R*,4*S*)-4-(3,5-di-*tert*-butyl-4-hydroxyphenyl)-3-ethyl-2-oxochroman-3-yl)-4-fluorobenzamide (3ah)**

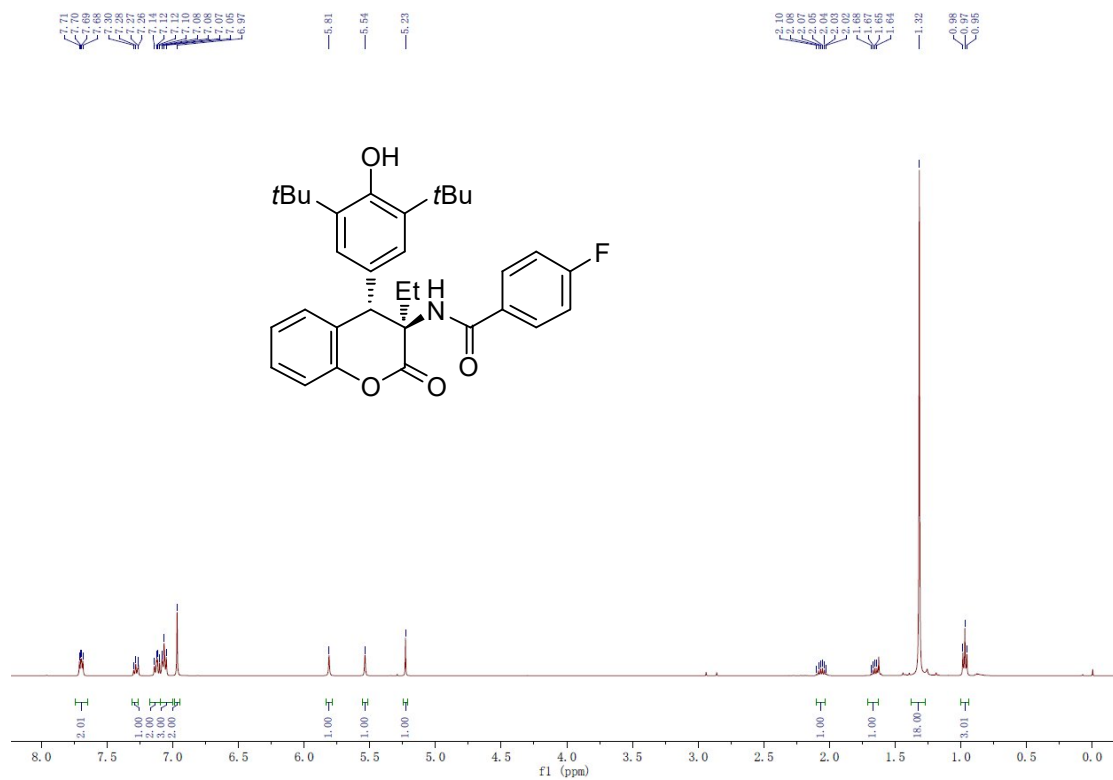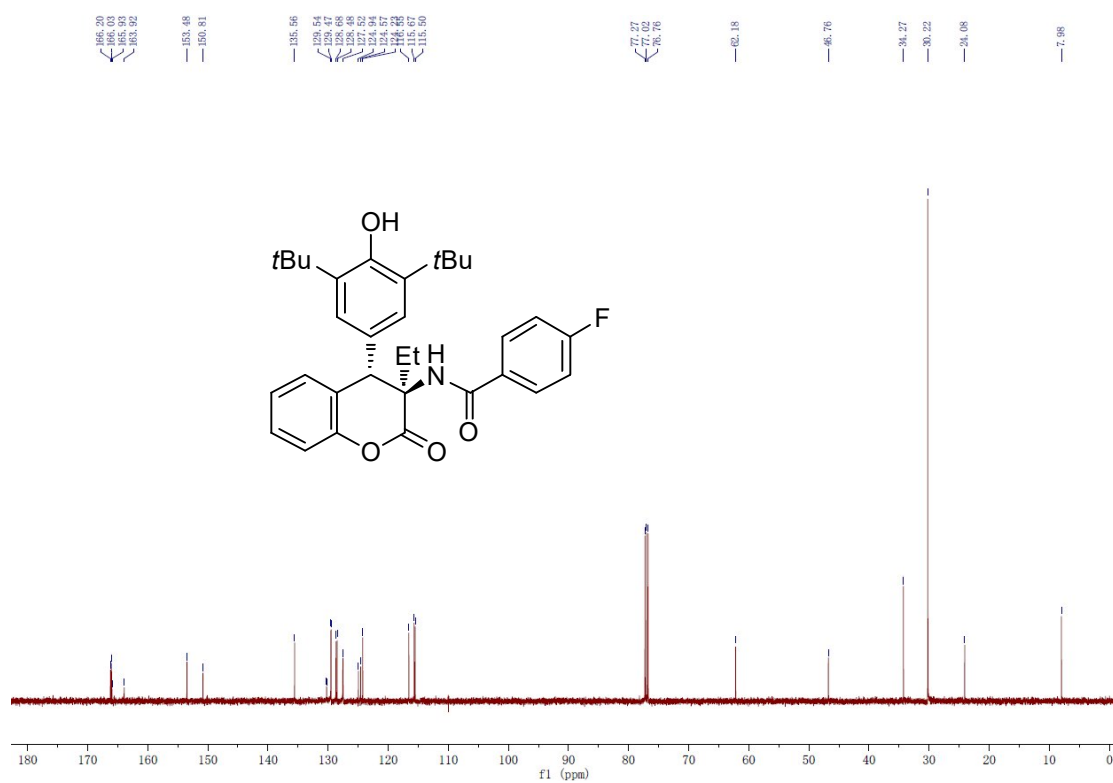

**4-Chloro-*N*-((3*R*,4*S*)-4-(3,5-di-*tert*-butyl-4-hydroxyphenyl)-3-ethyl-2-oxochroman-3-yl)benzamide (3ai)**

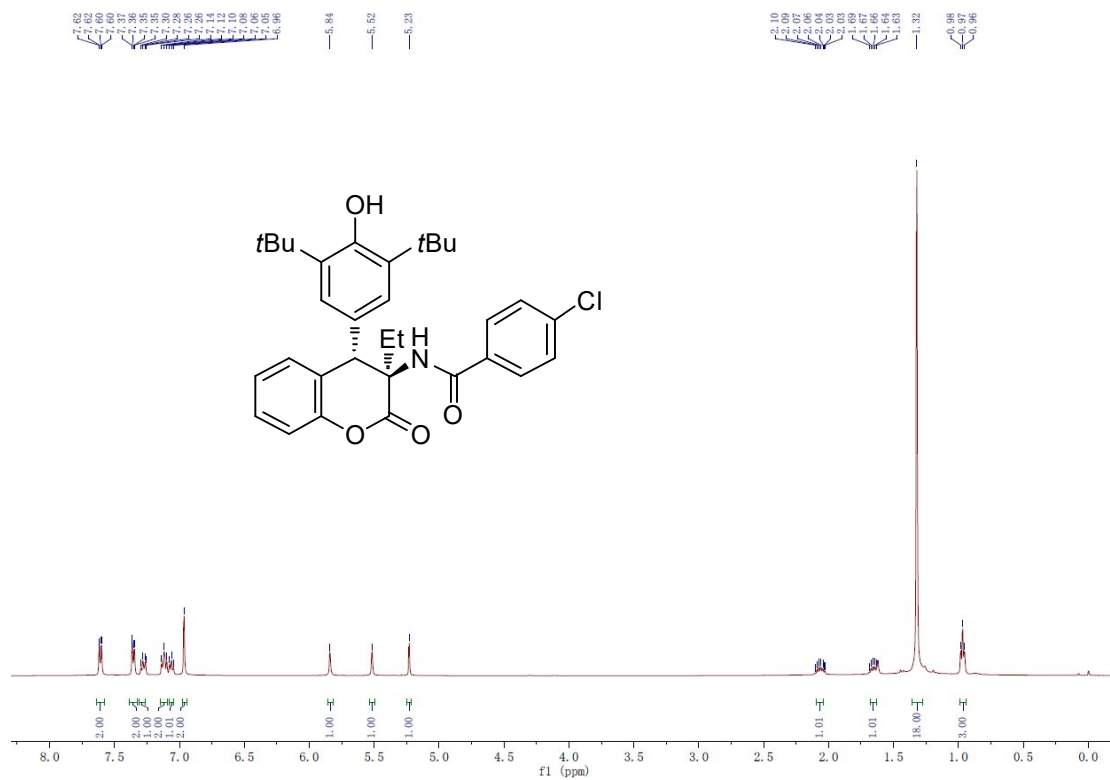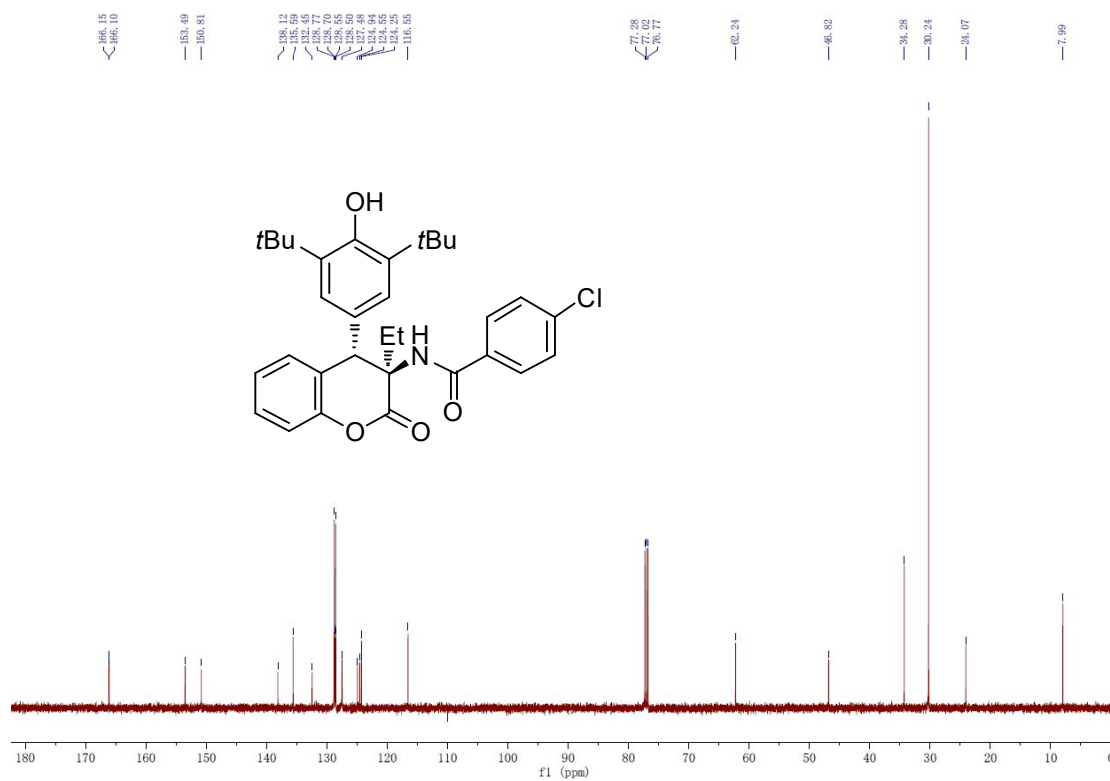

***N*-((3*R*,4*S*)-4-(3,5-di-*tert*-butyl-4-hydroxyphenyl)-3-ethyl-2-oxochroman-3-yl)-4-methylbenzamide (3aj)**

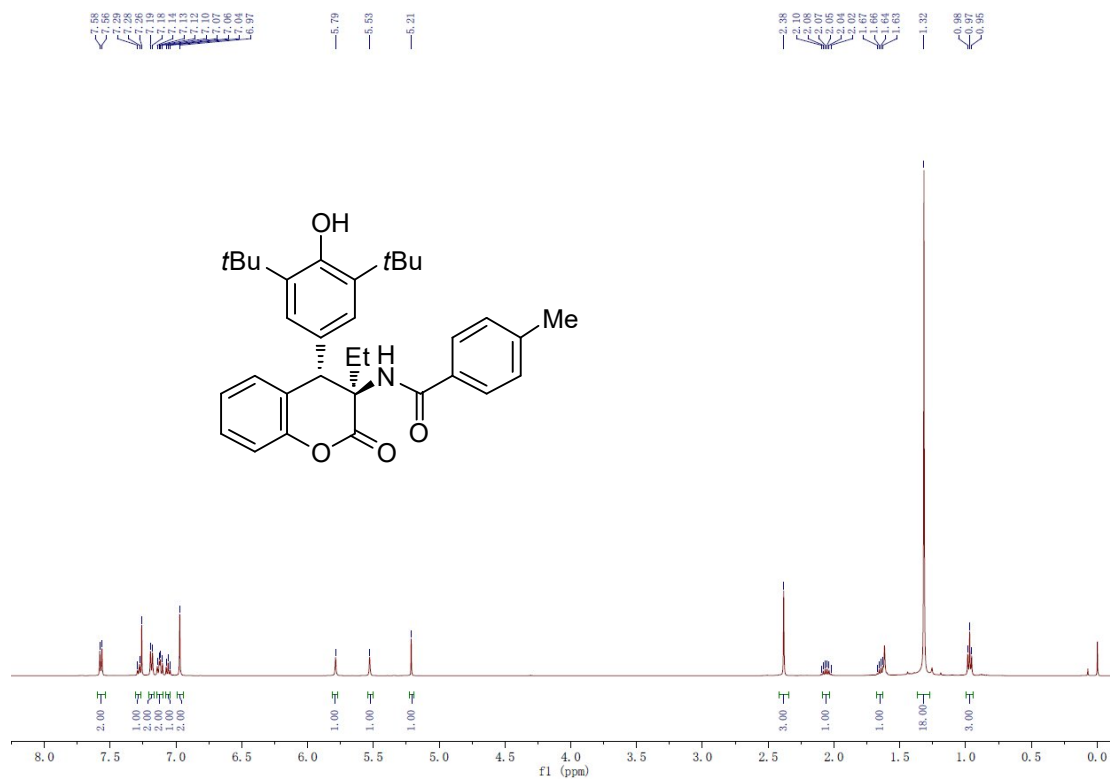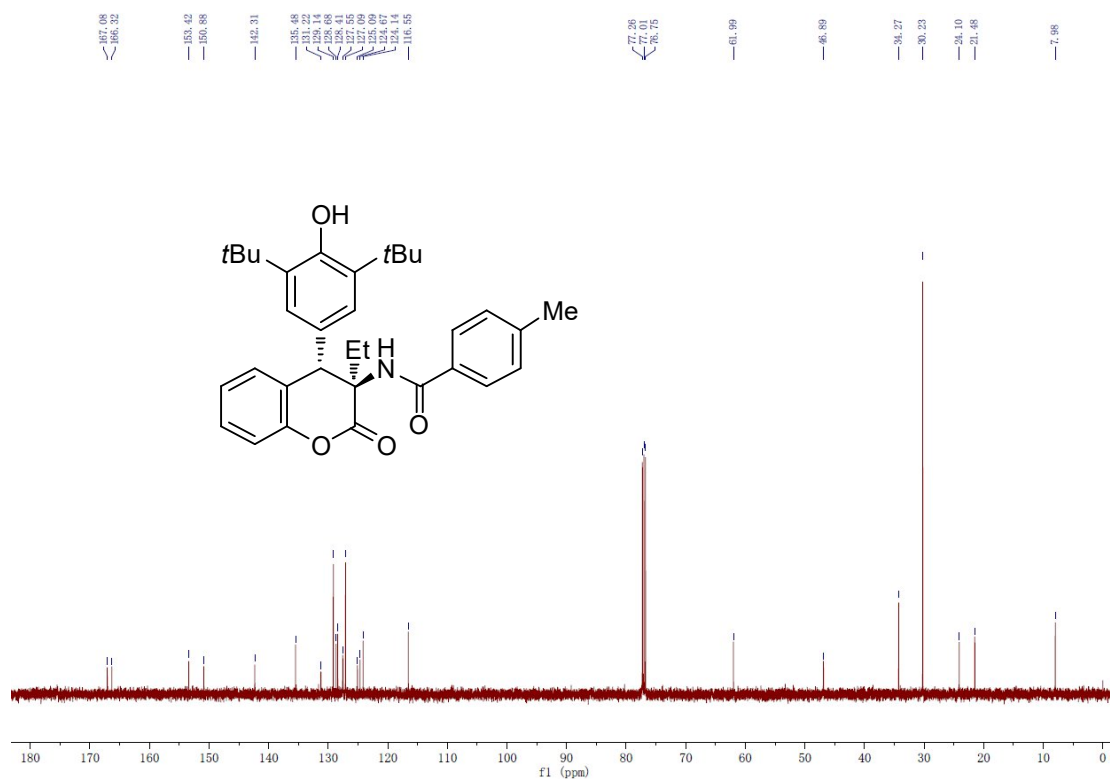

**3-Chloro-N-((3R,4S)-4-(3,5-di-*tert*-butyl-4-hydroxyphenyl)-3-ethyl-2-oxochroman-3-yl)benzamide (3ak)**

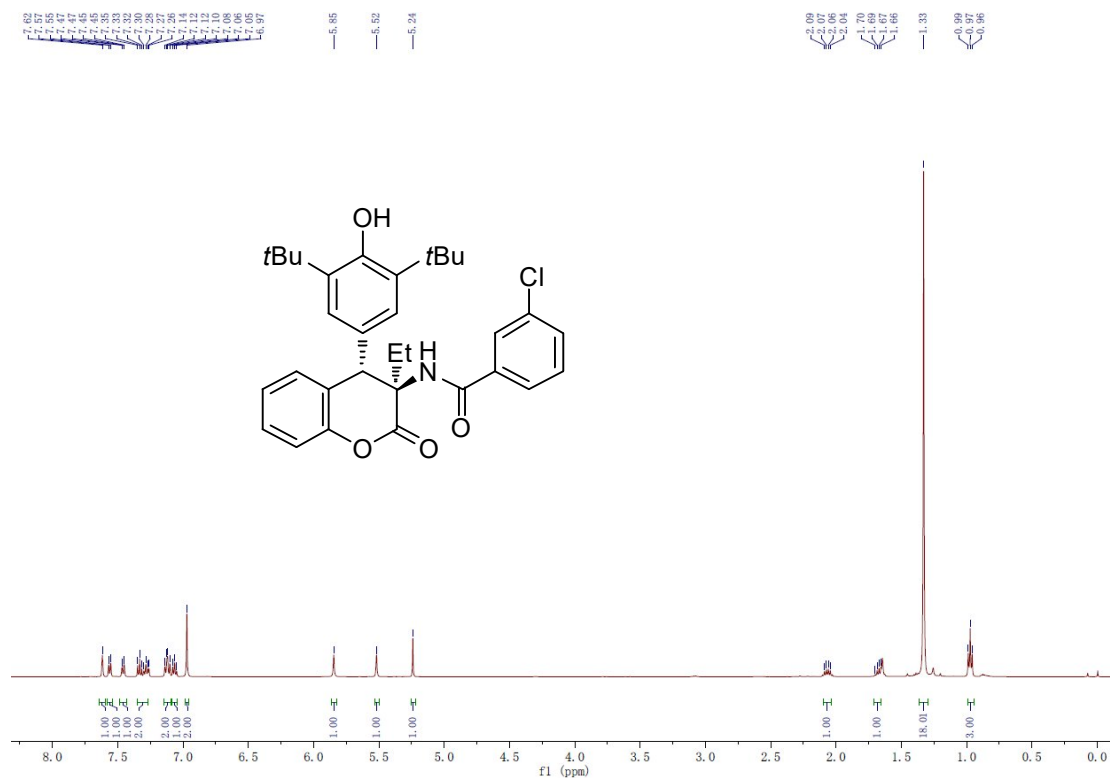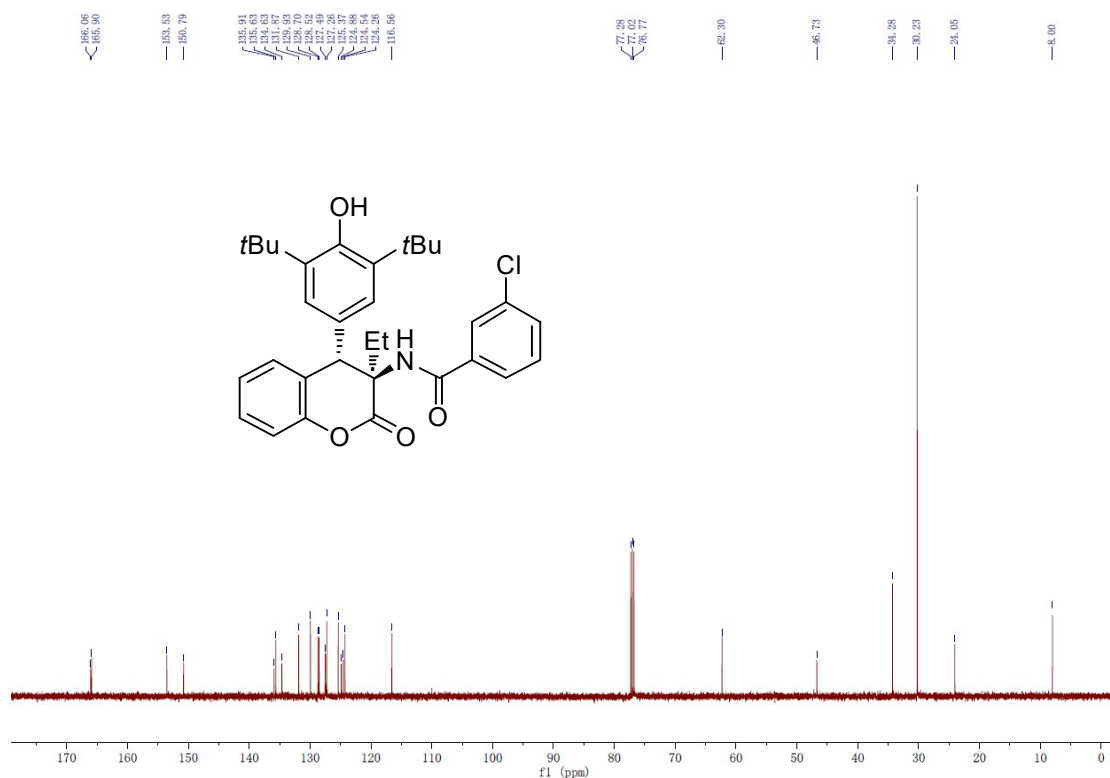

**3-Bromo-*N*-((3*R*,4*S*)-4-(3,5-di-*tert*-butyl-4-hydroxyphenyl)-3-ethyl-2-oxochroman-3-yl)benzamide (3al)**

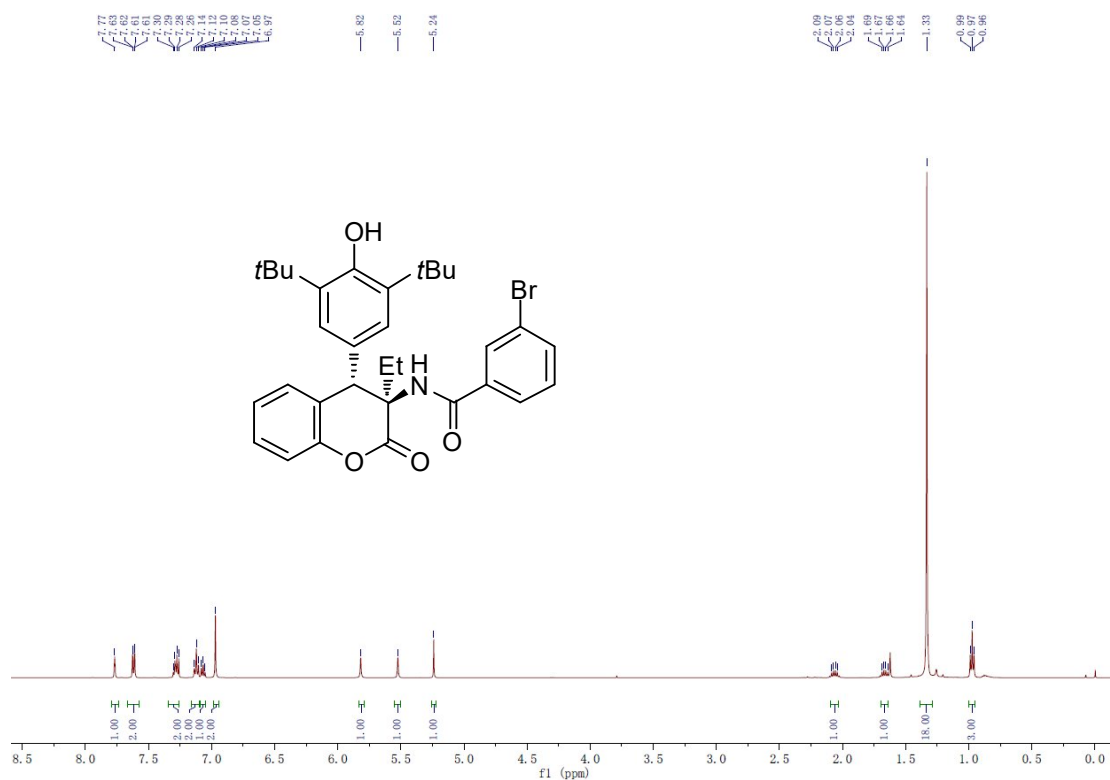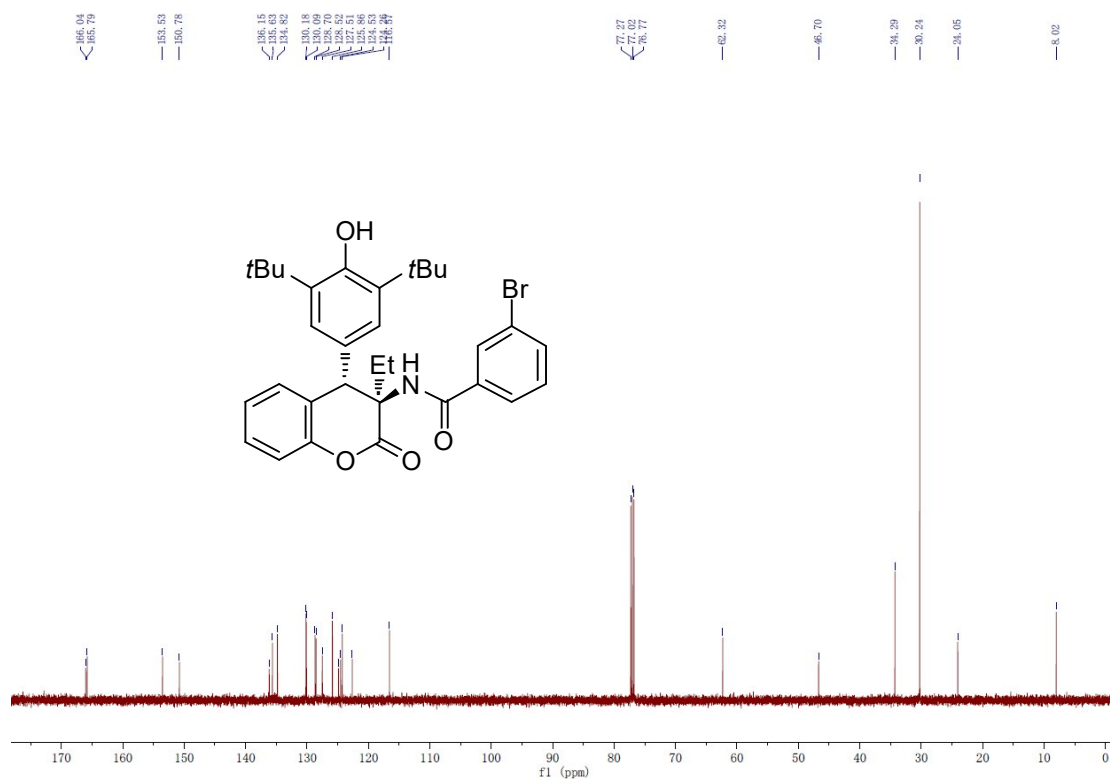



***N*-((3*R*,4*S*)-4-(3,5-di-*tert*-butyl-4-hydroxyphenyl)-3-ethyl-2-oxochroman-3-yl)-3-methylbenzamide (3am)**

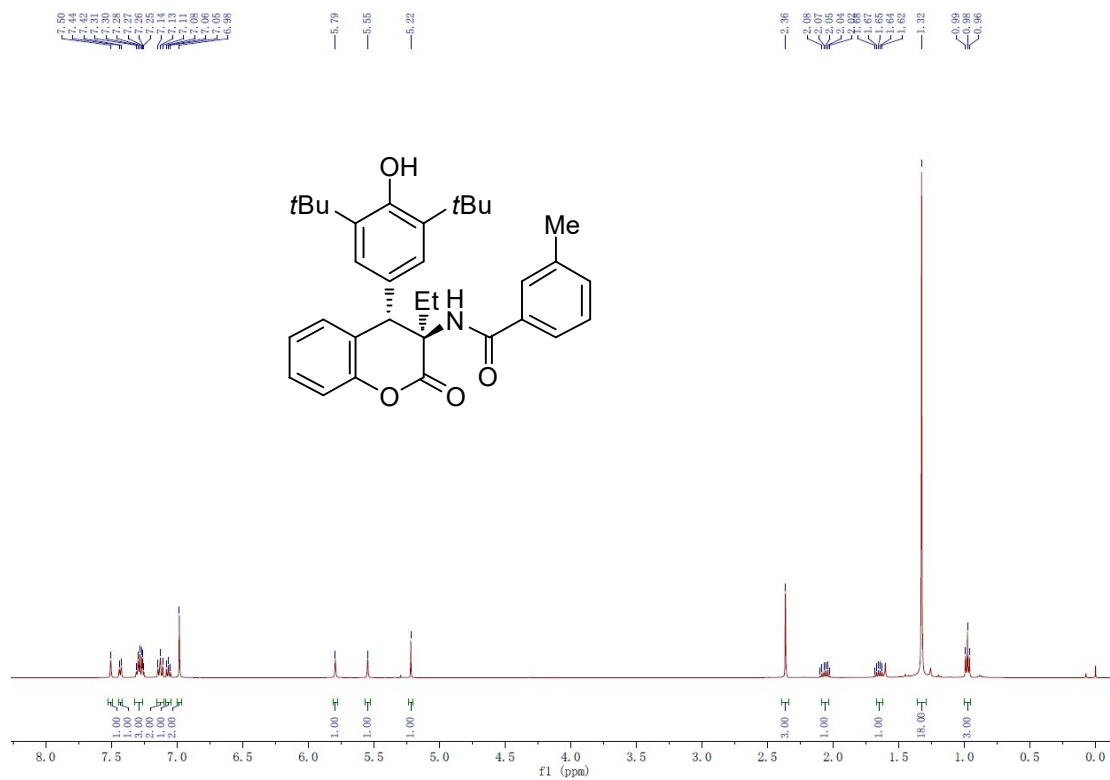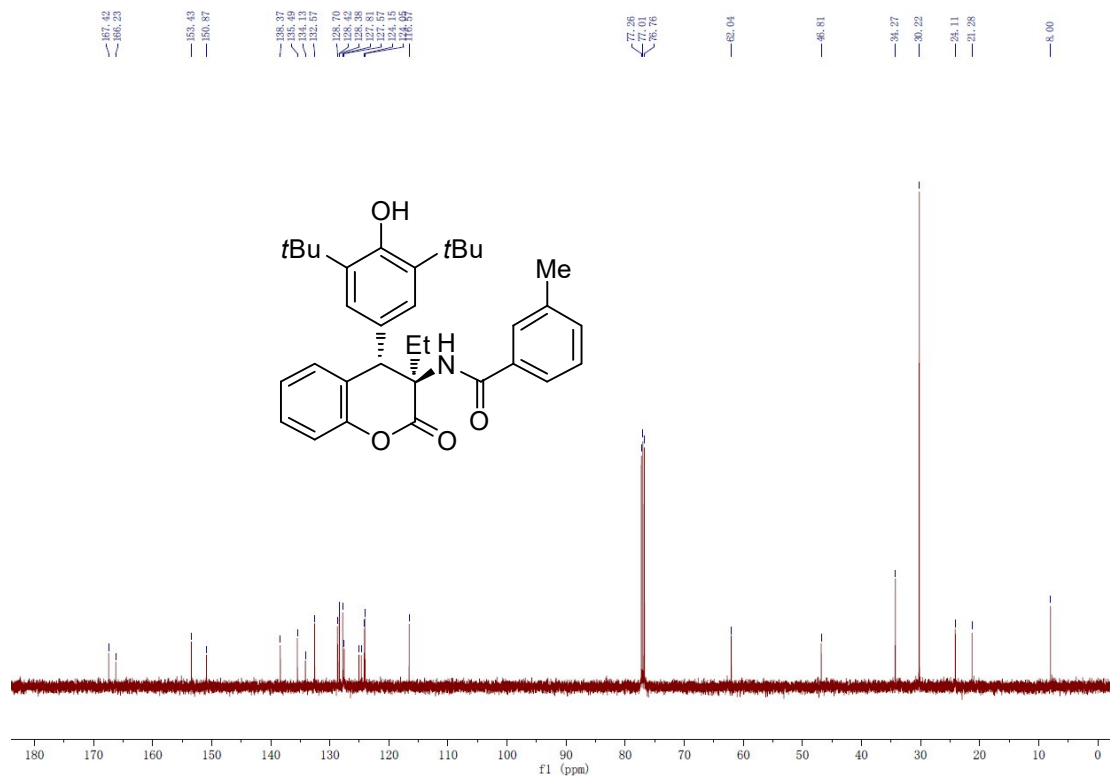

**2-Bromo-N-((3R,4S)-4-(3,5-di-*tert*-butyl-4-hydroxyphenyl)-3-ethyl-2-oxochroman-3-yl)benzamide (3an)**

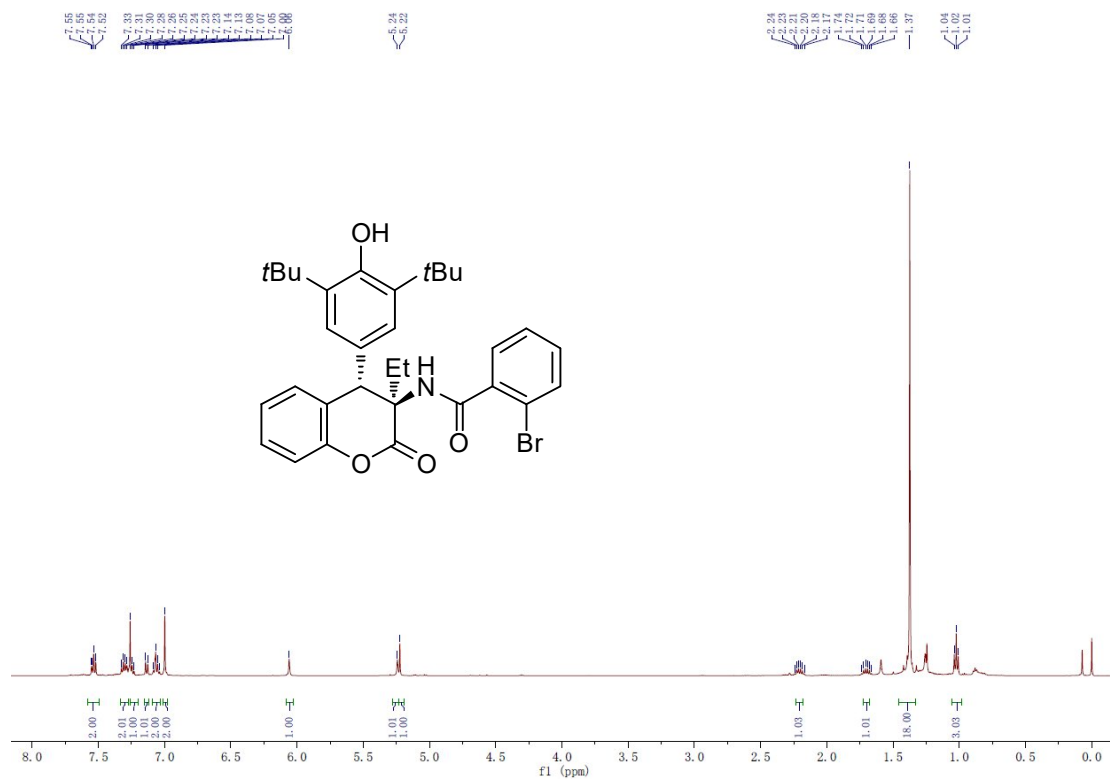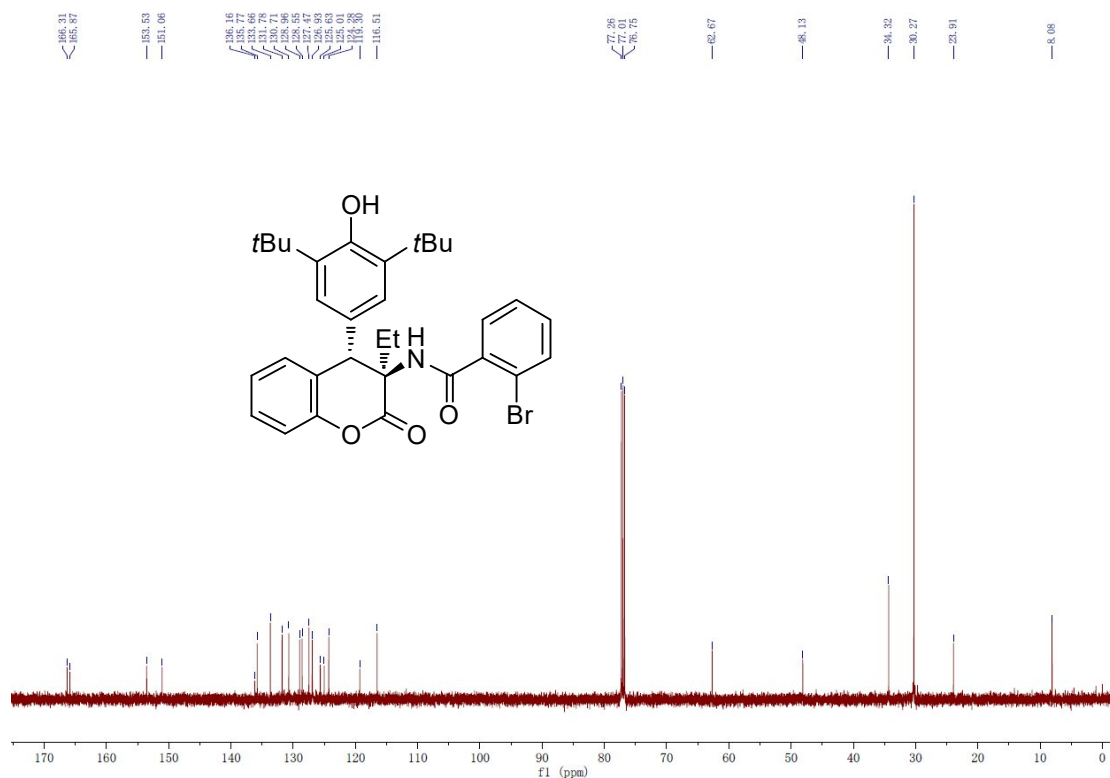

***N*-((3*R*,4*S*)-4-(3,5-di-*tert*-butyl-4-hydroxyphenyl)-3-ethyl-2-oxochroman-3-yl)-2-naphthamide (3ao)**

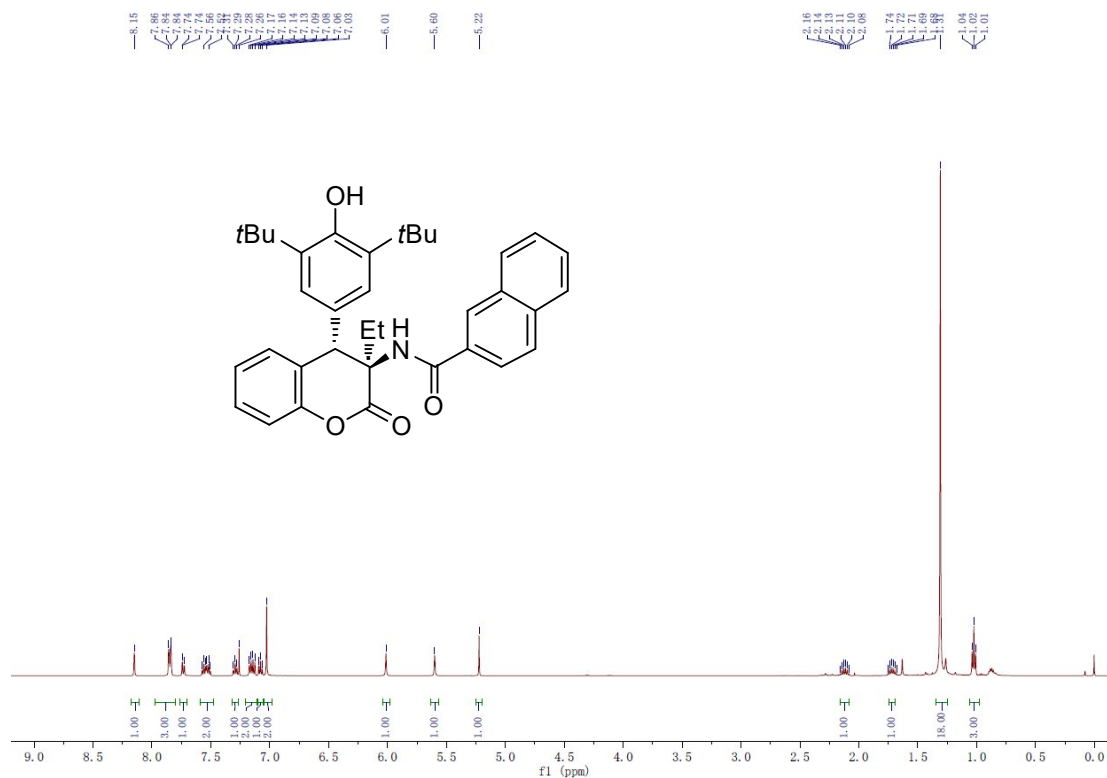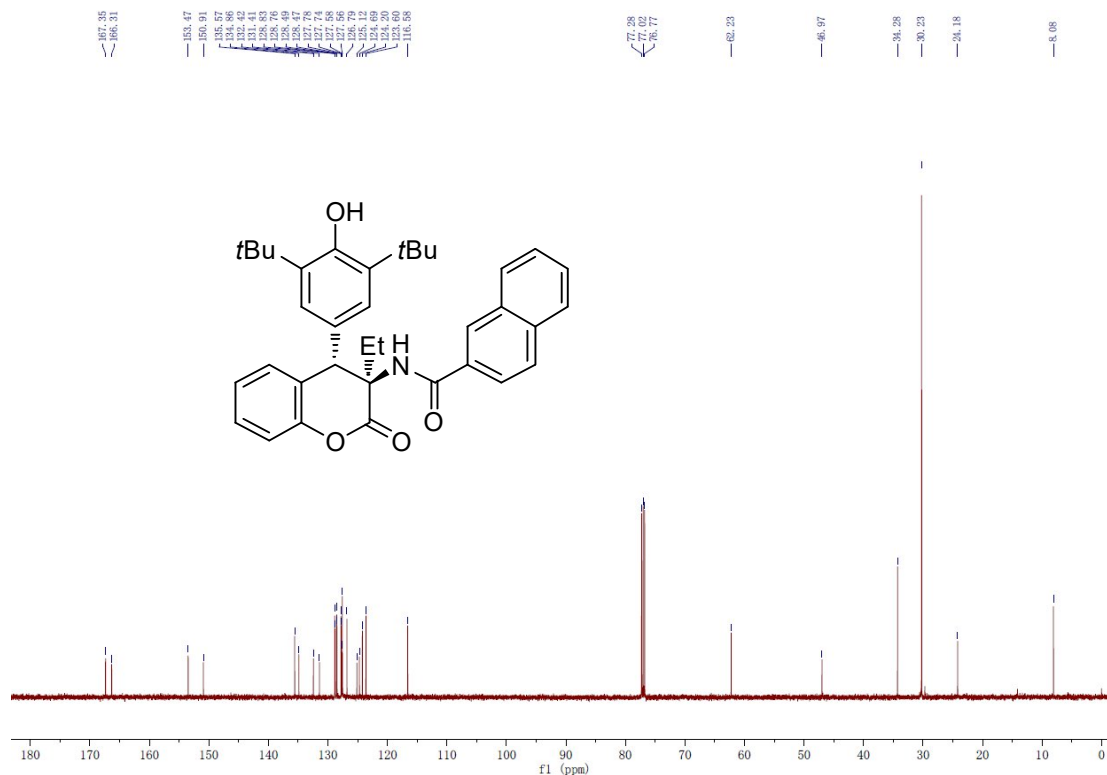

**N-((3R,4S)-4-(3,5-di-*tert*-butyl-4-hydroxyphenyl)-3-ethyl-2-oxochroman-3-yl)furan-2-carboxamide (3ap)**

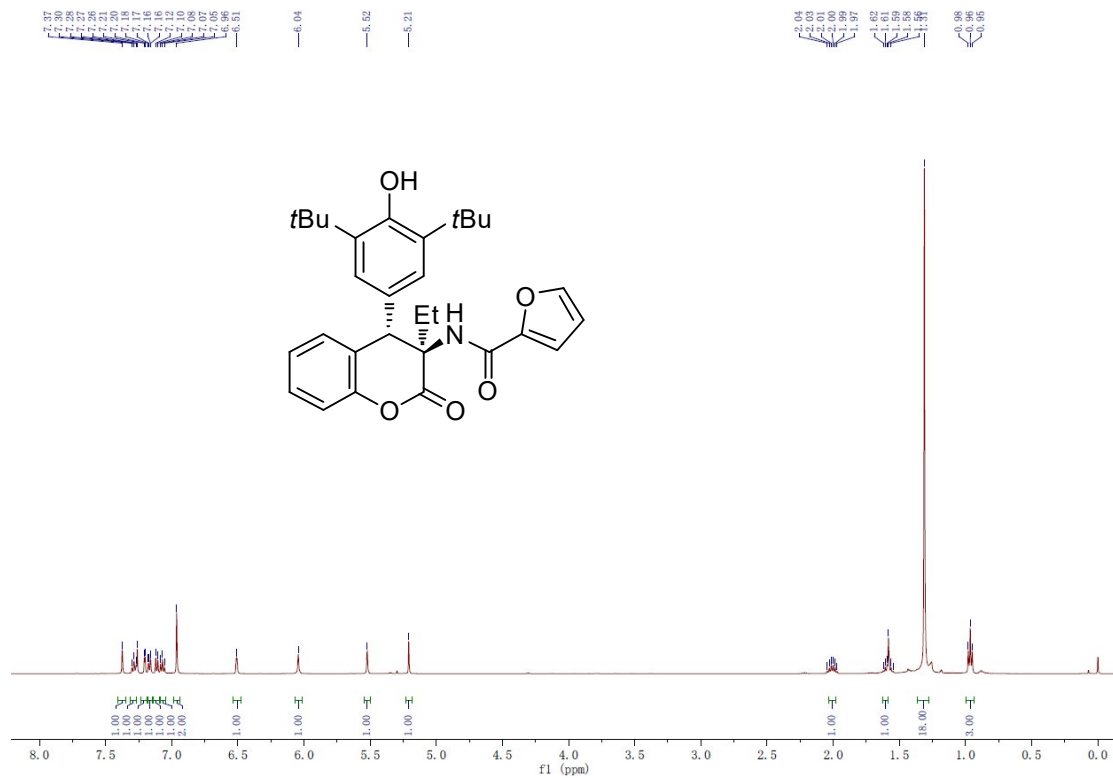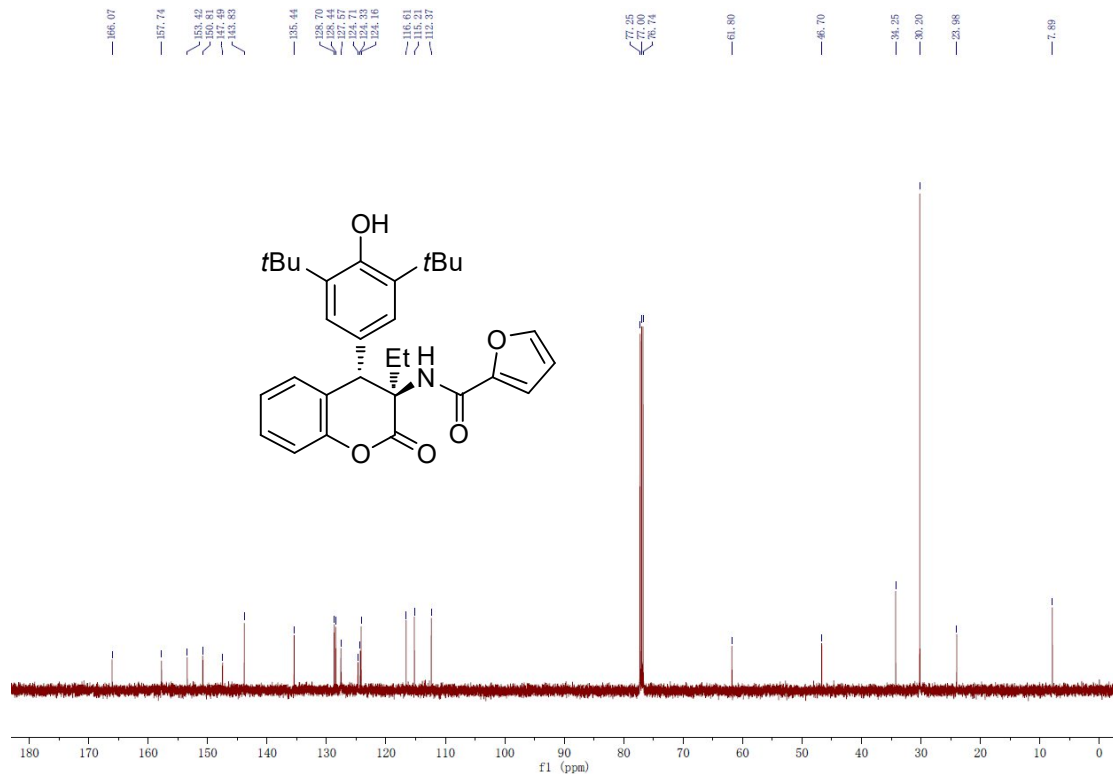

***N*-((3*R*,4*S*)-4-(3,5-di-*tert*-butyl-4-hydroxyphenyl)-3-ethyl-2-oxochroman-3-yl)thiophene-2-carboxamide (3aq)**

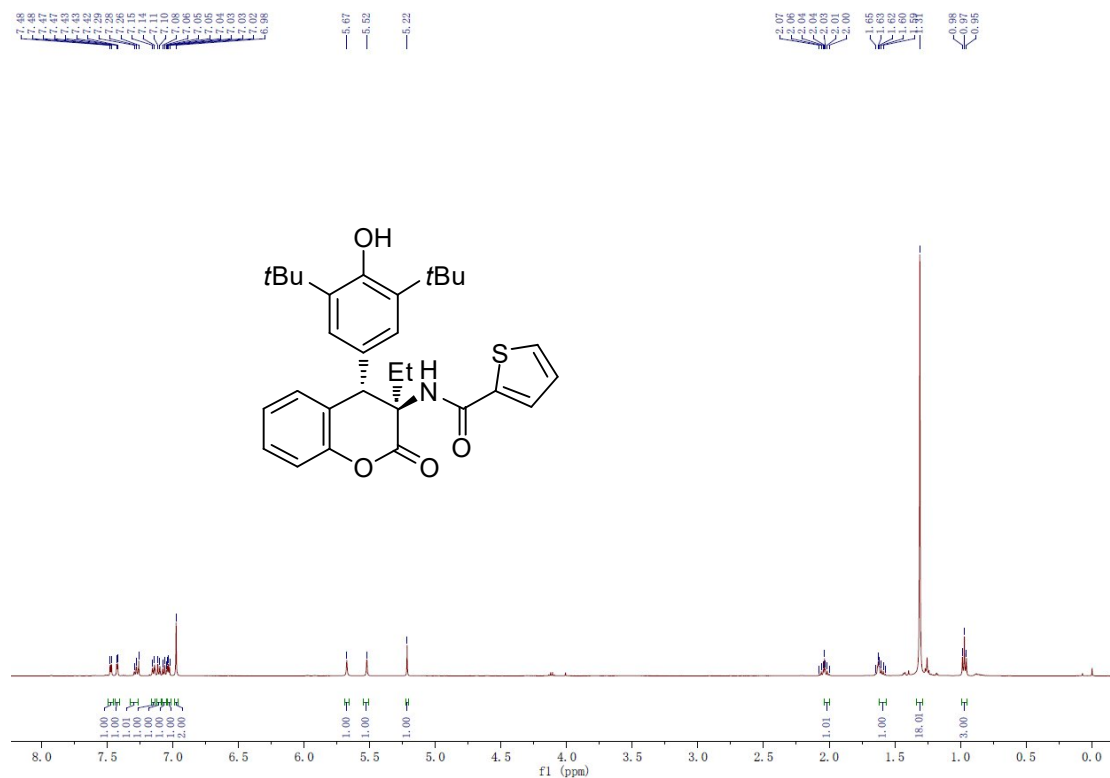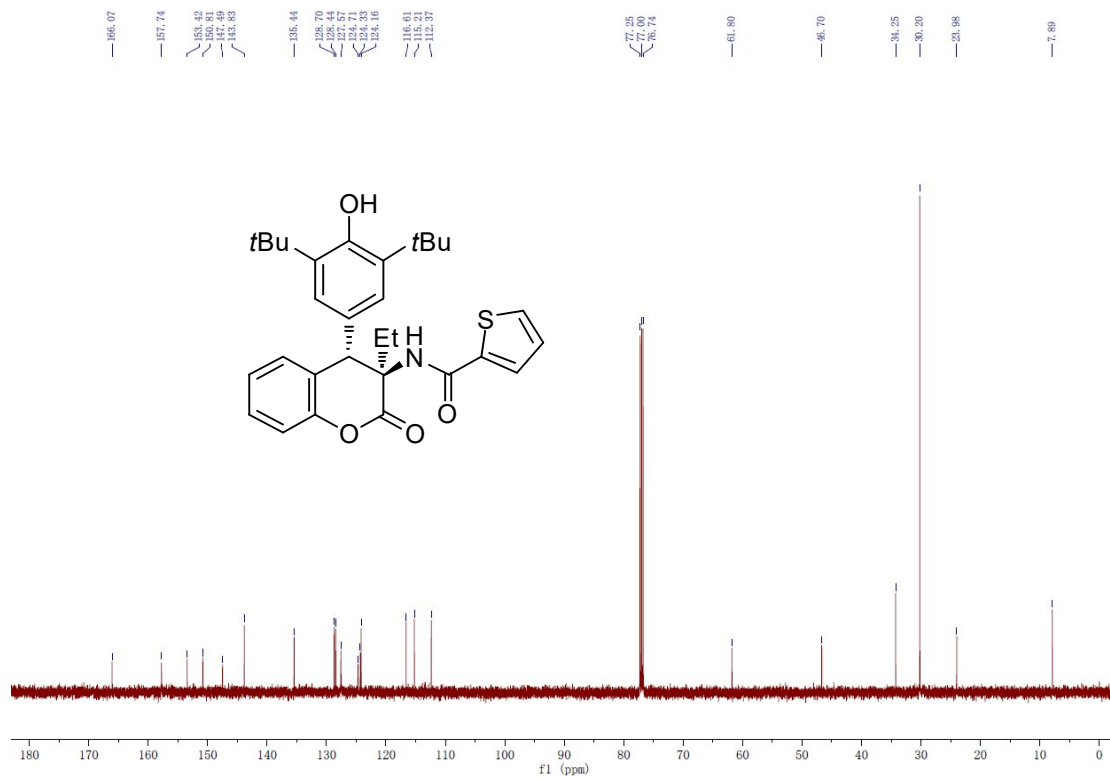

## H: Absolute Configuration and X-Ray Analysis Data

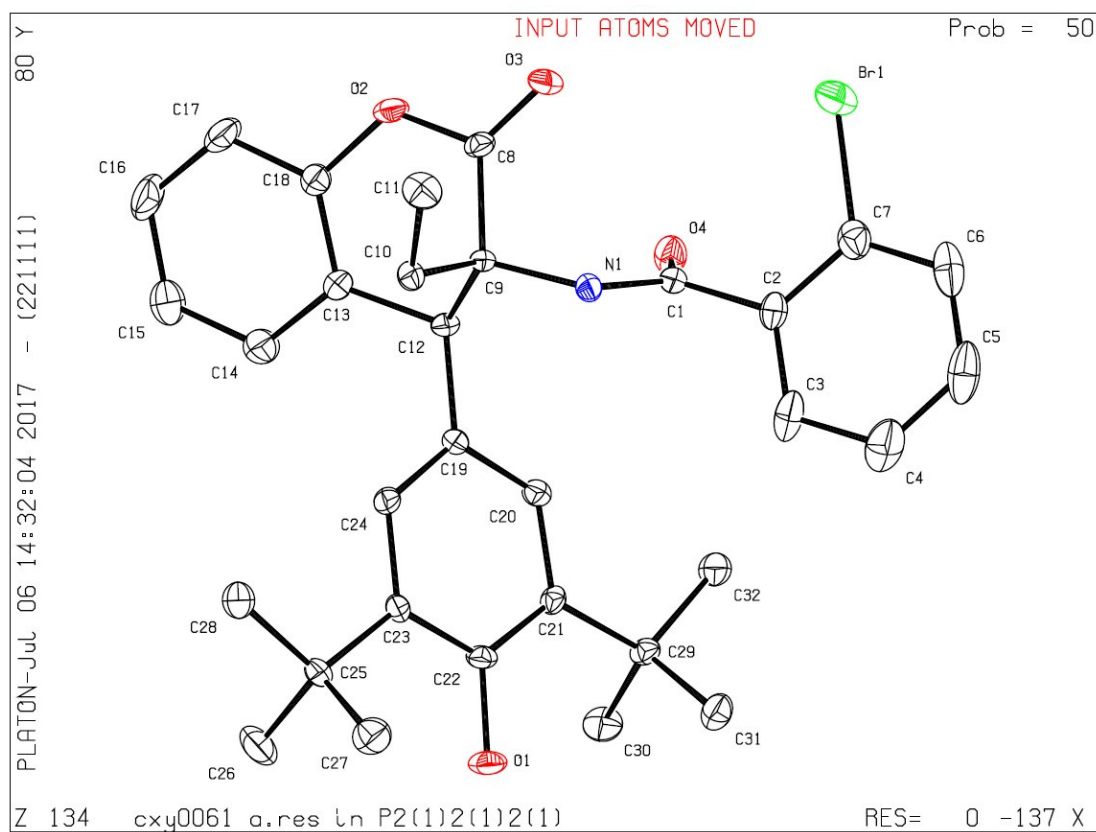

**Table Crystal data and structure refinement for 3an.**

|                                             |                                                               |
|---------------------------------------------|---------------------------------------------------------------|
| Identification code                         | <b>3an</b>                                                    |
| Empirical formula                           | C <sub>32</sub> H <sub>36</sub> BrNO <sub>4</sub>             |
| Formula weight                              | 578.53                                                        |
| Temperature/K                               | 150.0                                                         |
| Crystal system                              | orthorhombic                                                  |
| Space group                                 | P2 <sub>1</sub> 2 <sub>1</sub> 2 <sub>1</sub>                 |
| a/Å                                         | 10.3304(5)                                                    |
| b/Å                                         | 11.1679(5)                                                    |
| c/Å                                         | 24.5971(12)                                                   |
| α/°                                         | 90                                                            |
| β/°                                         | 90                                                            |
| γ/°                                         | 90                                                            |
| Volume/Å <sup>3</sup>                       | 2837.7(2)                                                     |
| Z                                           | 4                                                             |
| ρ <sub>calc</sub> /g/cm <sup>3</sup>        | 1.354                                                         |
| μ/mm <sup>-1</sup>                          | 1.486                                                         |
| F(000)                                      | 1208.0                                                        |
| Crystal size/mm <sup>3</sup>                | 0.42 × 0.38 × 0.31                                            |
| Radiation                                   | MoKα (λ = 0.71073)                                            |
| 2θ range for data collection/°              | 4.926 to 52.864                                               |
| Index ranges                                | -12 ≤ h ≤ 12, -13 ≤ k ≤ 13, -30 ≤ l ≤ 30                      |
| Reflections collected                       | 57777                                                         |
| Independent reflections                     | 5823 [R <sub>int</sub> = 0.0487, R <sub>sigma</sub> = 0.0234] |
| Data/restraints/parameters                  | 5823/8/351                                                    |
| Goodness-of-fit on F <sup>2</sup>           | 1.038                                                         |
| Final R indexes [I >= 2σ (I)]               | R <sub>1</sub> = 0.0337, wR <sub>2</sub> = 0.0815             |
| Final R indexes [all data]                  | R <sub>1</sub> = 0.0396, wR <sub>2</sub> = 0.0848             |
| Largest diff. peak/hole / e Å <sup>-3</sup> | 0.78/-0.73                                                    |
| Flack parameter                             | 0.127(2)                                                      |

## **I: Reference**

1. K. Zhao, Y. Zhi, T. Shu, A. Valkonen, K. Rissanen, D. Enders, *Angew. Chem. Int. Ed.* **2016**, *55*, 12104-12108.
2. T. Wang, Z. Yu, D. L. Hoon, C. Y. Phee, Y. Lan, Y. Lu, *J. Am. Chem. Soc.* **2016**, *138*, 265-271.
